# Supplementary material
Source: PubMed Central journal article supplement (PMC8525526)
Supplement: 7347_AppendixB.pdf [file 7347_AppendixB.pdf]

*Saad F, et al Results from a Canadian consensus forum of key controversial areas in the management of advanced prostate cancer: Recommendations for Canadian healthcare providers*

**APPENDIX B**

Question 0A: Please indicate your area of specialty

| Opt | Votes |
|-----|-------|
| ■   | 12    |
| ■   | 5     |
| ■   | 12    |

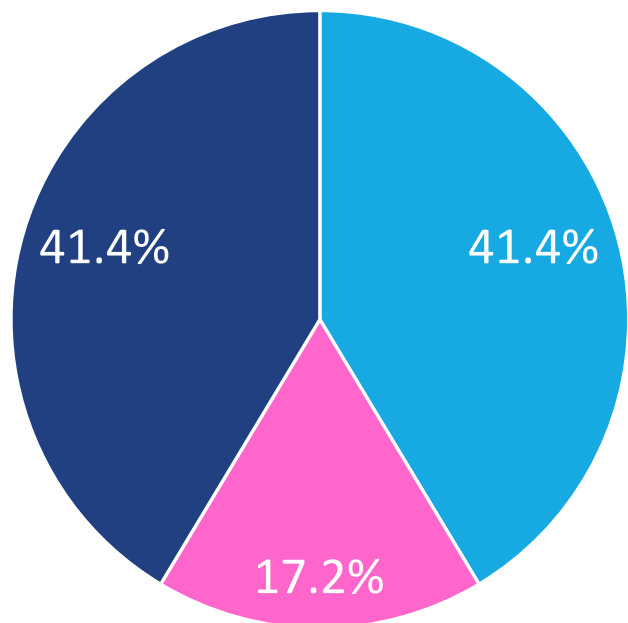

- Medical Oncologist
- Radiation Oncologist
- Urologist / Uro-Oncologist

Question 0B: Please indicate your region of practice

| Opt | Votes |
|-----|-------|
| ■   | 15    |
| ■   | 6     |
| ■   | 8     |

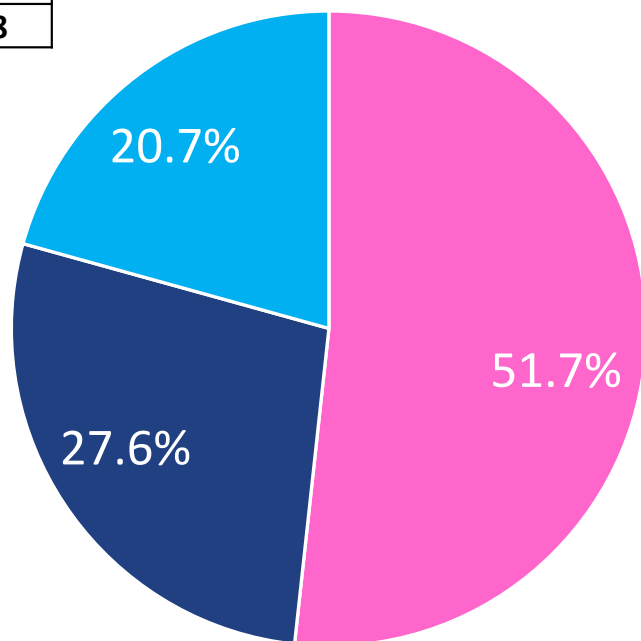

■ Ontario

■ Western Canada (BC, AB)

■ Quebec and Atlantic Canada

Question 0C: Please indicate the number of years you have been in practice

| Opt | Votes |
|-----|-------|
| ■   | 16    |
| ■   | 12    |

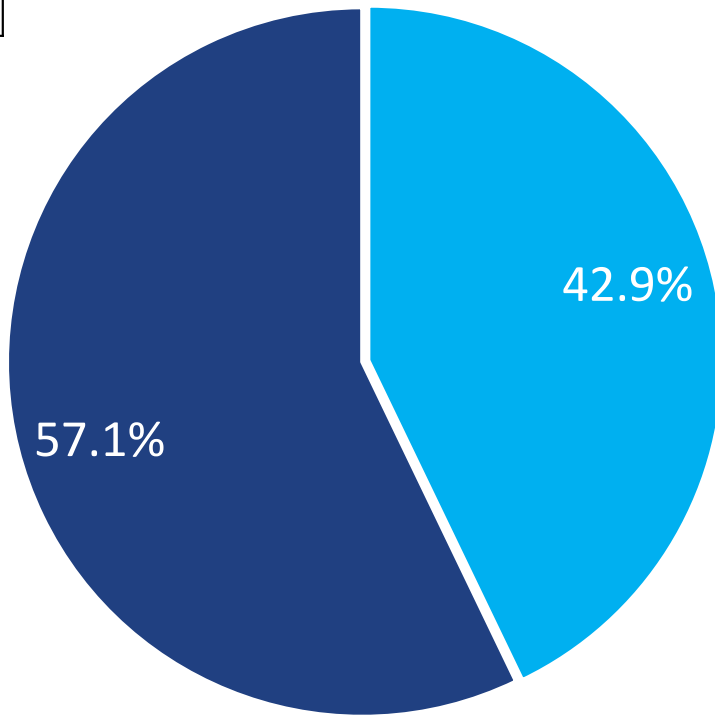

■ Less than 10 years

■ 10 years or greater

Question 1: At what confirmed PSA level do you recommend imaging for asymptomatic patients with rising PSA after radical (definitive) radiation therapy?

| Opt | Votes |
|-----|-------|
| 1   | 1     |
| 18  | 18    |
| 6   | 6     |
| 4   | 4     |

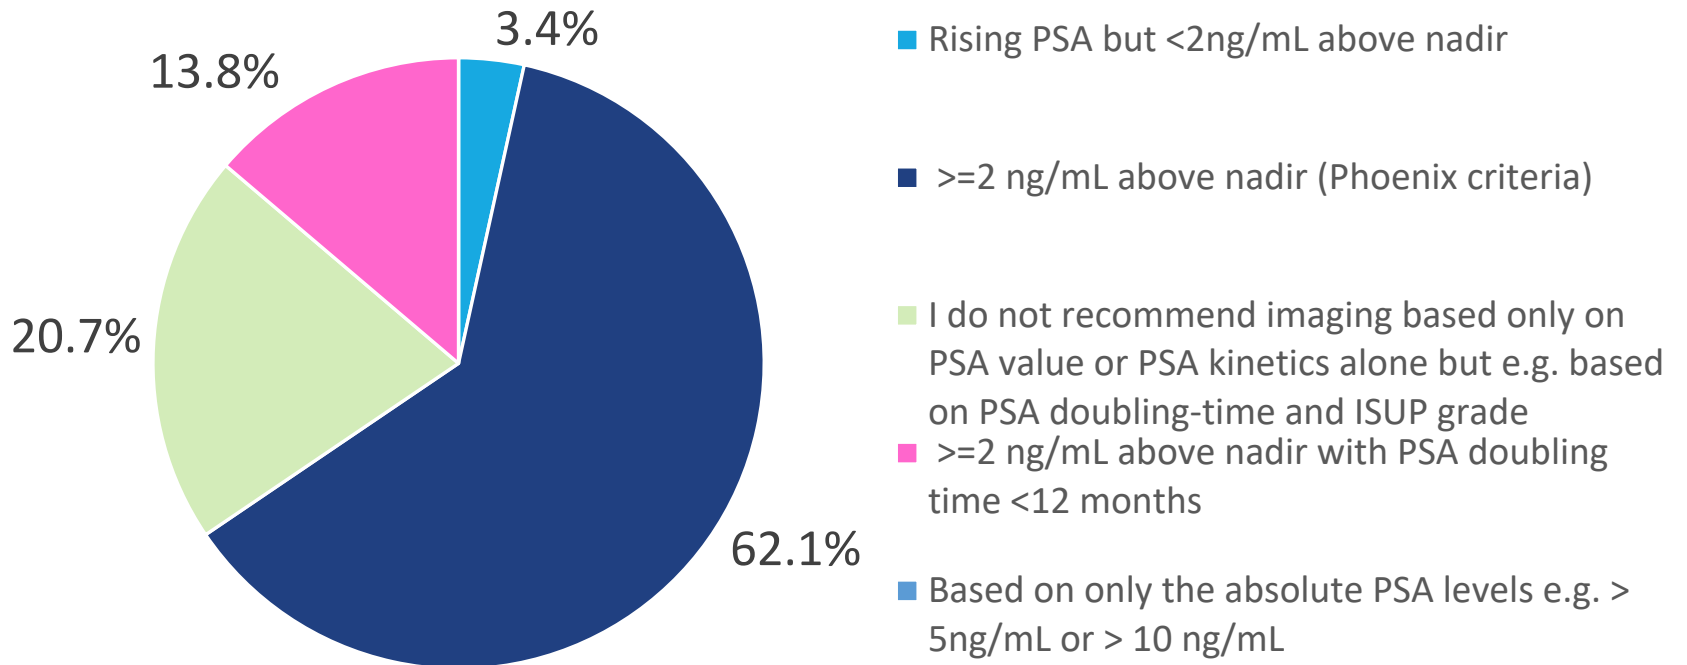

Question 2: Which imaging modality(ies) do you most often use for patients with rising PSA after radical prostatectomy?

| Opt | Votes |
|-----|-------|
| ■   | 23    |
| ■   | 5     |

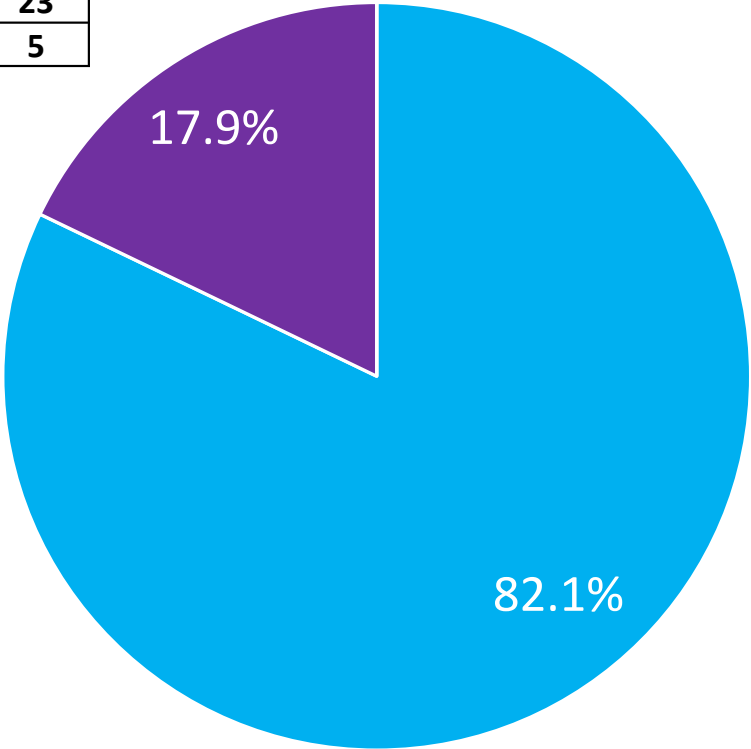

- CT and bone scintigraphy (plus/minus pelvic MRI)
- PSMA PET CT/MRI (plus/minus pelvic MRI)
- Whole-body MRI alone (plus/minus pelvic MRI)

Question 3: Do positive findings on PSMA PET after reaching biochemical recurrence change your management approach for a patient?

| Opt | Votes |
|-----|-------|
| ■   | 7     |
| ■   | 17    |

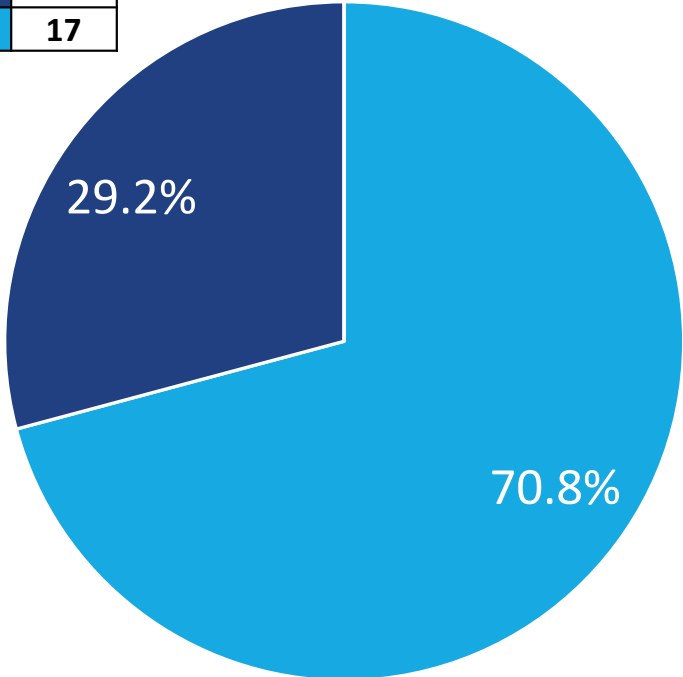

- It changes my treatment and monitoring plan
- It changes only my treatment plan
- It changes only my monitoring plan
- It rarely changes my treatment or management approach

Question 4: Do you recommend repeating imaging (negative pre-operative imaging) for an asymptomatic pN0 patient with PSA persistence ( $\geq 0.1$  ng/mL) four to six weeks after radical prostatectomy?

| Opt | Votes |
|-----|-------|
| ■   | 4     |
| ■   | 9     |
| ■   | 7     |

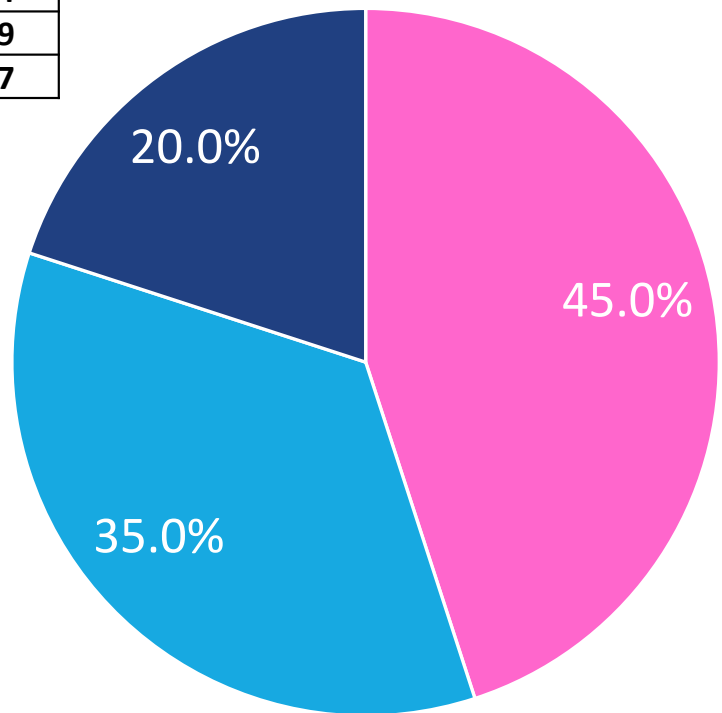

- No
- Yes, to establish a new baseline following radical prostatectomy
- Yes, but only in the presence of other adverse factors (e.g. Gleason score, intraductal etc.)

Question 5: Should mCSPC/CNPC patients still be stratified as high/low volume and high/low risk to inform treatment decision making or can we consider this as an all comer population?

| Opt        | Votes |
|------------|-------|
| Dark Blue  | 7     |
| Purple     | 7     |
| Light Blue | 26    |
| Pink       | 23    |

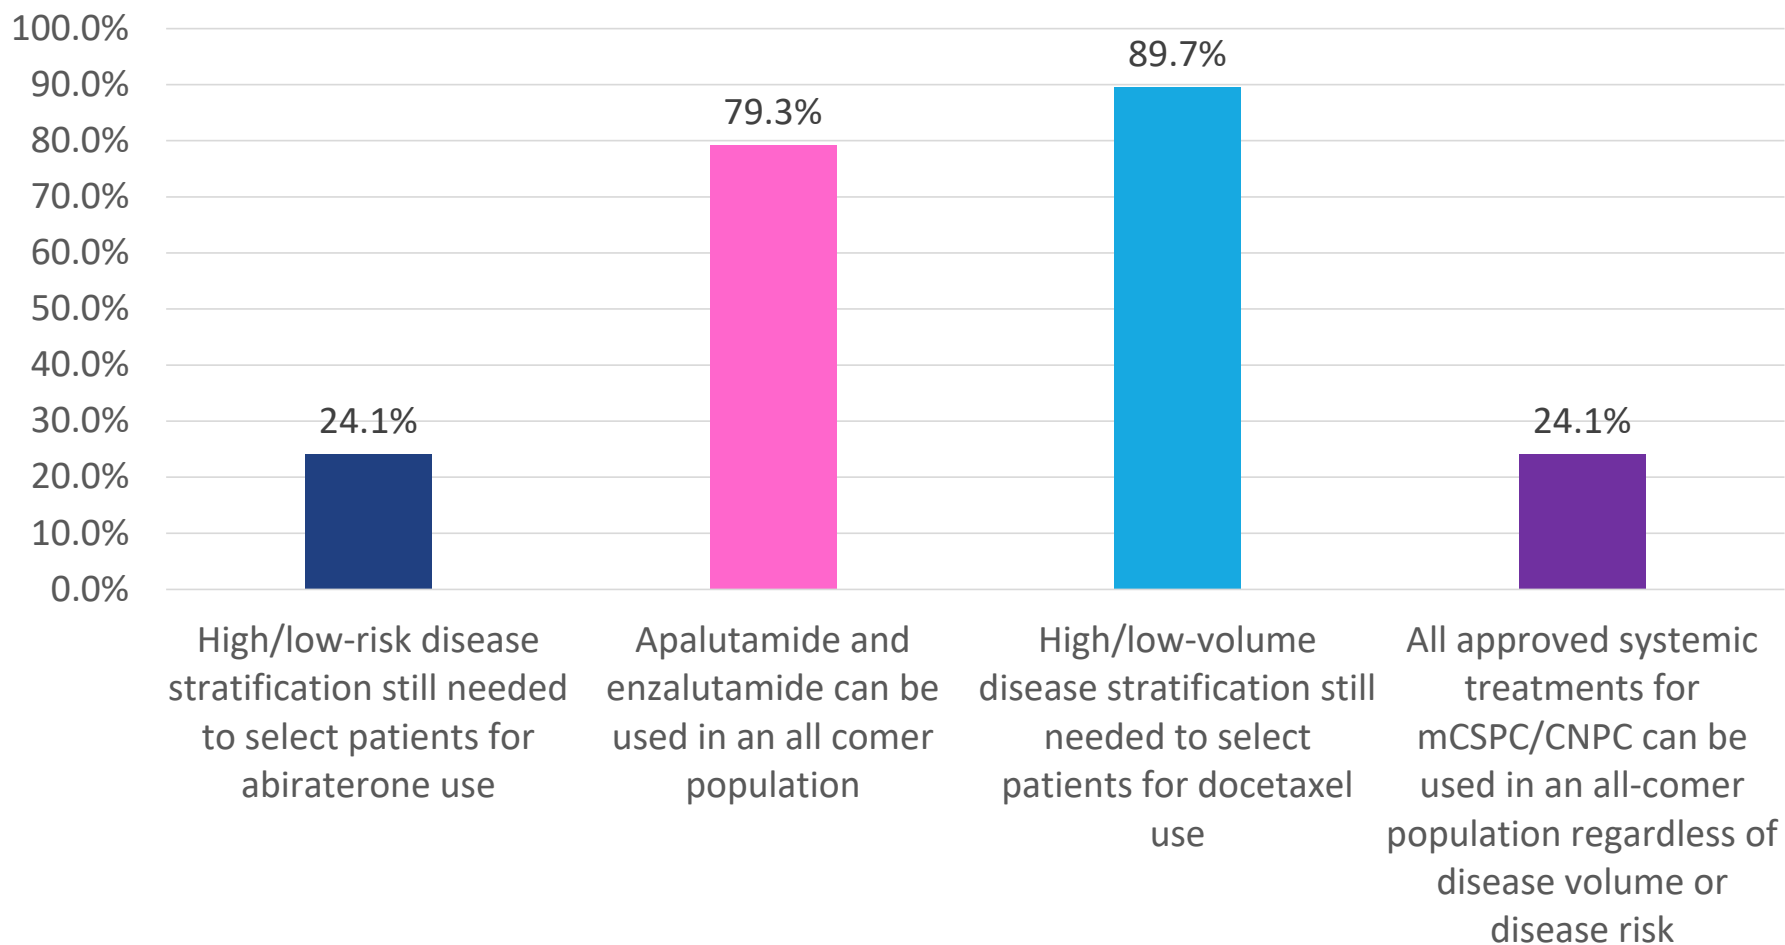



## Slide 8

---

### LYY[N1] Yang's calculation

Li, Yang Yun [JOICA NON-J&J], 2021-03-11

Question 6: Which definition do you currently use to guide treatment selection of abiraterone acetate plus prednisone in addition to ADT in patients with metastatic castration-sensitive/naïve prostate cancer (CSPC/CNPC)?

| Opt | Votes |
|-----|-------|
| ■   | 11    |
| ■   | 17    |
| ■   | 1     |

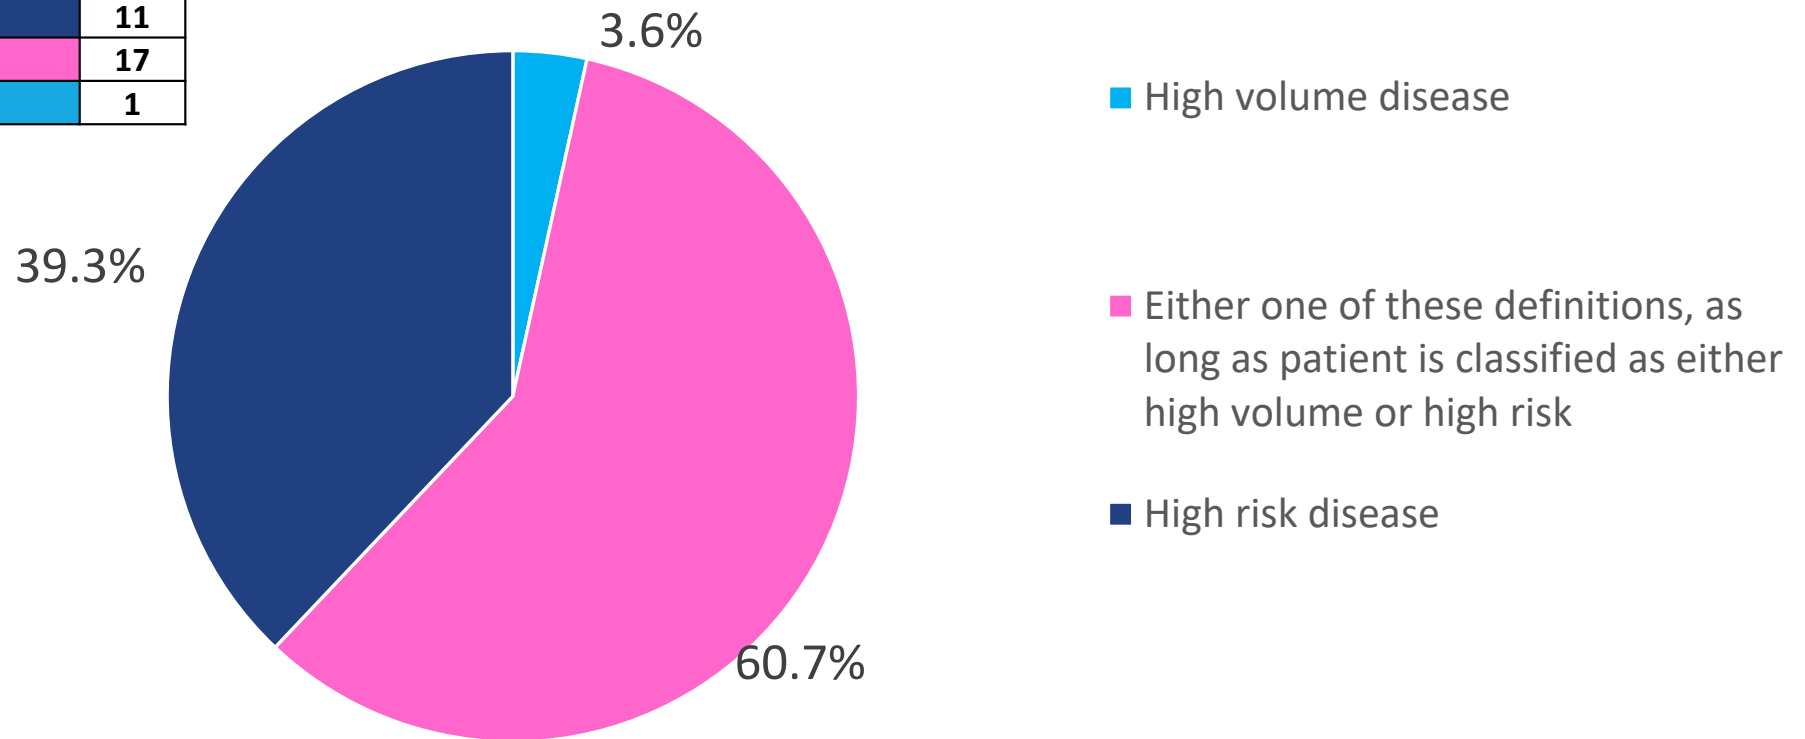

Question 7: Which patient population do you recommend for use of enzalutamide in addition to ADT in patients with metastatic castration-sensitive/naïve prostate cancer (CSPC/CNPC)?

| Opt | Votes |
|-----|-------|
|     | 29    |

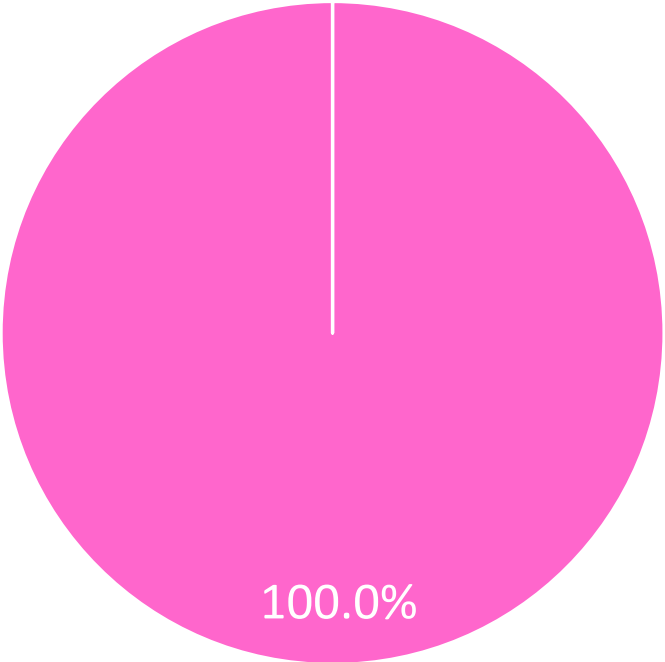

- High volume disease
- Low volume disease
- Use in all-comer population

Question 8: Which patient population do you recommend for use of apalutamide in addition to ADT in patients with castration-sensitive/naïve prostate cancer (CSPC/CNPC)?

| Opt | Votes |
|-----|-------|
|     | 29    |

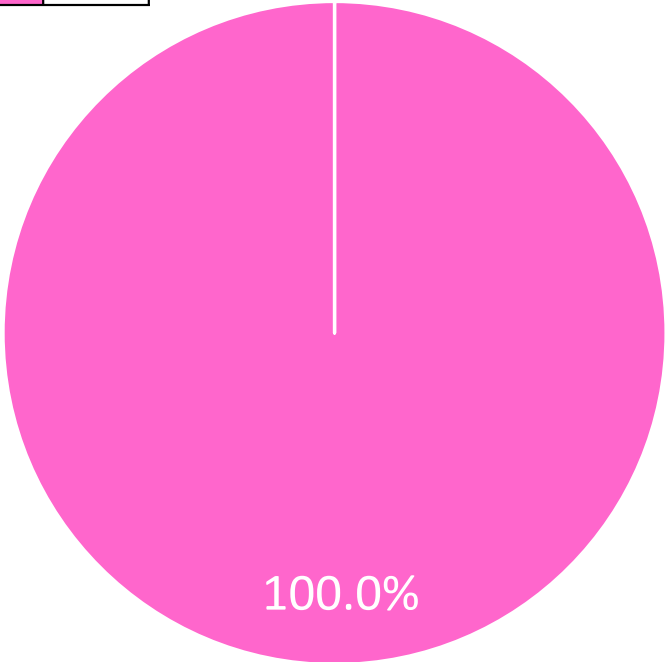

- High volume disease
- Low volume disease
- Use in all-comer population

Question 9: What is your preferred treatment in addition to ADT in patients with de-novo high-volume metastatic (M1) castration-sensitive/naïve prostate cancer (CSPC/CNPC) without symptoms from the primary tumour?

| Opt | Votes |
|-----|-------|
| ■   | 12    |
| ■   | 17    |

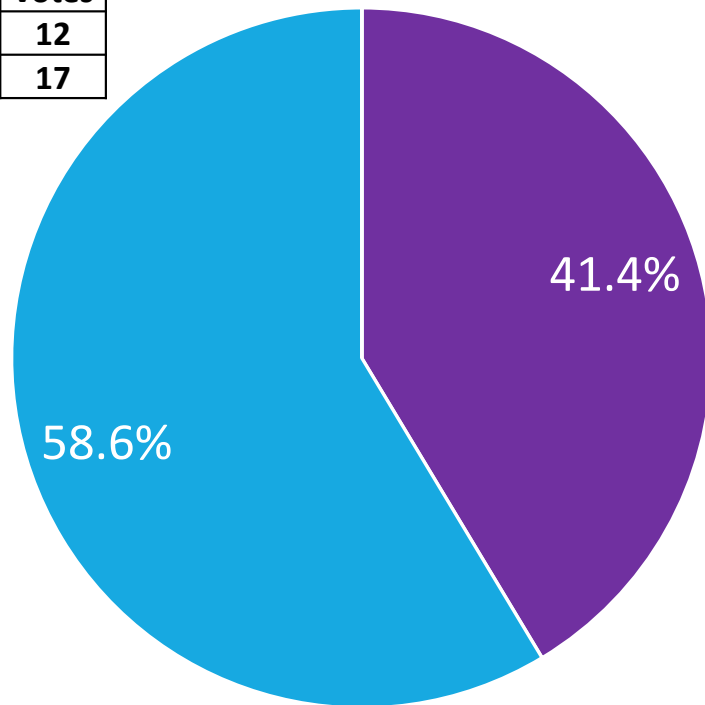

- Any one of docetaxel or abiraterone or apalutamide or enzalutamide
- AR pathway inhibitor (abiraterone or apalutamide or enzalutamide)
- Docetaxel
- Docetaxel plus AR pathway inhibitor (abiraterone or apalutamide or enzalutamide)
- NSAA
- No additional treatment

Question 9a: Is docetaxel still an option in patients with de-novo high-volume metastatic (M1) castration-sensitive/naïve prostate cancer (CSPC/CNPC) without symptoms from the primary tumour?

| Opt | Votes |
|-----|-------|
| No  | 2     |
| Yes | 27    |

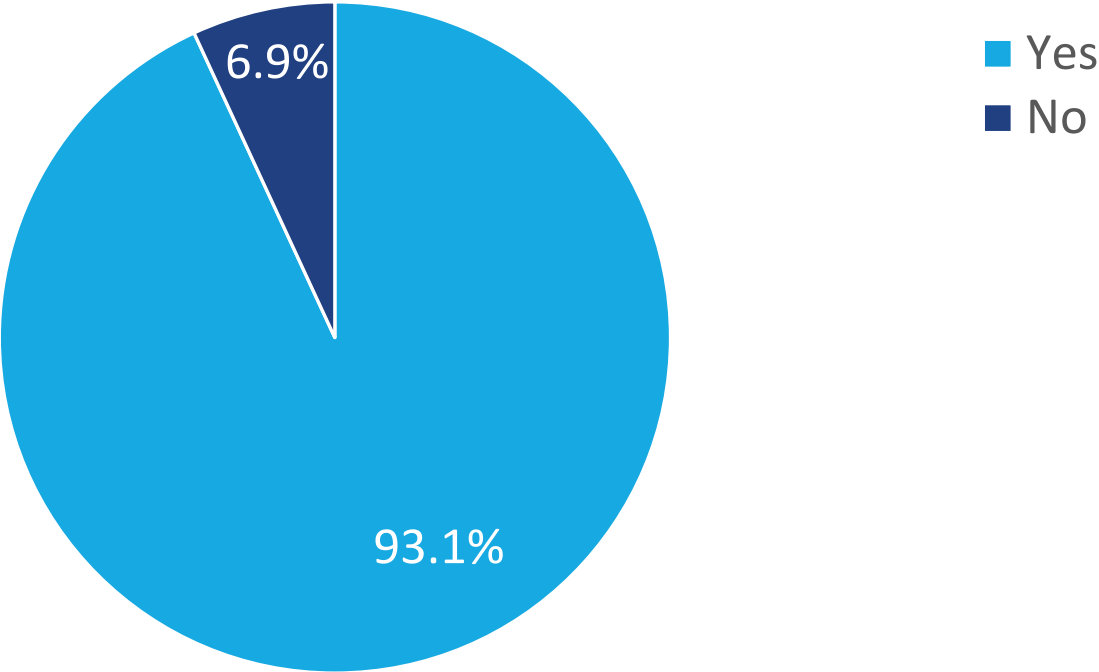

Question 10: What is your preferred treatment in addition to ADT in patients with high-volume metastatic (M1) castration-sensitive/naïve prostate cancer (CSPC/CNPC) relapsing after local treatment of the primary tumour?

| Opt | Votes |
|-----|-------|
| ■   | 9     |
| ■   | 20    |

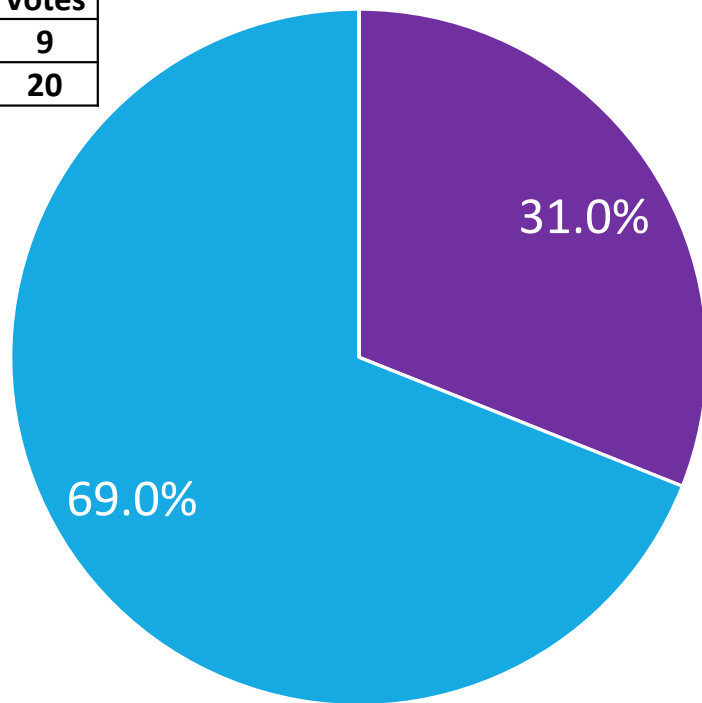

- Any one of docetaxel or abiraterone or apalutamide or enzalutamide
- AR pathway inhibitor (abiraterone or apalutamide or enzalutamide)
- Docetaxel
- Docetaxel plus AR pathway inhibitor (abiraterone or apalutamide or enzalutamide)
- NSAA

Question 11: What is your preferred treatment in addition to ADT in patients with de-novo low-volume metastatic (M1) castration-sensitive/naïve prostate cancer (CSPC/CNPC) without symptoms from the primary tumour?

| Opt | Votes |
|-----|-------|
| ■   | 1     |
| ■   | 28    |

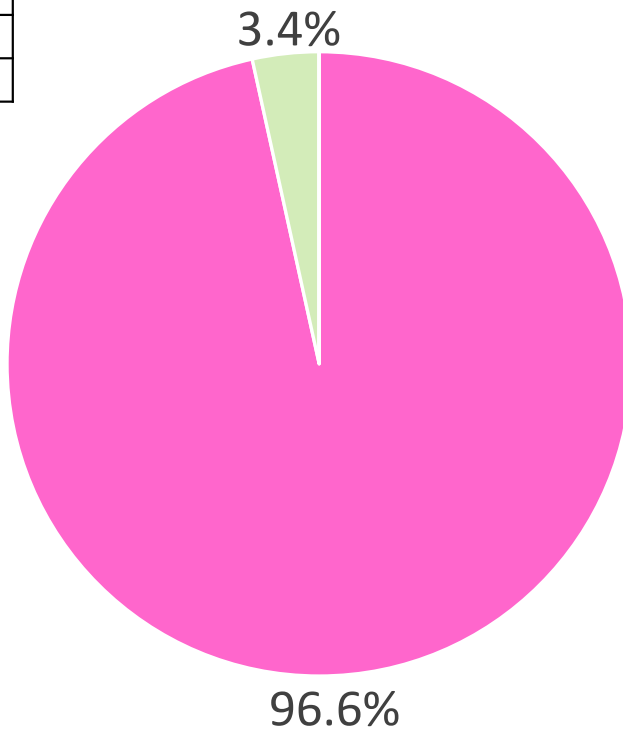

- AR pathway inhibitor + Treatment of the primary
- Treatment of the primary alone
- AR pathway inhibitor (apalutamide or enzalutamide)
- Docetaxel
- Any one of docetaxel or AR pathway inhibitor (apalutamide or enzalutamide)
- NSAA
- No additional treatment



Question 12: Do you recommend using docetaxel followed by AR pathway inhibitor in patients with mCNPC or mCSPC?

| Opt | Votes |
|-----|-------|
| ■   | 6     |
| ■   | 22    |
| ■   | 1     |

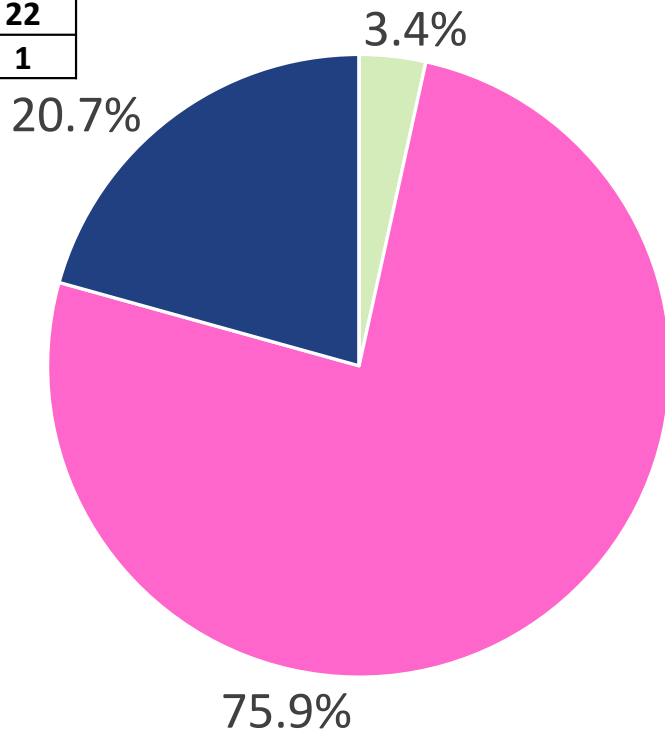

- Yes, in select patients who do not reach undetectable PSA (<0.2) within 6 months of initiating docetaxel
- No
- Yes, in select patients, aligned to criteria from TITAN and ARCHES (docetaxel up to 6 cycles followed by AR pathway inhibitor in patients with no evidence of progression)
- Yes, in the majority of patients

Question 13: What is your preferred treatment in addition to ADT in patients with low-volume metastatic (M1) castration-sensitive/naïve prostate cancer (CSPC/CNPC) relapsing after local treatment of the primary tumour?

| Opt | Votes |
|-----|-------|
|     | 29    |

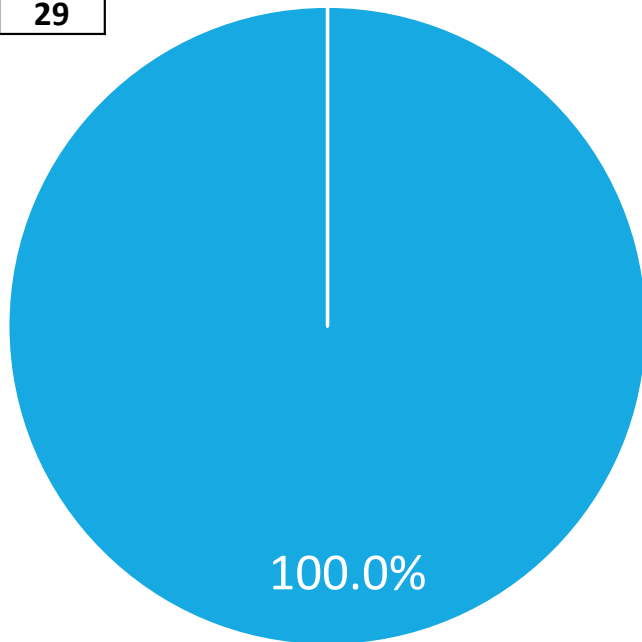

- AR pathway inhibitor (e.g. apalutamide or enzalutamide)
- Docetaxel
- Any one of docetaxel or AR pathway inhibitor
- Docetaxel plus an AR pathway inhibitor
- NSAA
- No additional treatment

Outside of clinical trials would you consider metastases directed therapy in low volume patients particularly if they are having lots of symptoms from their ARATs or systemic therapies?

| Opt | Votes |
|-----|-------|
| No  | 6     |
| Yes | 23    |

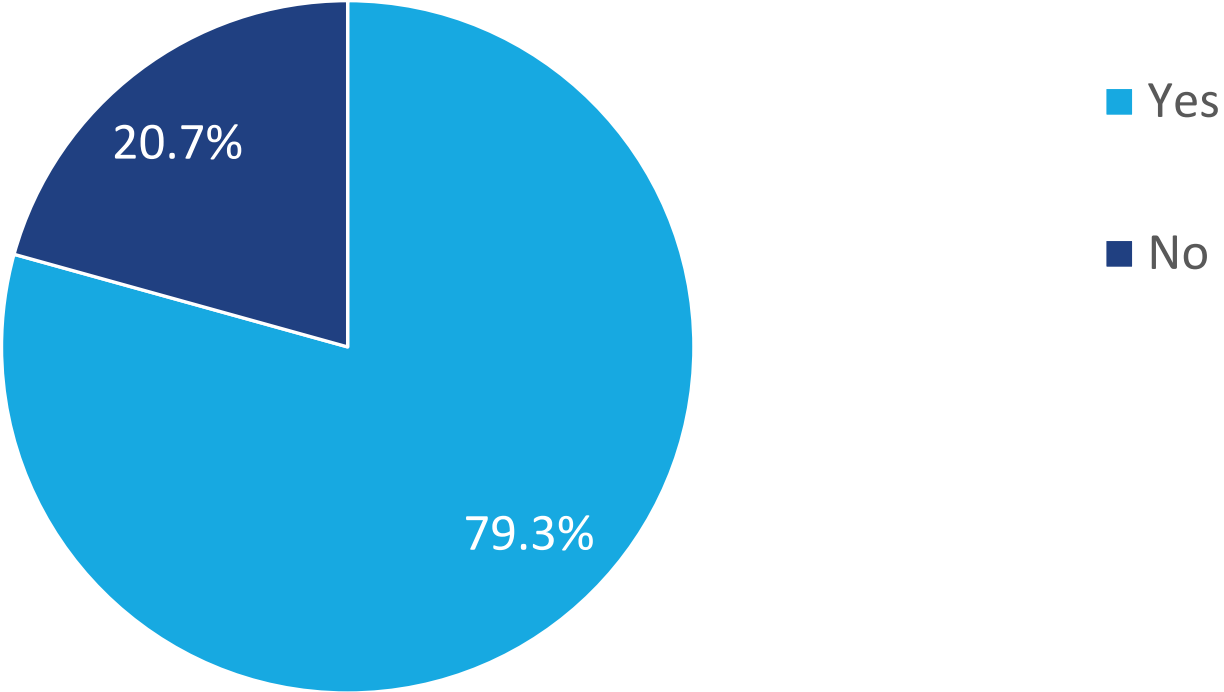

Question 14: For a patient with de novo high-volume and/or high-risk metastatic (M1) castration-sensitive/naïve prostate cancer (CSPC/CNPC), Gleason score =9, multiple liver metastases and/or lytic bone metastases, and a low PSA value (<20) but no histopathological evidence of small cell carcinoma, what do you recommend in addition to ADT?

| Opt        | Votes |
|------------|-------|
| Dark Blue  | 13    |
| Purple     | 13    |
| Light Blue | 25    |
| Pink       | 10    |

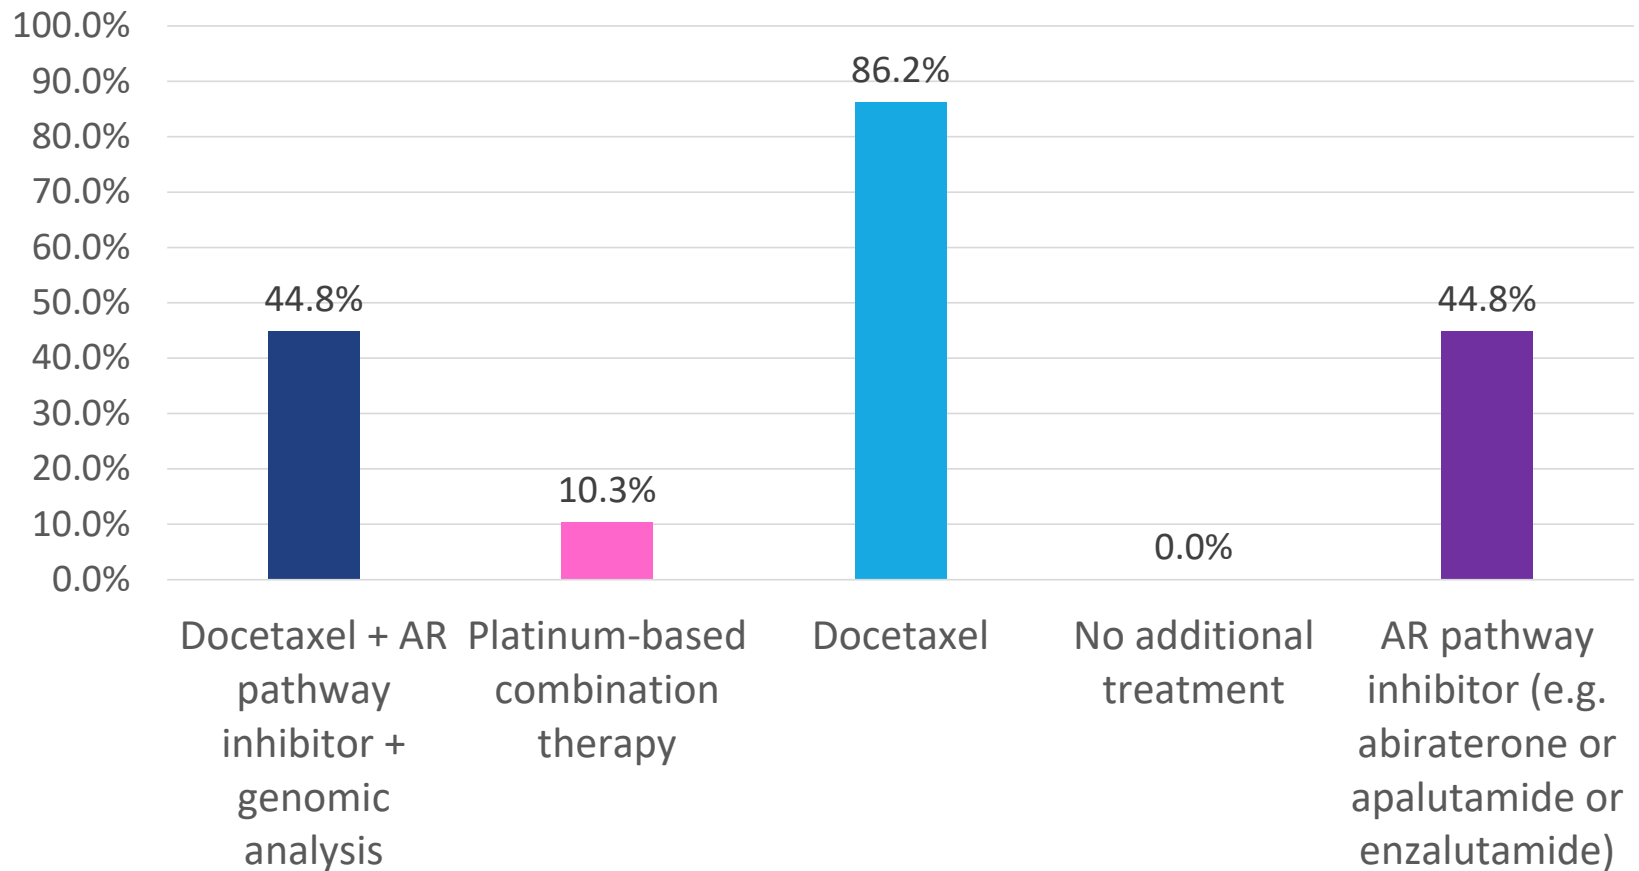

Question 14a: For a patient with de novo high-volume and/or high-risk metastatic (M1) castration-sensitive/naïve prostate cancer (CSPC/CNPC), Gleason score =9, multiple liver metastases and/or lytic bone metastases, and a low PSA value (<20) but no histopathological evidence of small cell carcinoma, what is your preferred treatment option?

| Opt | Votes |
|-----|-------|
| ■   | 25    |
| ■   | 1     |
| ■   | 3     |

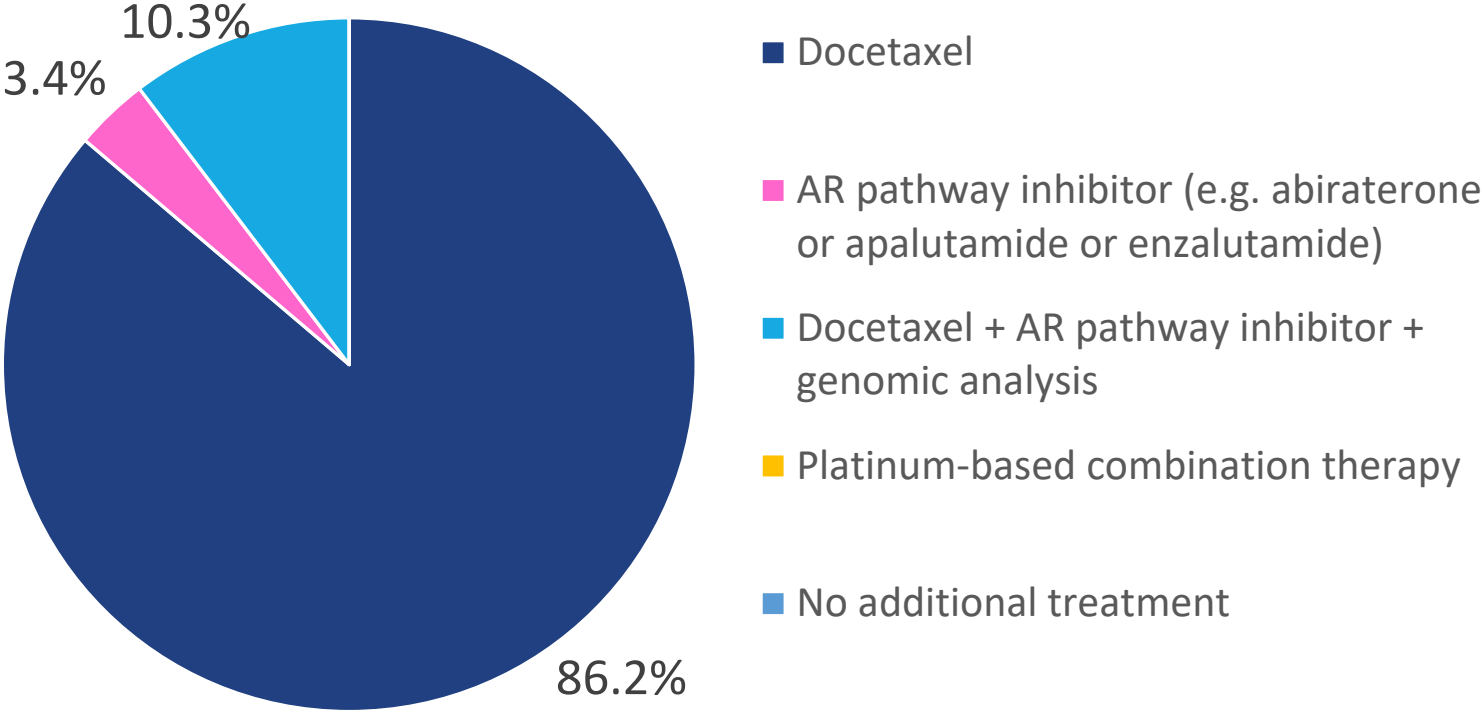

Question 15: When do you monitor patients who are receiving treatment for newly diagnosed metastatic (M1) castration-sensitive/naïve prostate cancer (CSPC/CNPC)?

| Opt | Votes |
|-----|-------|
| ■   | 19    |
| ■   | 5     |
| ■   | 5     |

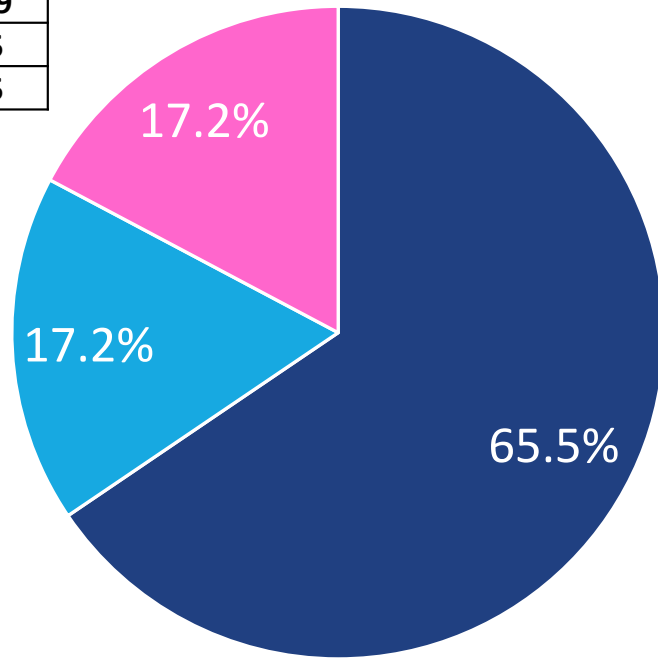

- Baseline imaging, followed by imaging at best response (i.e. 6-12 months), PSA monitoring for progression, further imaging at progression
- Baseline imaging, followed by imaging every 3-6 months, monitoring of PSA for progression
- Baseline imaging, followed by PSA monitoring for progression, further imaging only at progression

Question 16: For the majority of patients with newly diagnosed low-volume metastatic (M1) castration-sensitive/naïve prostate cancer (CSPC/CNPC) based on conventional imaging, what additional imaging modalities do you use to guide the decision to treat the primary?

| Opt | Votes |
|-----|-------|
| ■   | 28    |
| ■   | 1     |

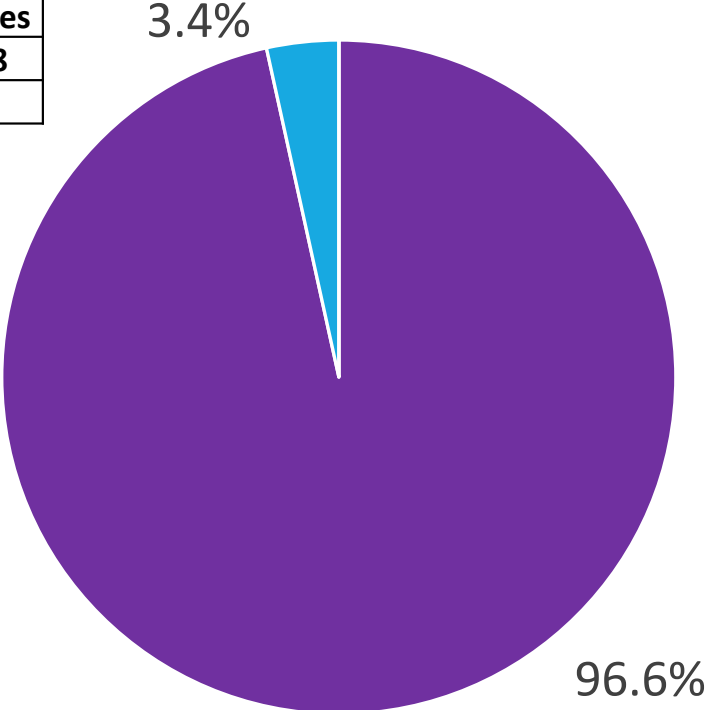

- No further imaging, CT and bone scintigraphy are sufficient
- PSMA PET CT/MRI
- Whole-body MRI without PET

Question 17: Which definition of oligometastatic prostate cancer is useful to guide metastasis-directed ablative therapy?

| Opt | Votes |
|-----|-------|
| ■   | 23    |
| ■   | 6     |

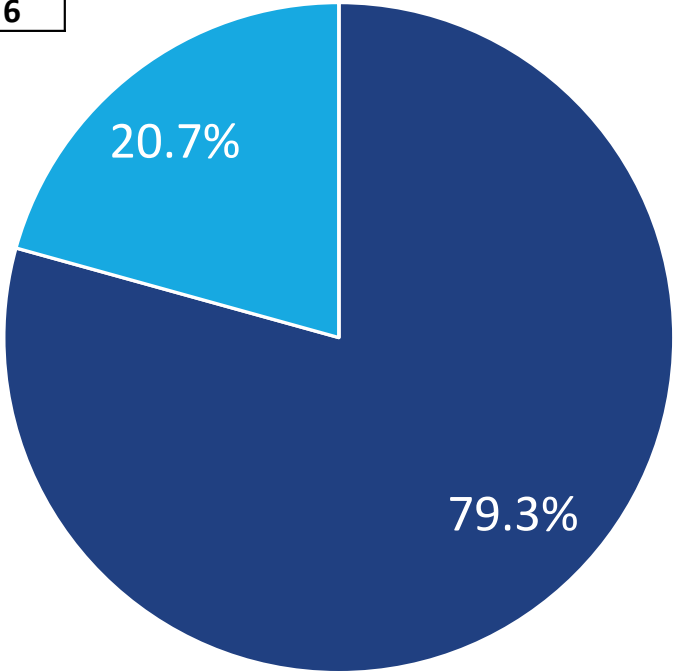

- No further imaging, CT and bone scintigraphy are sufficient
- PSMA PET CT/MRI
- Whole-body MRI without PET



Question 18: For treatment decisions, is it important to distinguish de-novo treatment-naïve (synchronous) oligometastatic prostate cancer from oligometastatic prostate cancer recurring after local therapy (metachronous)?

| Opt | Votes |
|-----|-------|
| No  | 20    |
| Yes | 9     |

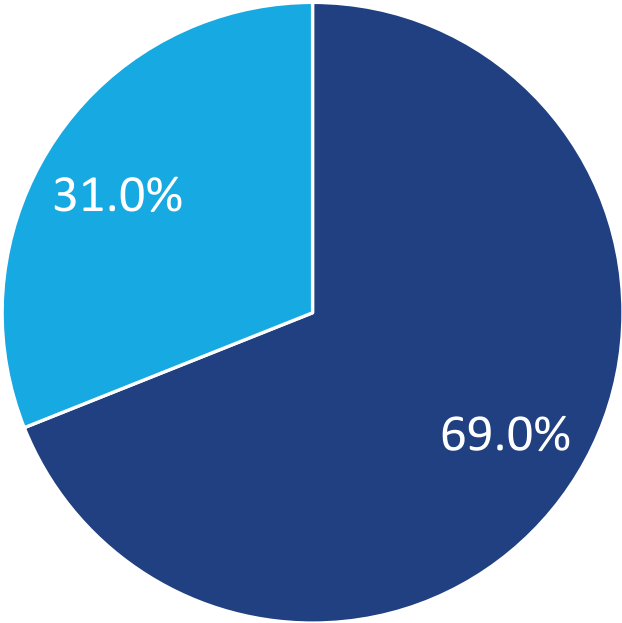

■ No ■ Yes

Question 19: In addition to ADT, what is your recommended treatment approach for the majority of patients with oligometastatic CNPC/CSPC with an untreated primary?

| Opt | Votes |
|-----|-------|
| 1   | 1     |
| 25  | 25    |
| 3   | 3     |

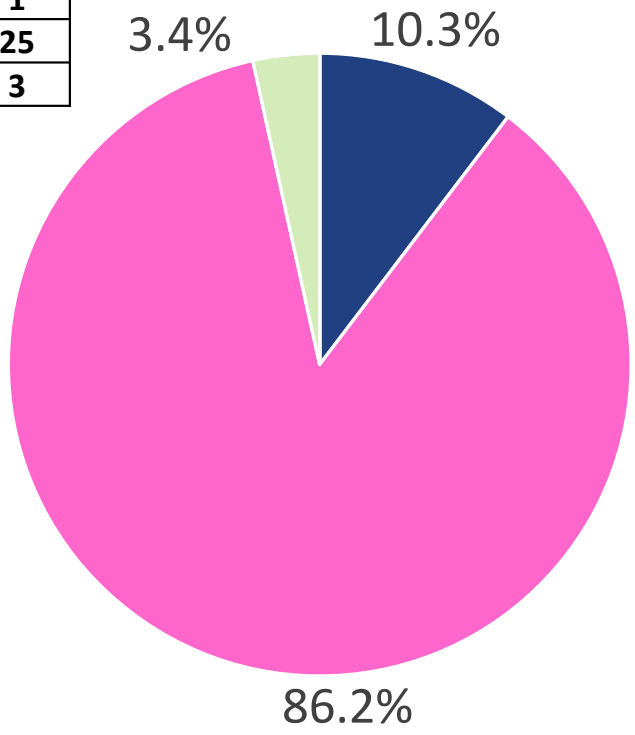

- AR pathway inhibitor + Treatment of the primary + Metastasis-directed ablative treatment of all lesions
- AR pathway inhibitor + Treatment of the primary
- Treatment of the primary alone
- AR Pathway inhibitor (apalutamide or enzalutamide)
- Treatment of the primary + Metastasis-directed ablative treatment of all lesions
- No additional treatment

Question 20: For treatment decisions in untreated de-novo oligometastatic prostate cancer, is it important to distinguish lymph node-only disease from disease that includes metastatic lesions at other sites?

| Opt | Votes |
|-----|-------|
| ■   | 7     |
| ■   | 22    |

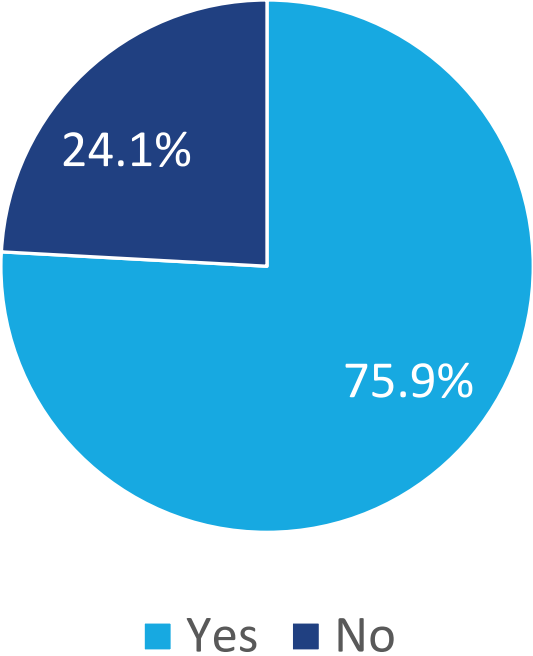

Question 21: Based on the current evidence, do you think that local treatment of metastatic lesions (metastasis directed therapy) in treatment-naïve oligometastatic prostate cancer confers?

| Opt | Votes |
|-----|-------|
| ■   | 1     |
| ■   | 25    |
| ■   | 3     |

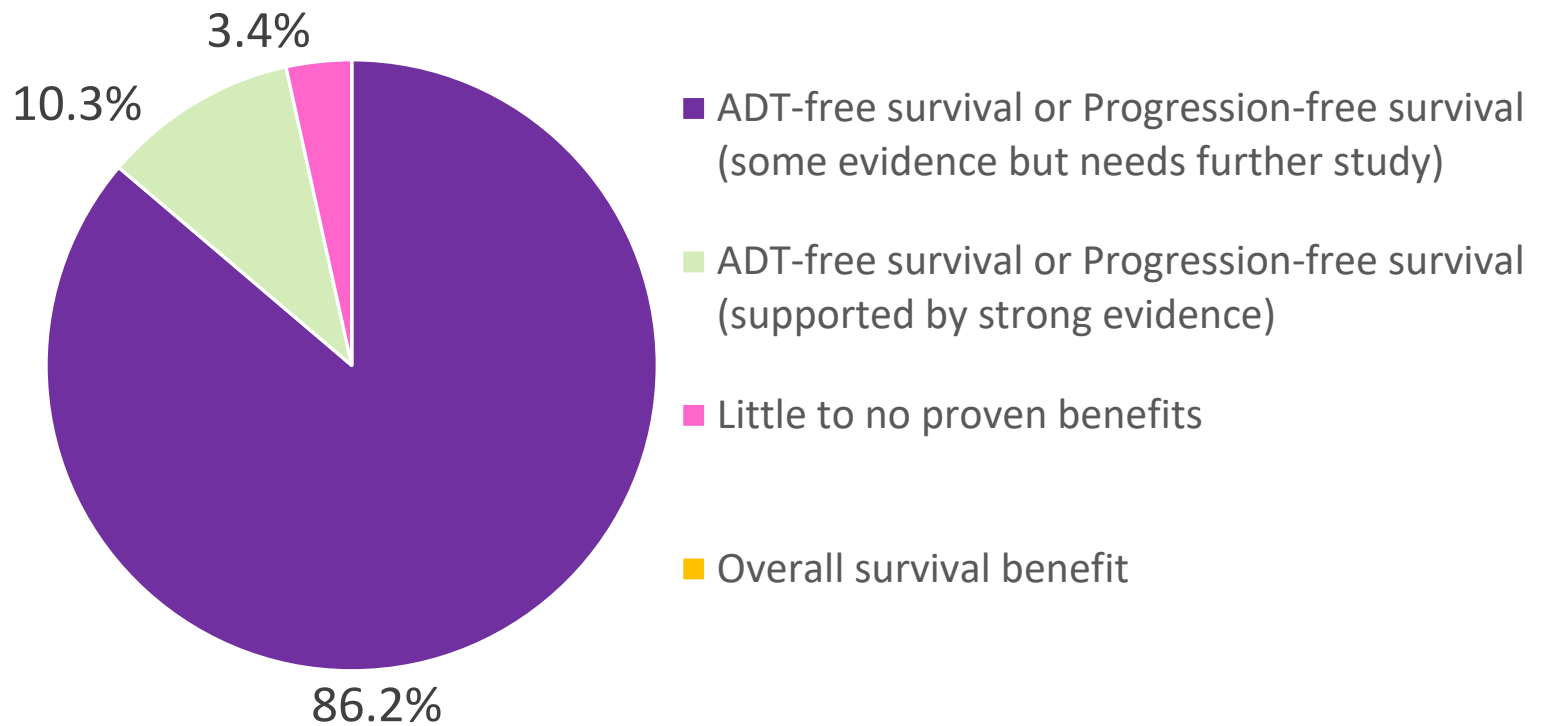

Question 22: Do you recommend metastasis-directed ablative treatment of all lesions instead of systemic therapy (ADT +/- ARAT) in oligometastatic prostate cancer (no prior systemic treatment)?

| Opt | Votes |
|-----|-------|
| ■   | 4     |
| ■   | 25    |

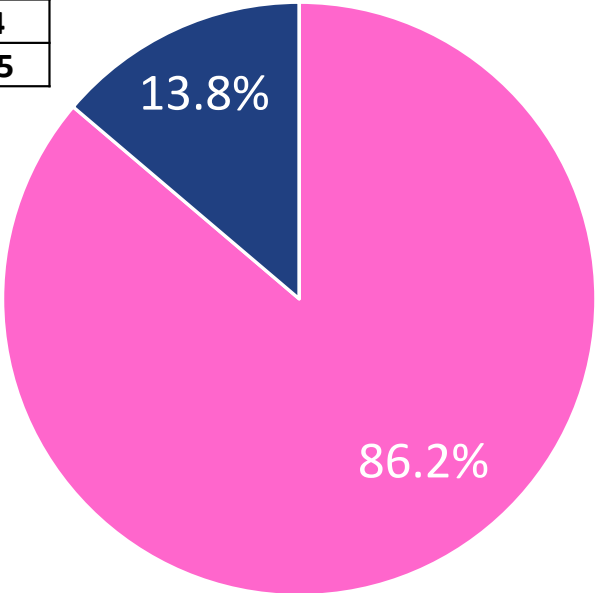

- No or very rarely
- Yes, in a minority of patients
- Yes, in the majority of patients

Question 23: What is your treatment goal when recommending metastasis-directed ablative treatment of all lesions instead of systemic therapy (ADT+/-ARAT) in oligometastatic prostate cancer (no prior systemic therapy)?

| Opt | Votes |
|-----|-------|
| ■   | 13    |
| ■   | 9     |
| ■   | 7     |

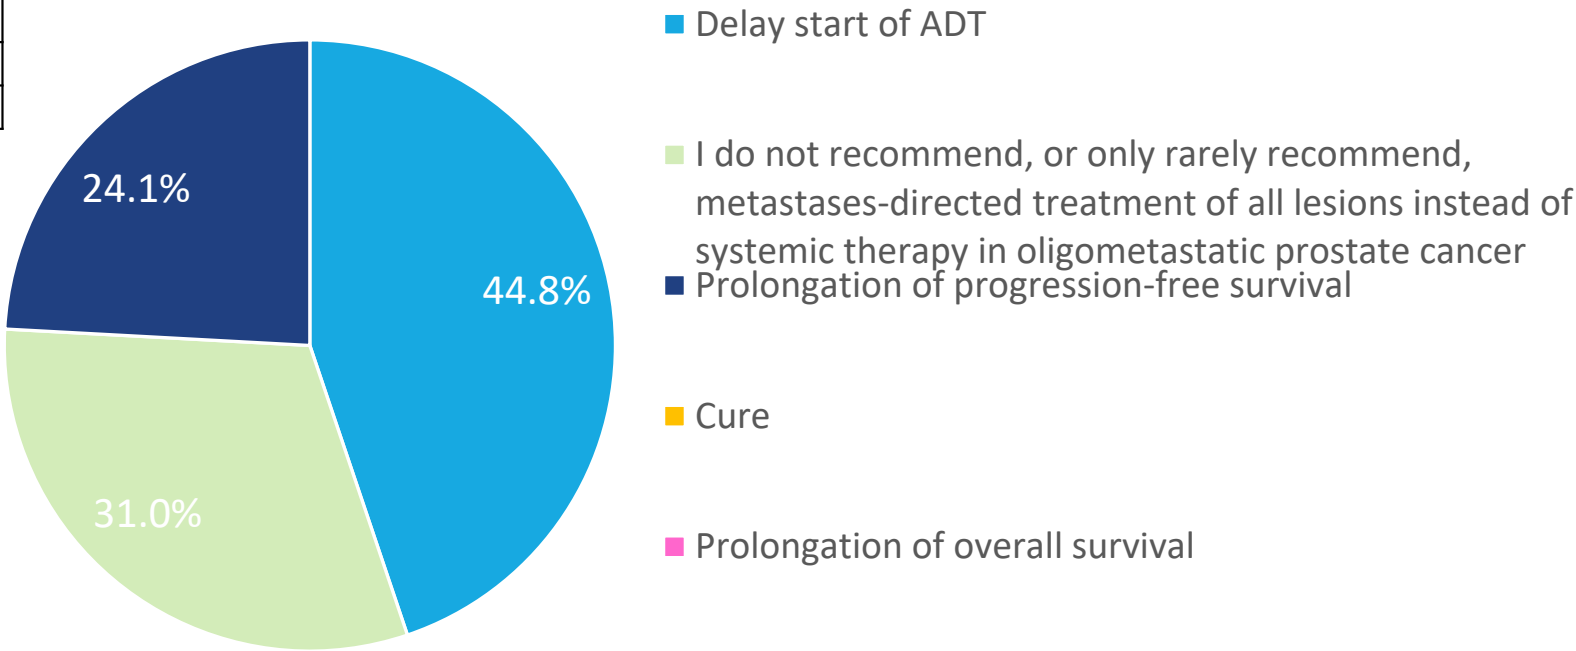

Question 24: Do you recommend metastasis-directed ablative treatment of all lesions in addition to systemic therapy (ADT+/-ARAT) in oligometastatic prostate cancer (no prior systemic treatment)?

| Opt | Votes |
|-----|-------|
| ■   | 4     |
| ■   | 8     |
| ■   | 17    |

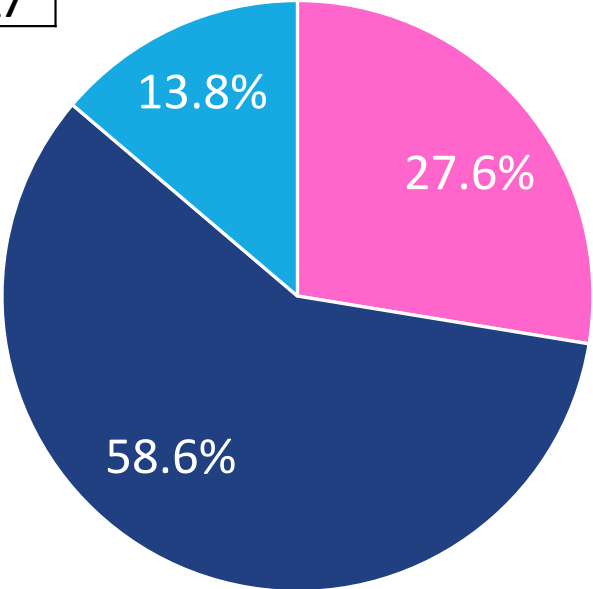

- No or very rarely
- Yes, in a minority of patients
- Yes, in the majority of patients

Question 25: What is your treatment goal when recommending adding metastasis-directed ablative treatment of all lesions to systemic treatment (ADT+/-ARAT) in oligometastatic prostate cancer?

| Opt | Votes |
|-----|-------|
| ■   | 24    |
| ■   | 2     |
| ■   | 3     |

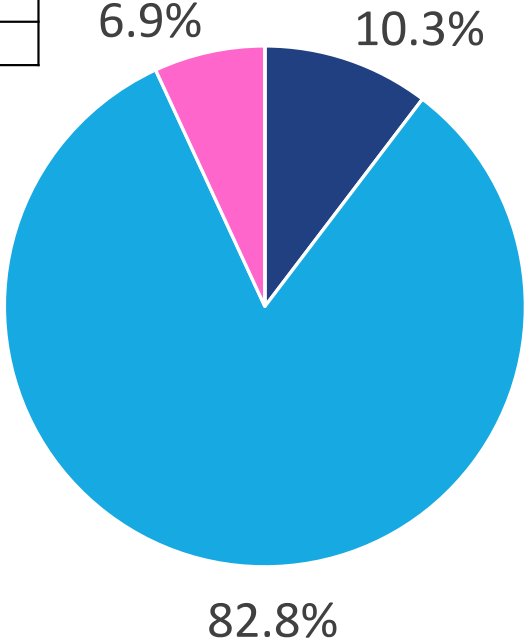

- Prolongation of overall survival
- Prolongation of progression-free survival
- I do not recommend, or only rarely recommend, metastasis-directed treatment of all lesions in oligometastatic prostate cancer
- Cure



Question 26: What is your cut-off for the number of metastases when considering prostate cancer to be oligometastatic to guide treatment decisions regarding metastasis-directed ablative treatment of all lesions? Does location of metastatic lesions impact your decision? Please choose all correct responses.

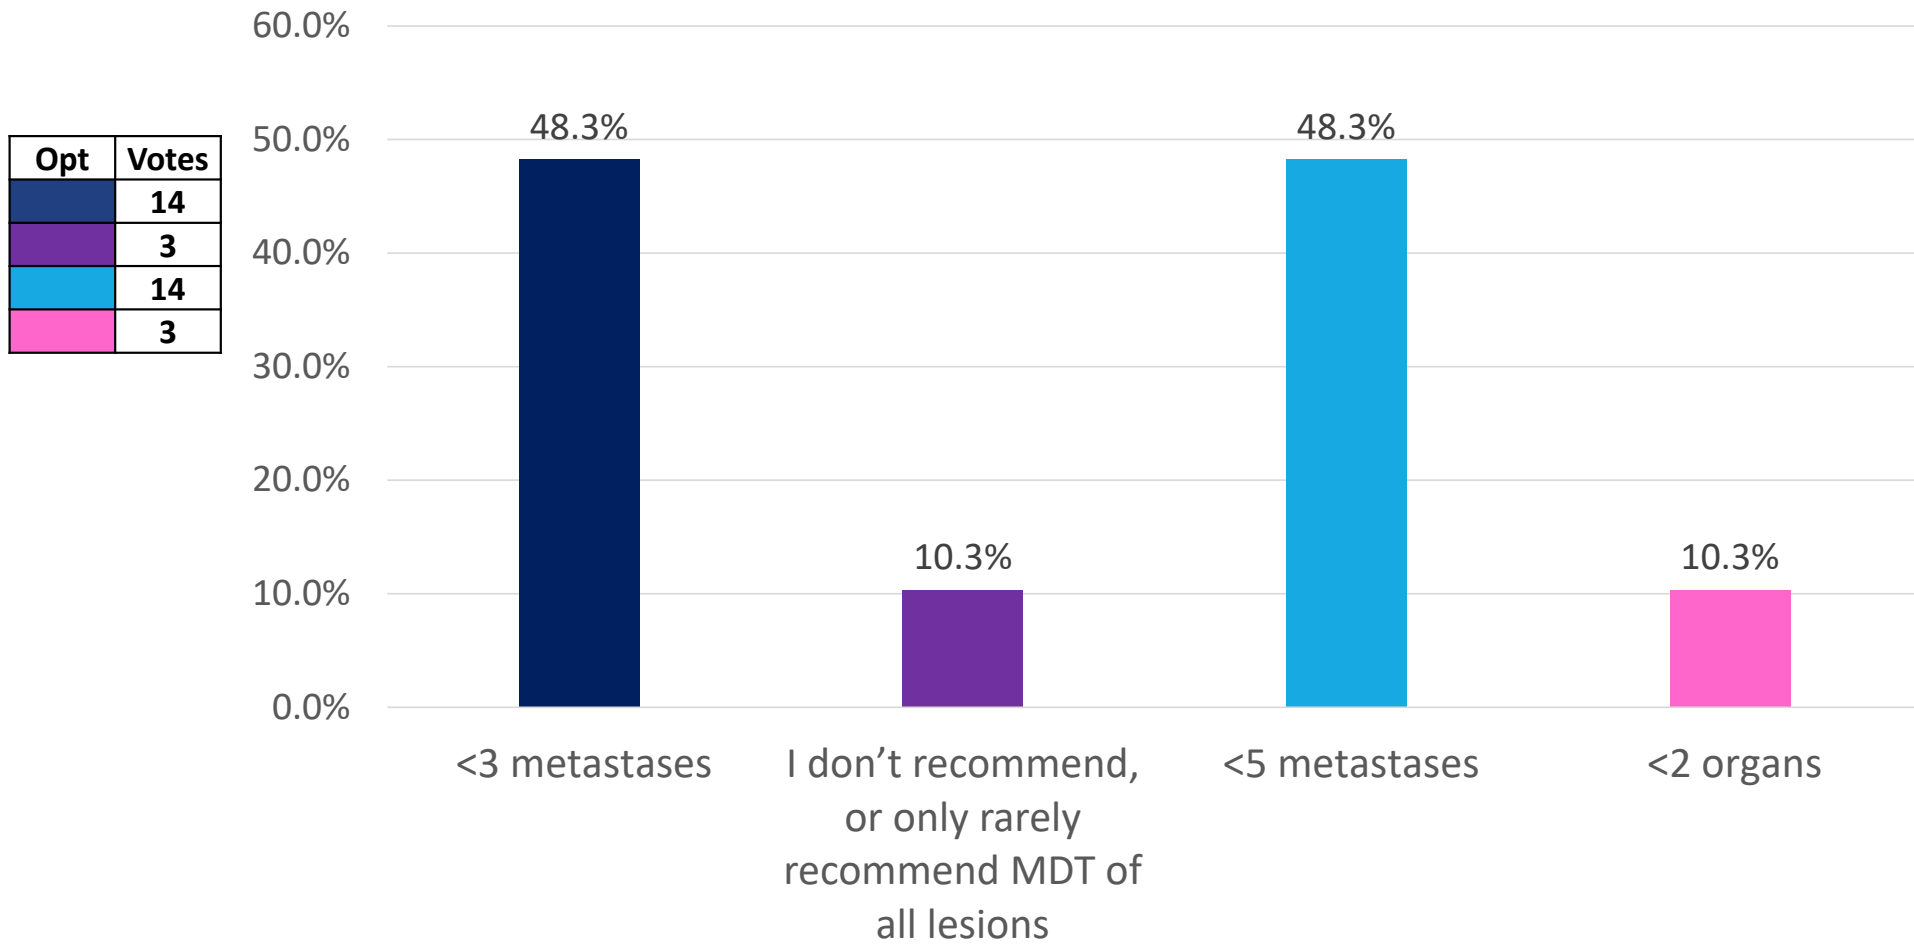

| Opt        | Votes |
|------------|-------|
| Dark Blue  | 14    |
| Purple     | 3     |
| Light Blue | 14    |
| Pink       | 3     |

Question 27: Is imaging by CT and bone scintigraphy sufficient to define the oligometastatic state for treatment planning?

| Opt   | Votes |
|-------|-------|
| ■ Yes | 14    |
| ■ No  | 14    |

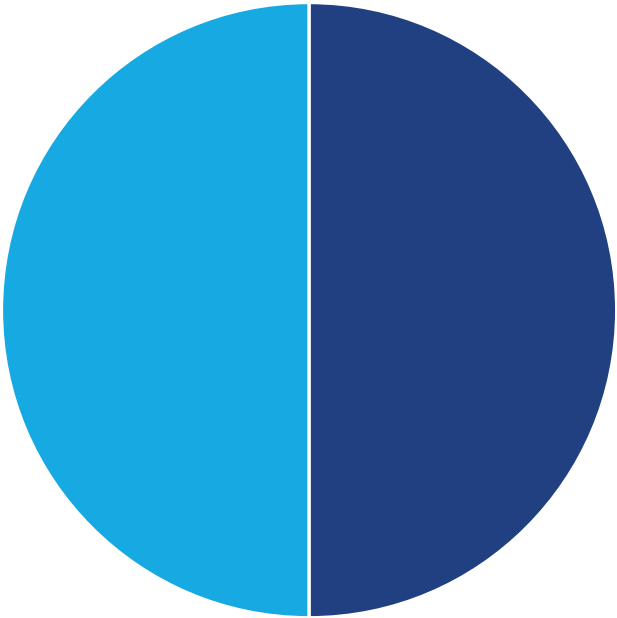

■ Yes ■ No

Question 28: Does your management strategy change if you have a PSMA PET positive result that shows low volume metastatic disease for a patient who is negative for metastases on conventional imaging (CT/Bone Scan) result?

| Opt | Votes |
|-----|-------|
| ■   | 4     |
| ■   | 25    |

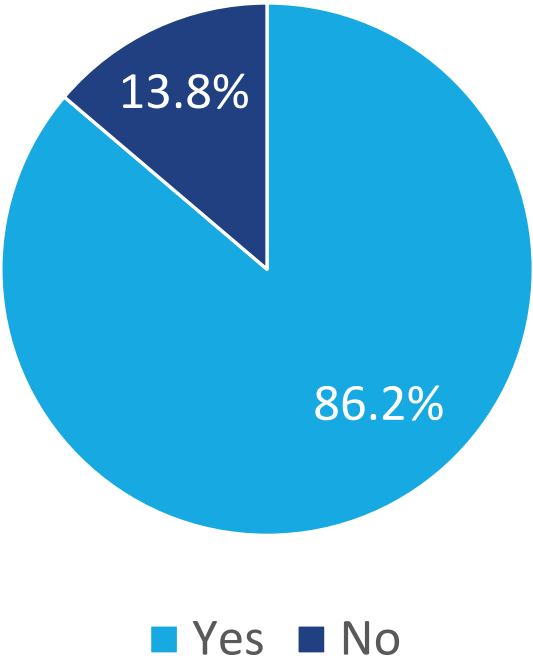

Question 29: Does your management strategy change if you have a PSMA PET result that shows high volume metastatic disease for a patient with low volume metastatic disease on conventional imaging (CT/Bone Scan)?

| Opt | Votes |
|-----|-------|
| ■   | 14    |
| ■   | 15    |

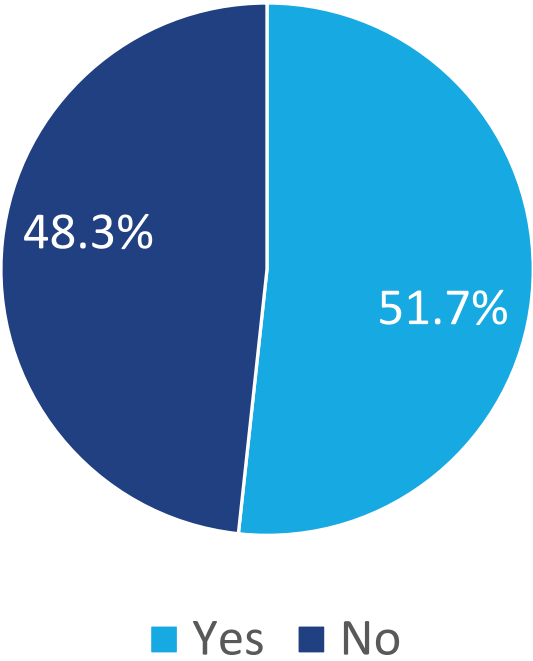

Question 30: If patients with low volume disease based on conventional imaging undergoes advanced imaging, with results that are consistent with high volume disease criteria, how do you select systemic therapy for the majority of those patients?

| Opt | Votes |
|-----|-------|
| ■   | 15    |
| ■   | 14    |

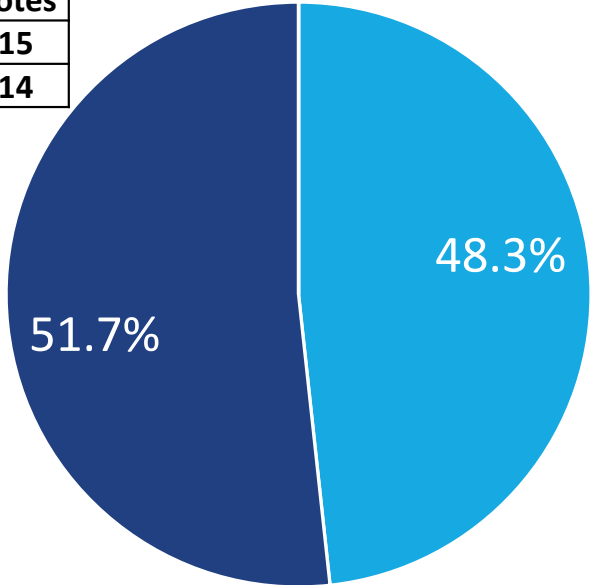

- Treat patient as high-volume disease
- Treat patient as low-volume disease
- Treat patient as all-comer population. Advanced imaging doesn't change my treatment
- Treat with ADT alone

Question 31: In addition to ADT, what is your recommended treatment approach for the majority of patients with an untreated primary, who is non-metastatic based on conventional imaging, but has de novo oligometastatic prostate cancer on advanced imaging (PET)?

| Opt | Votes |
|-----|-------|
| ■   | 5     |
| ■   | 16    |
| ■   | 3     |
| ■   | 5     |

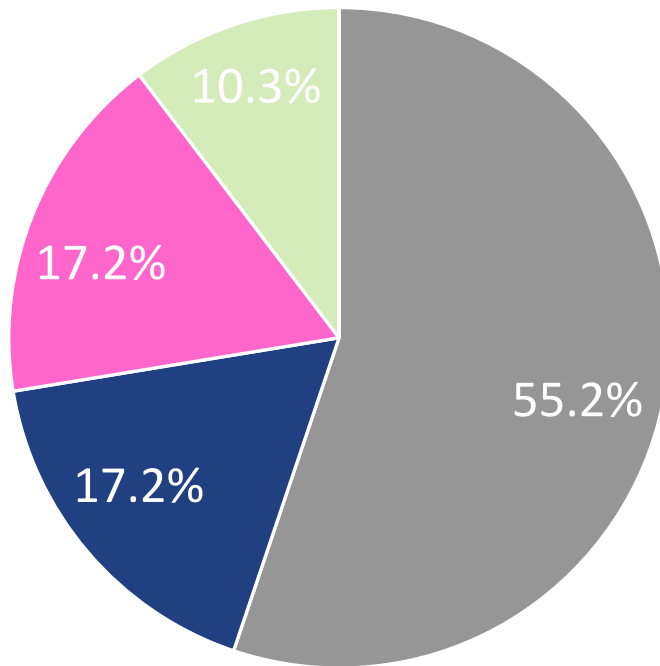

- AR pathway inhibitor + Treatment of the primary
- Treatment of the primary alone
- AR pathway inhibitor + Treatment of the primary + Metastasis-directed ablative treatment of all lesions
- Treatment of the primary + Metastasis-directed ablative treatment of all lesions
- AR pathway inhibitor (apalutamide or enzalutamide)

Question 32: For patients with oligometastatic disease (synchronous or metachronous) on CT and bone scintigraphy, which confirmatory imaging modality(ies) do you use (apart from local staging) to guide planning for metastasis-directed therapy?

| Opt | Votes |
|-----|-------|
| ■   | 19    |
| ■   | 5     |
| ■   | 5     |

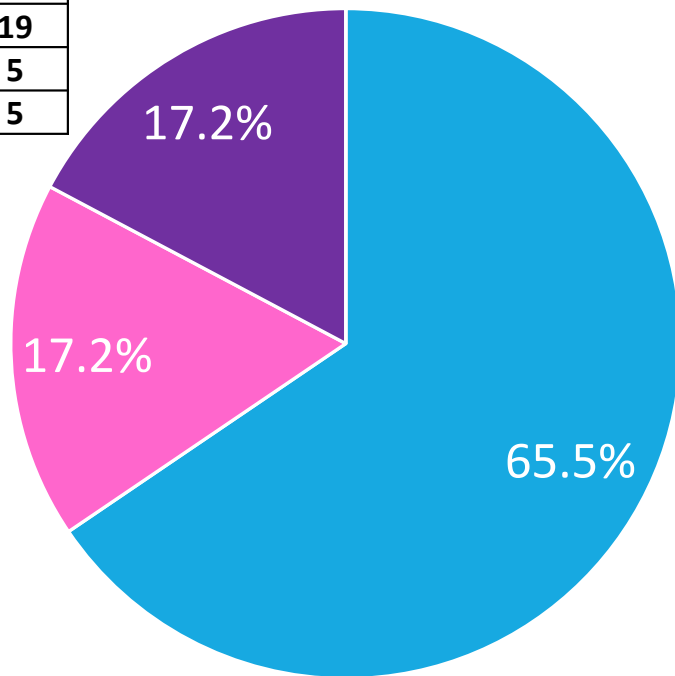

■ PSMA PET-CT/MRI

■ No additional imaging

■ I do not use, or only rarely use metastasis-directed therapy

■ Whole-body MRI without PET

Question 33: Does PET change your decision to treat the primary tumour in a patient originally classified as low-volume on conventional imaging now appears to be high volume?

| Opt | Votes |
|-----|-------|
| ■   | 9     |
| ■   | 9     |
| ■   | 11    |

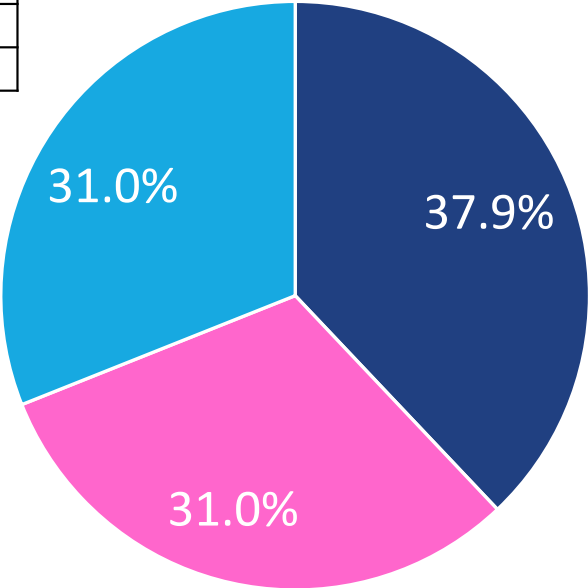

■ Yes, in a minority of patients

■ No or very rarely

■ Yes, in the majority of patients



Question 34: What is your recommended treatment approach for the majority of patients with oligorecurrent (metachronous) oligometastatic prostate cancer?

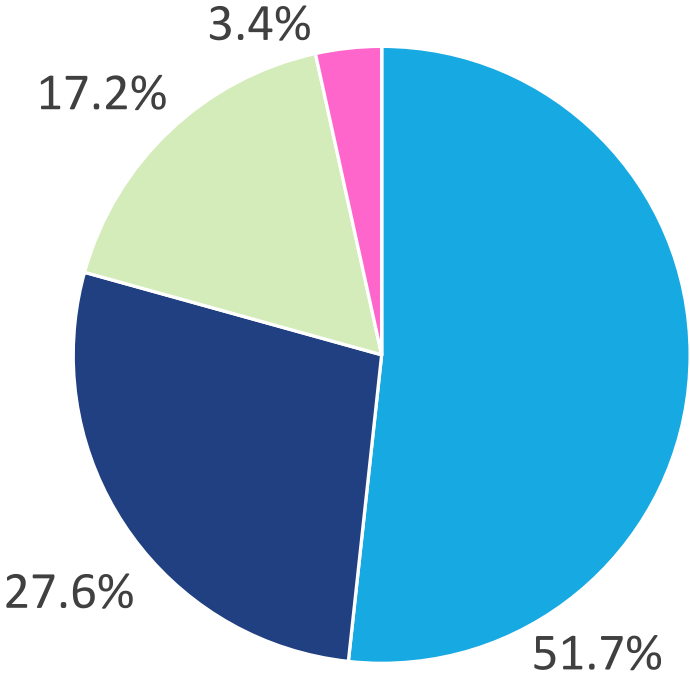

- AR pathway inhibitor + ADT
- AR pathway inhibitor + Metastasis-directive ablative therapy of lesions + ADT
- Metastasis-directed ablative therapy of lesions + ADT
- Metastasis directed ablative therapy alone to delay ADT
- ADT alone

| Opt | Votes |
|-----|-------|
| ■   | 8     |
| ■   | 5     |
| ■   | 1     |
| ■   | 15    |

Question 35: What is your recommended treatment approach for the majority of patients with oligorecurrent oligometastatic disease, who is non-metastatic based on conventional imaging, but has low-volume oligorecurrent oligometastatic prostate cancer on advanced imaging (PET or MRI)?

| Opt | Votes |
|-----|-------|
| ■   | 2     |
| ■   | 12    |
| ■   | 4     |
| ■   | 11    |

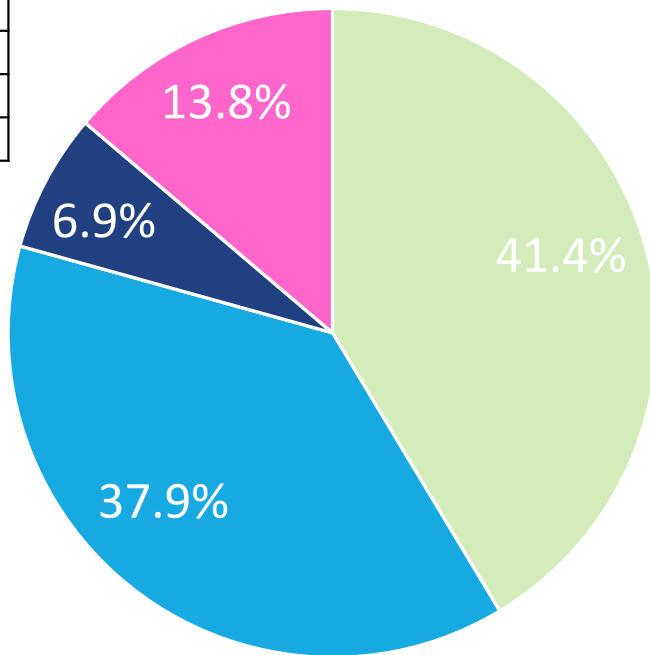

- Metastasis-directed ablative therapy of lesions + ADT
- AR pathway inhibitor + ADT
- AR pathway inhibitor + Metastasis-directive ablative therapy of lesions + ADT
- ADT alone

Question 36: What is the most useful definition of oligoprogressive prostate cancer?

| Opt | Votes |
|-----|-------|
|     | 3     |
|     | 4     |
|     | 22    |

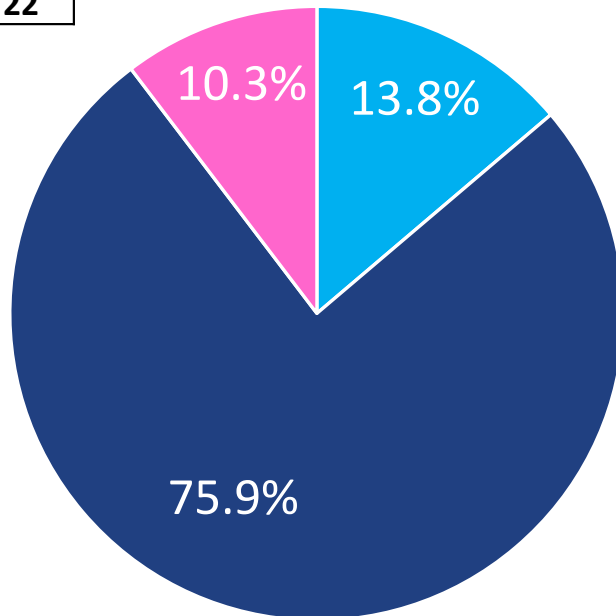

- I do not believe that oligoprogressive prostate cancer is a meaningful clinical entity
- A limited number of progressing pre-existing or new lesion(s) in a patient with metastatic disease that is otherwise stable/treatment-responsive
- A single progressing pre-existing or new lesion in a patient with metastatic disease that is otherwise stable/treatment-responsive

Question 37: For patients with oligoprogressive metastatic chemotherapy-naïve CRPC, how do you recommend treating if there is disease progression (no visceral metastases) on a combination of ADT plus AR pathway inhibitor (abiraterone or apalutamide or enzalutamide)?

| Opt | Votes |
|-----|-------|
| ■   | 19    |
| ■   | 10    |

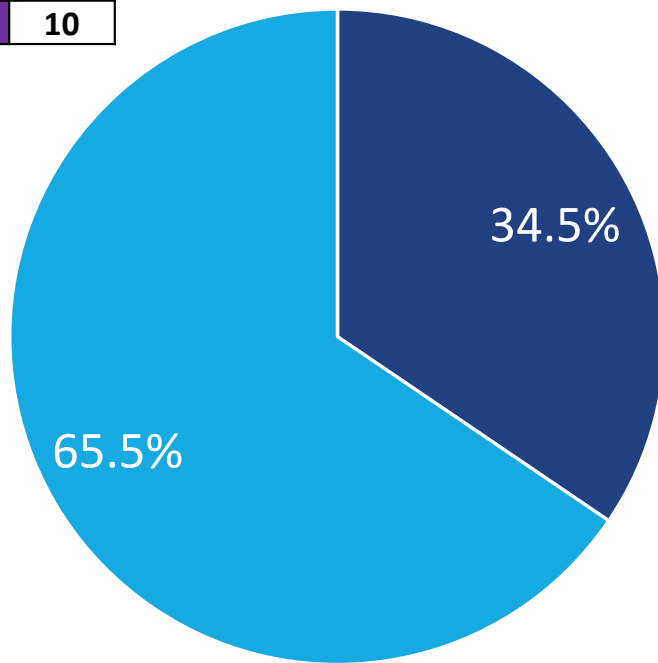

- Do not change systemic therapy; perform MDT of all progressing lesions
- Switch from current AR pathway inhibitor to another systemic therapy
- Switch from curent AR pathway to another systemic herapy and perform metastasis-directed ablative treatment of all progressive lesions

Question 38: Is there a role for AR pathway inhibitor to AR pathway inhibitor (back to back) sequencing from mCNPC/mCSPC to mCRPC, assuming no regulatory or access limitations?

| Opt | Votes |
|-----|-------|
| ■   | 6     |
| ■   | 23    |

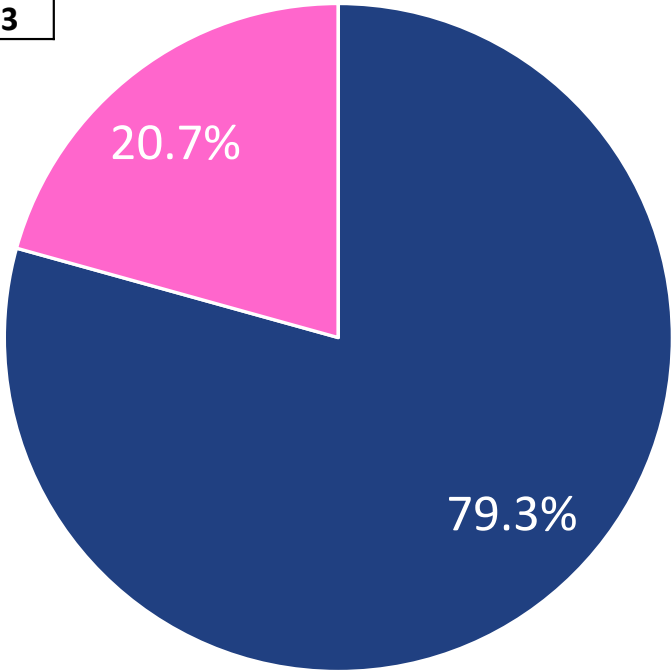

- Yes, in a minority of patients (i.e. who are ineligible or refuse other options)
- No
- Yes, in a majority of patients

Question 39: What is your preferred AR pathway inhibitor to AR pathway inhibitor sequencing strategy for patients who progress from mCNPC/mCRPC to mCRPC?

| Opt | Votes |
|-----|-------|
|     | 12    |
|     | 17    |

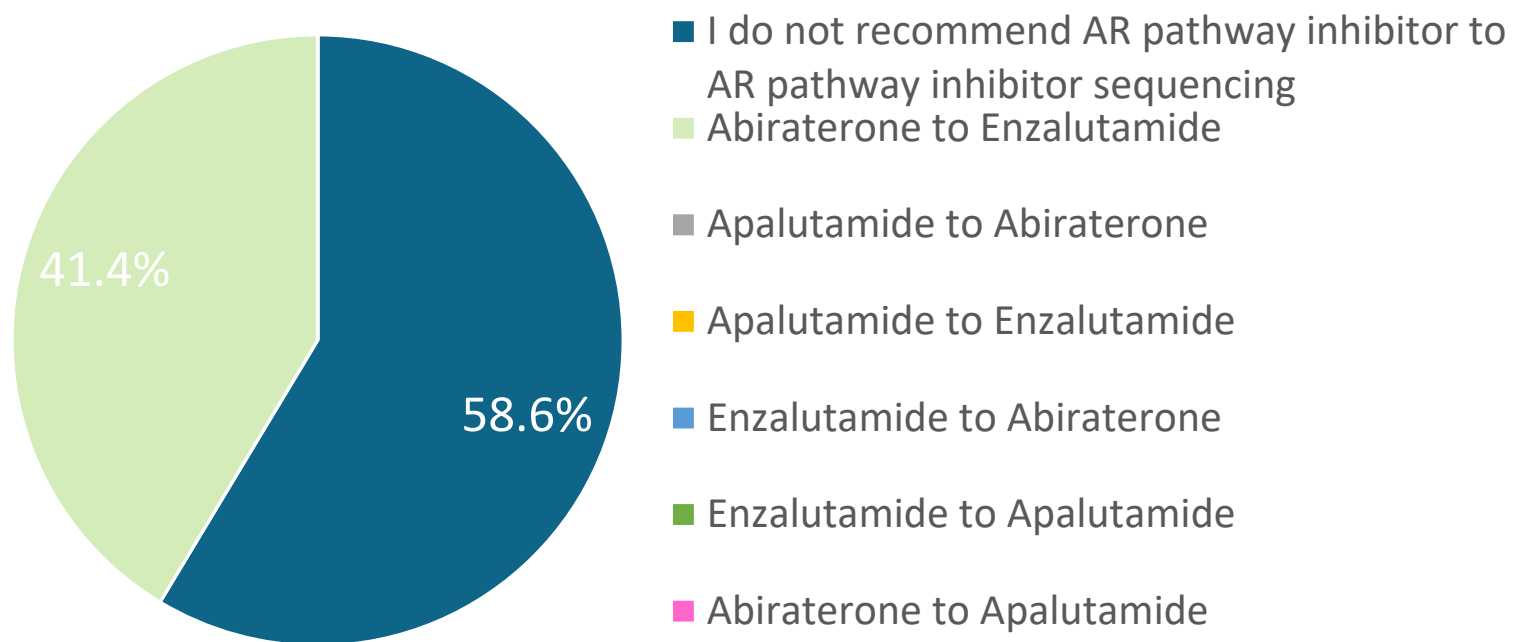

Question 40: What imaging do you use for the majority of patients to guide treatment decisions for the majority of patients with recent onset of CRPC and rising PSA in order to determine if patient is nmCRPC or mCRPC?

| Opt | Votes |
|-----|-------|
|     | 29    |

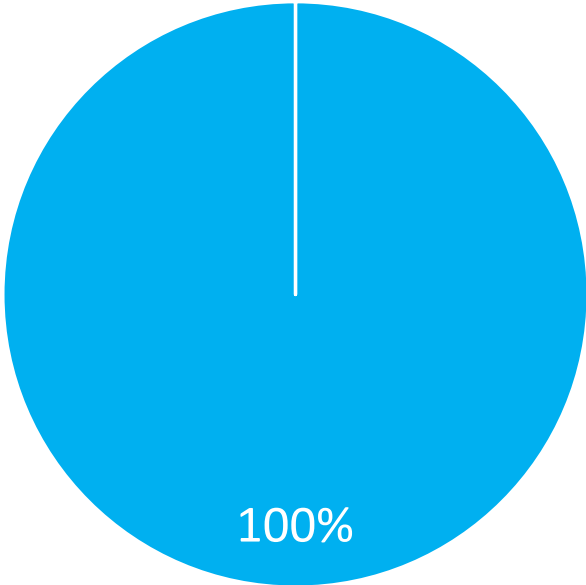

- CT and/or bone scintigraphy
- PSMA PET-CT/MRI
- Whole-body MRI without PET

Question 41: For asymptomatic nmCRPC (M0 CRPC) patients (no metastatic disease documented on past imaging) on ADT who have rising PSA and PSA doubling time  $\leq 10$  months, at what confirmed total PSA level do you recommend imaging?

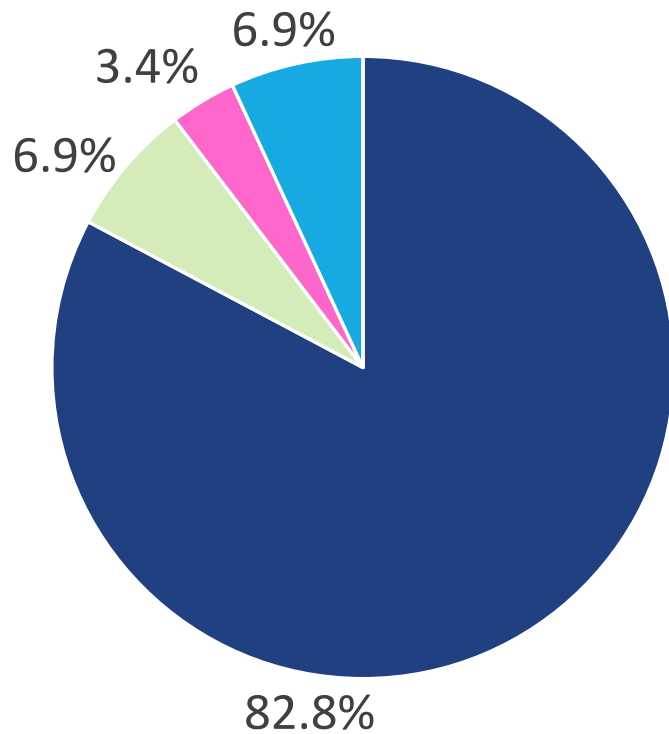

■ PSA >2 ng/mL

■ PSA >1 ng/mL

■ PSA >5 ng/mL

■ PSA >10 ng/mL

■ I do not use absolute PSA values to guide imaging

■ I do not recommend imaging these patients

| Opt                                               | Votes |
|---------------------------------------------------|-------|
| PSA >2 ng/mL                                      | 24    |
| PSA >1 ng/mL                                      | 1     |
| PSA >5 ng/mL                                      | 2     |
| I do not use absolute PSA values to guide imaging | 2     |



Question 42: In the majority of nmCRPC (M0 CRPC) patients who have PSA >2 ng/mL and PSA doubling time <10 months, what is your preferred treatment choice in addition to ADT?

| Opt | Votes |
|-----|-------|
| 1   | 1     |
| 26  | 26    |
| 2   | 2     |

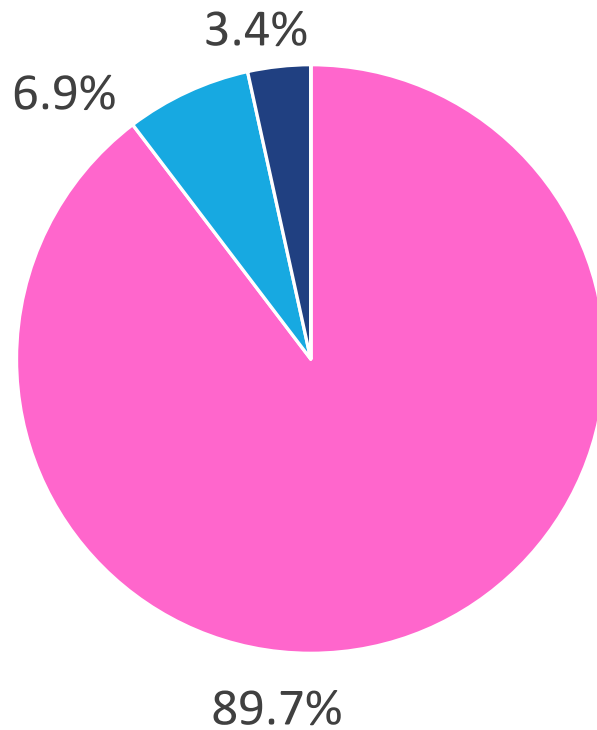

- Any AR antagonist mentioned above
- Apalutamide
- Darolutamide
- Enzalutamide
- NSAA (i.e. bicalutamide)
- No additional treatment: continue ADT alone

Question 43: The definition of CRPC includes an absolute PSA threshold of 2 ng/mL or greater. Is there a rationale to consider a lower PSA threshold that is lower than 2ng/mL to define CRPC?

| Opt | Votes |
|-----|-------|
| ■   | 21    |
| ■   | 7     |
| ■   | 1     |

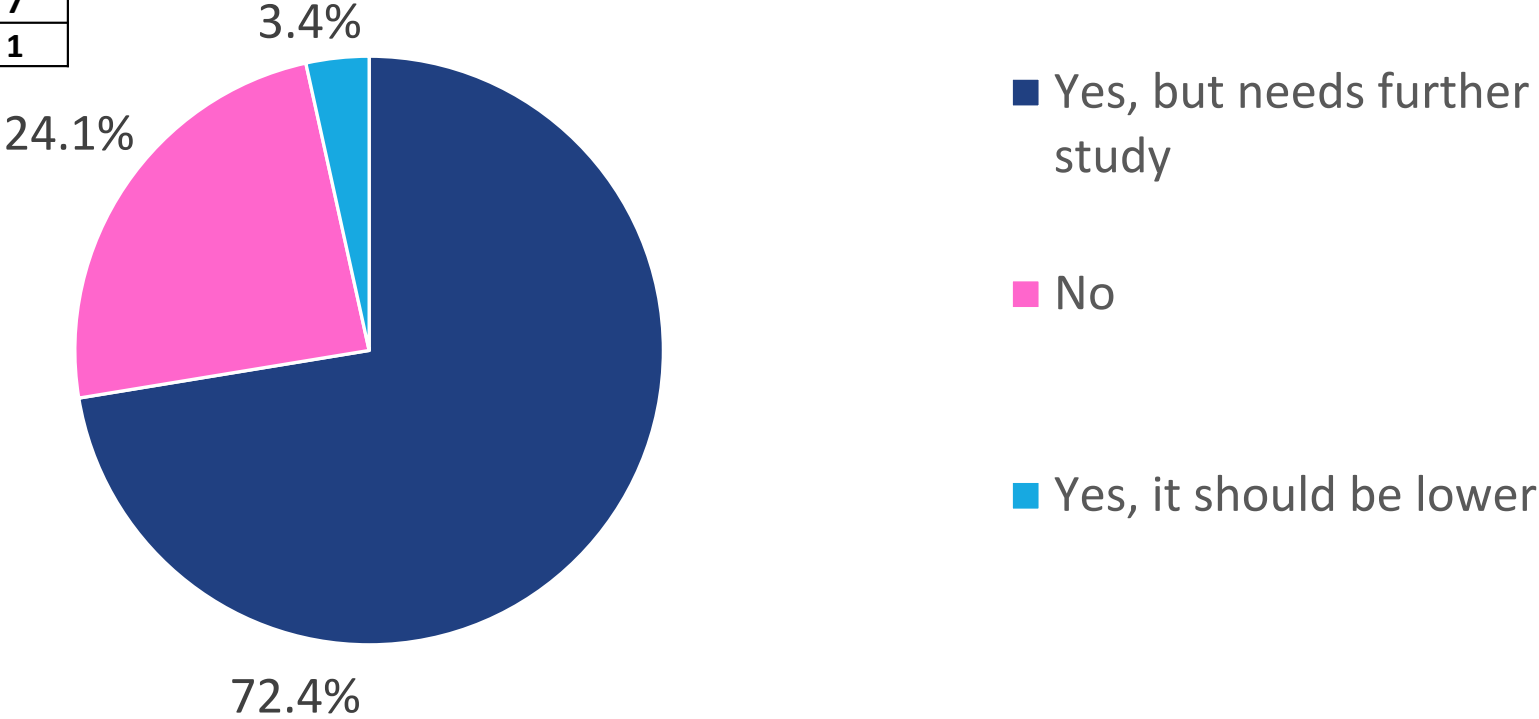

Question 44: If you treat a patient with an AR pathway inhibitor (apalutamide or darolutamide or enzalutamide) for nmCRPC (MO CRPC), at what threshold do you recommend changing treatment apart from ADT (excluding treatment changes for toxicity)?

| Opt | Votes |
|-----|-------|
| ■   | 21    |
| ■   | 7     |
| ■   | 1     |

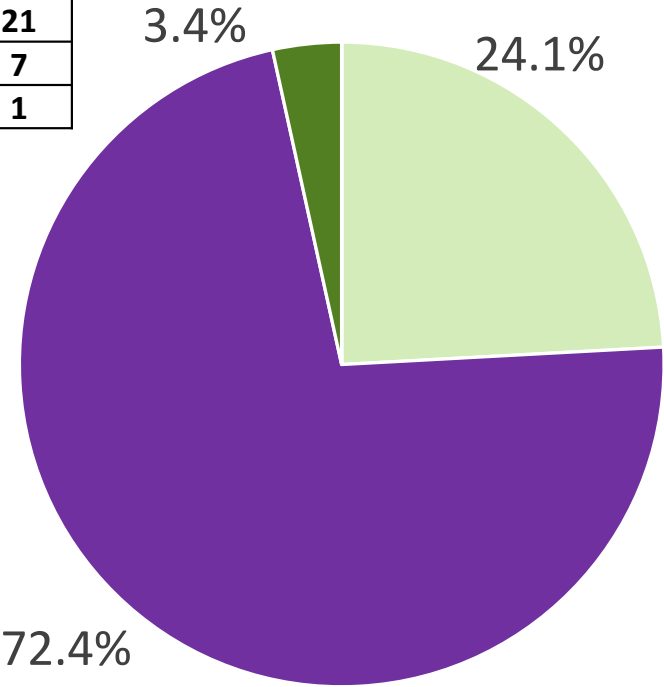

- At least 2 types of progression needs to be observed
- Occurrence of metastases alone
- Any one of the criteria
- PSA rise alone
- Do not reach PSA 50% decline from baseline within 3 months
- Symptomatic progression alone

Question 45: In there a role for AR pathway inhibitor to AR pathway inhibitor (back to back) sequencing from nmCRPC to mCRPC, assuming no regulatory or access limitations?

| Opt | Votes |
|-----|-------|
| ■   | 4     |
| ■   | 25    |

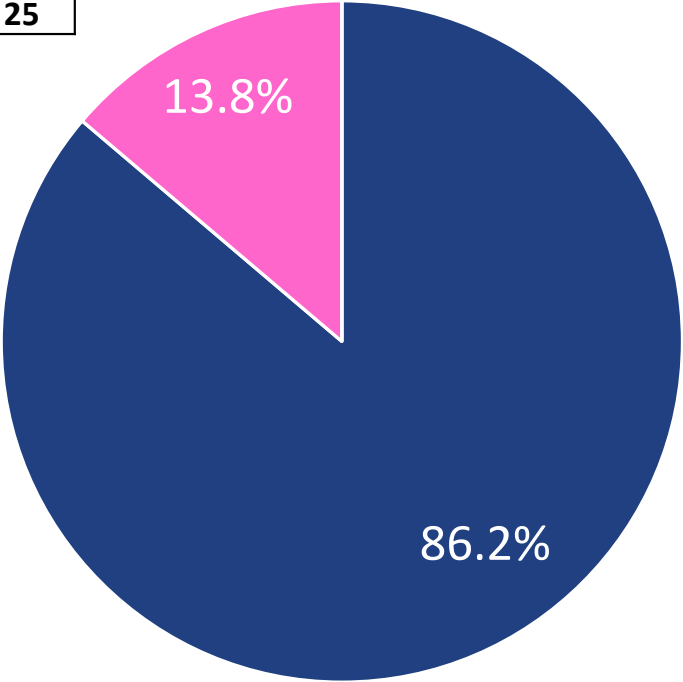

- Yes, in a minority of patients (i.e. who are ineligible, refuse other options, etc.)
- No
- Yes, in the mjority of patients

Question 46: What is your preferred AR pathway inhibitor to AR pathway inhibitor sequencing strategy for patients who progress from nmCRPC to mCRPC?

| Opt | Votes |
|-----|-------|
| ■   | 2     |
| ■   | 27    |

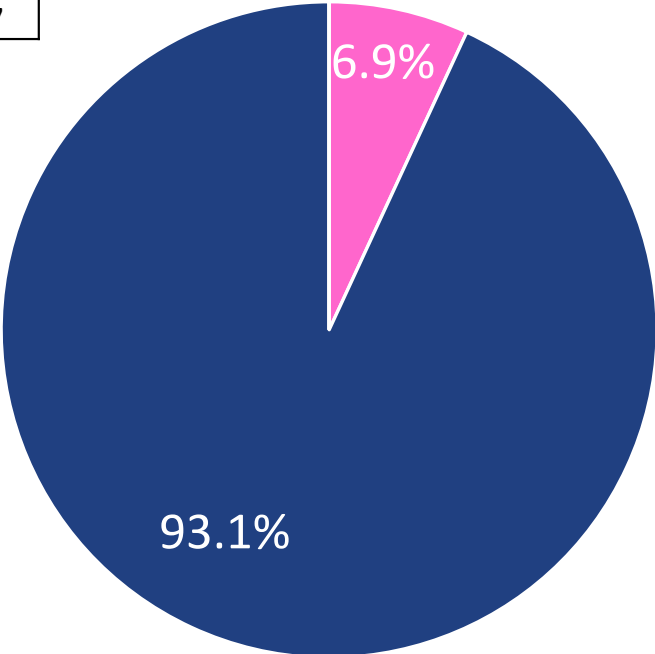

- Apalutamide to Abiraterone
- I do not recommend AR pathway inhibitor to AR pathway inhibitor sequencing
- Darolutamide to Abiraterone
- Darolutamide to Enzalutamide

Question 47: Do you recommend switching treatment in patients with mCRPC at PSA progression alone (in the absence of other signs of progression)?

| Opt | Votes |
|-----|-------|
| ■   | 23    |
| ■   | 6     |

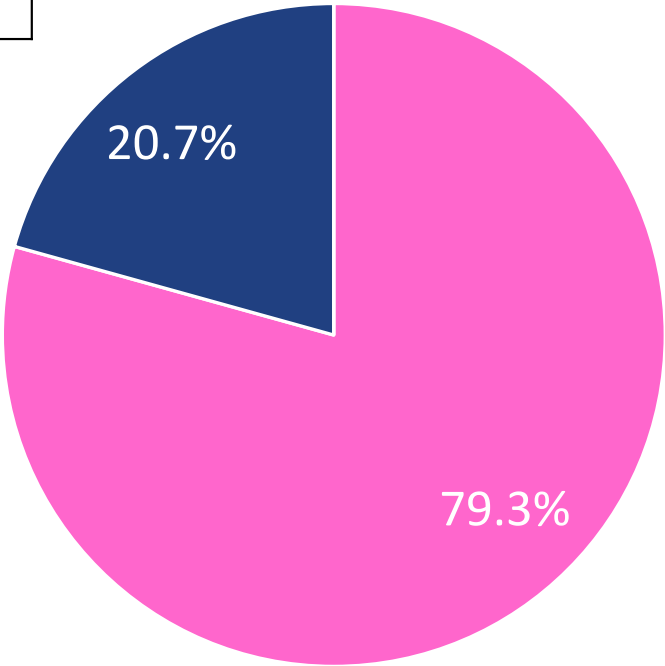

- No
- Yes, in selected patients
- Yes, in the majority of patients

Question 48: Do you recommend switching treatment in patients with mCRPC in the case of unequivocal progression on next-generation imaging (wb-MRI, PET/CT with different tracers) alone (without PSA or clinical progression)?

| Opt | Votes |
|-----|-------|
| ■   | 18    |
| ■   | 2     |
| ■   | 8     |

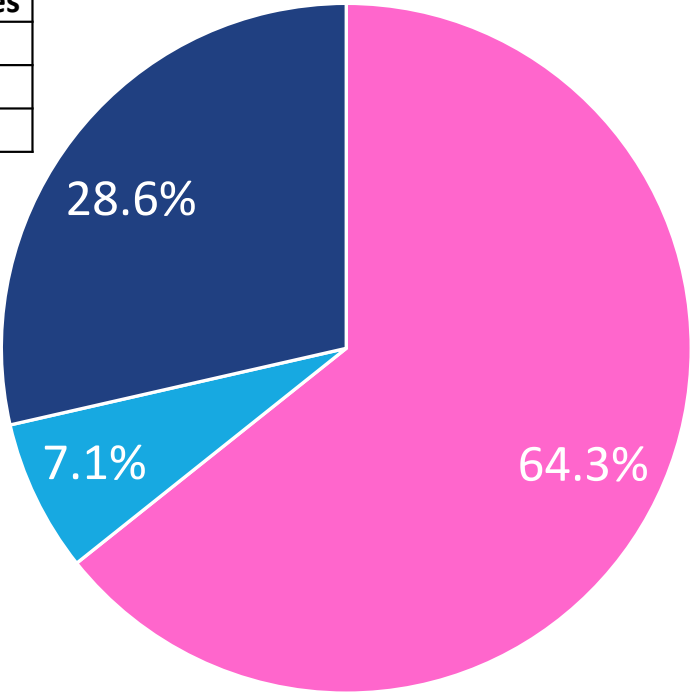

- No
- Yes, in the majority of patients
- Yes, in a minority of patients

Question 49: Is there a role for AR pathway inhibitor to AR pathway inhibitor (back to back) sequencing within the mCRPC setting, assuming no regulatory or access limitations?

| Opt                                                                                    | Votes |
|----------------------------------------------------------------------------------------|-------|
| ■ No                                                                                   | 2     |
| ■ Yes, in a minority of patients (i.e. who are ineligible, refuse other options, etc.) | 27    |

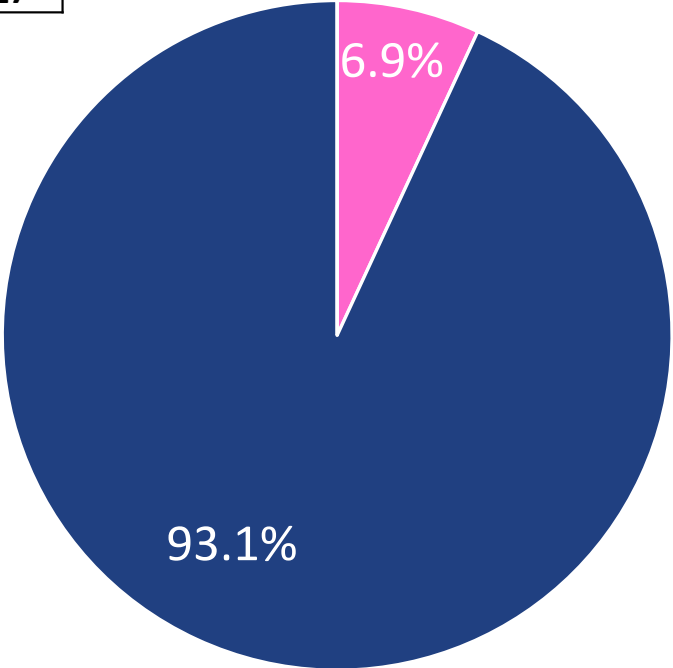

- No
- Yes, in a minority of patients (i.e. who are ineligible, refuse other options, etc.)
- Yes, in the majority of patients



Question 50: What is your preferred AR pathway inhibitor to AR pathway inhibitor sequence in the mCRPC setting?

| Opt | Votes |
|-----|-------|
|     | 11    |
|     | 18    |

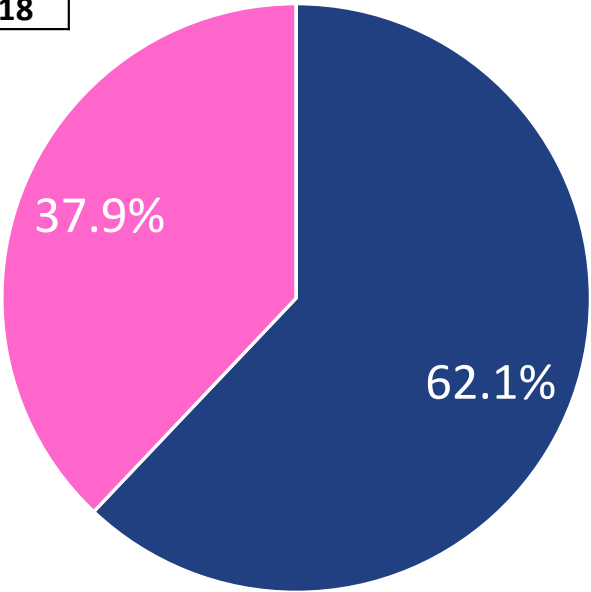

- Abiraterone to Enzalutamide
- I do not recommend AR pathway inhibitor to AR pathway inhibitor sequencing for any patients
- Enzalutamide to Abiraterone

Question 51: Is there a role for biomarker testing as an approach to select candidates who may potentially respond to a second AR pathway inhibitor at some point later in the treatment continuum?

| Opt | Votes |
|-----|-------|
| ■   | 1     |
| ■   | 14    |
| ■   | 14    |

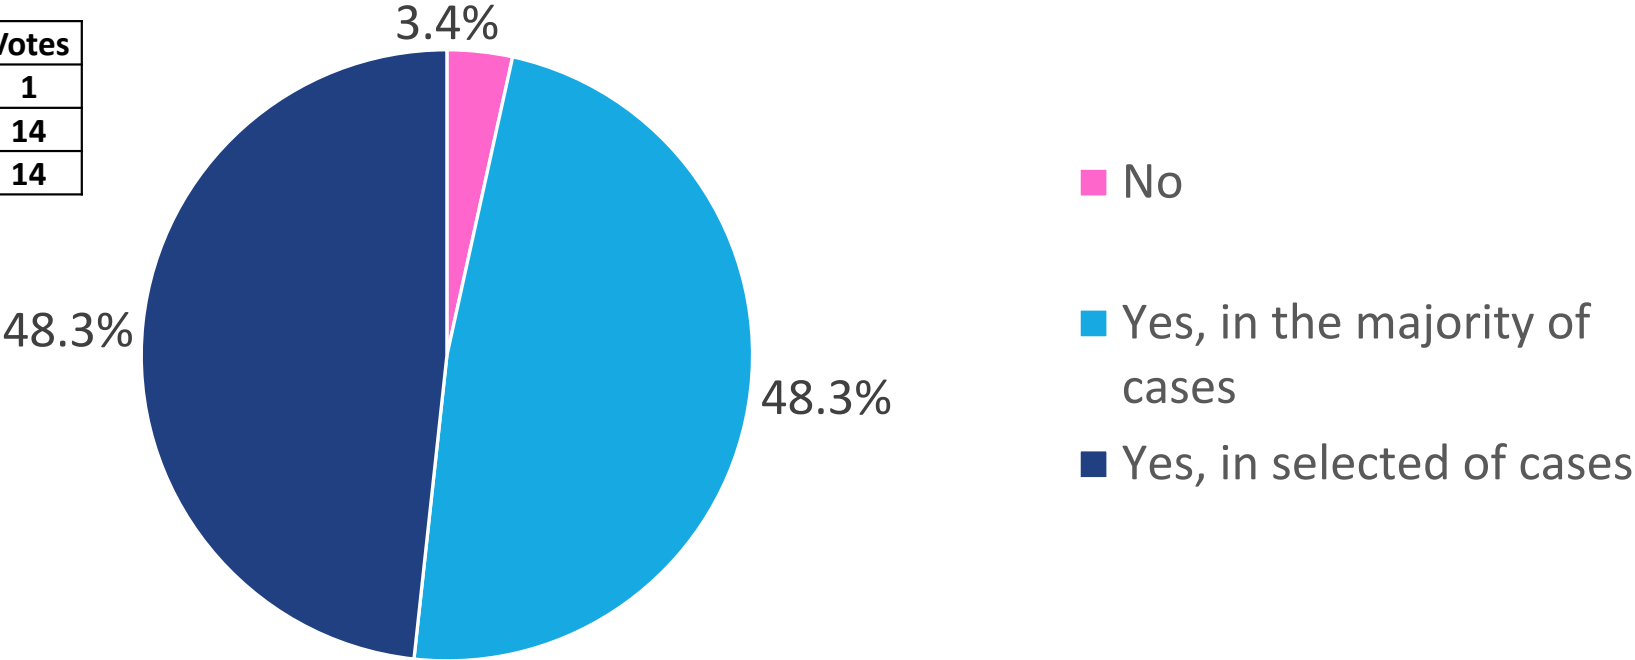

Question 52: For patients starting on long-term ADT plus abiraterone/prednisone with mCSPC who have NO documented osteoporosis, do you routinely recommend initiating denosumab or a bisphosphonate at the dose and schedule used for osteoporosis, in order to prevent cancer treatment-induced bone loss (CTIBL)/fractures?

| Opt | Votes |
|-----|-------|
| ■   | 3     |
| ■   | 1     |
| ■   | 25    |

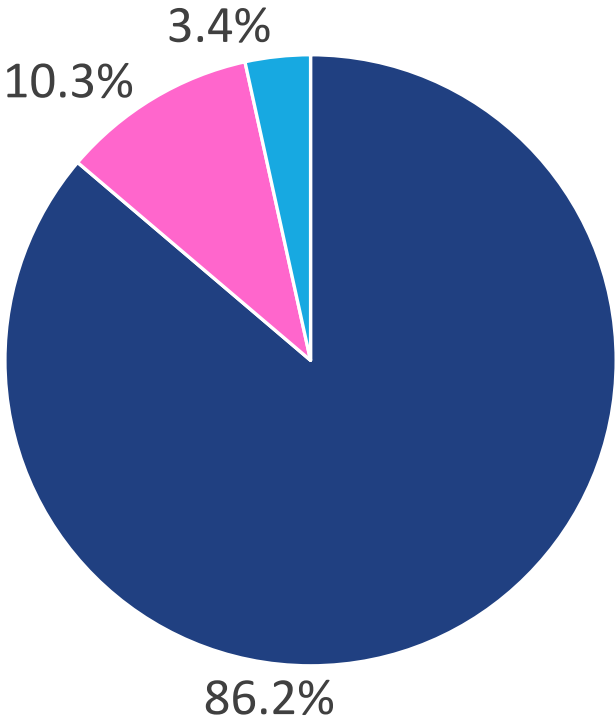

- Only in patients with an increased risk of fractures (e.g. 10-year FRAX risk of =3% for hip fractures and/or =20% for all major fractures)
- No
- Yes, in the majority of patients

Question 53: For patients with nmCRPC starting receiving ADT plus AR pathway inhibitors, who have NO documented osteoporosis, do you routinely recommend initiating denosumab or a bisphosphonate at the dose and schedule used for osteoporosis, in order to prevent cancer treatment-induced bone loss (CTIBL)/fractures?

| Opt | Votes |
|-----|-------|
| ■   | 4     |
| ■   | 25    |

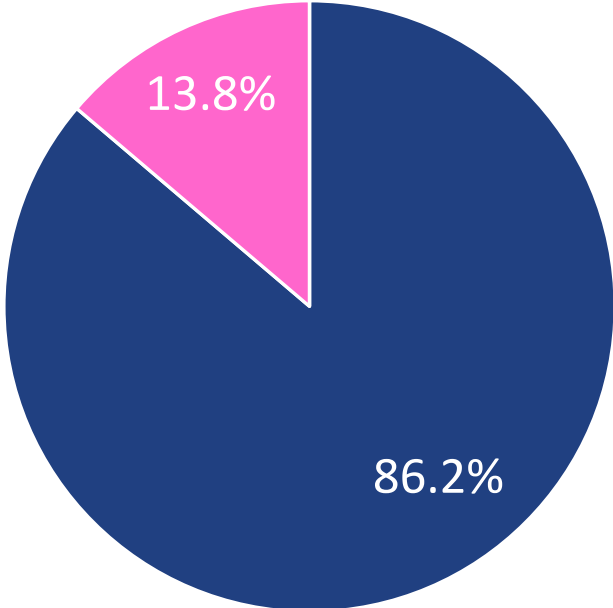

- Only in patients with an increased risk of fractures (e.g. 10-year FRAX risk of =3% for hip fractures and/or =20% for all major fractures)
- No
- Yes, in the majority of patients

Question 54: When do you first recommend tumour genomic testing?

| Opt | Votes |
|-----|-------|
| ■   | 17    |
| ■   | 10    |
| ■   | 1     |
| ■   | 1     |

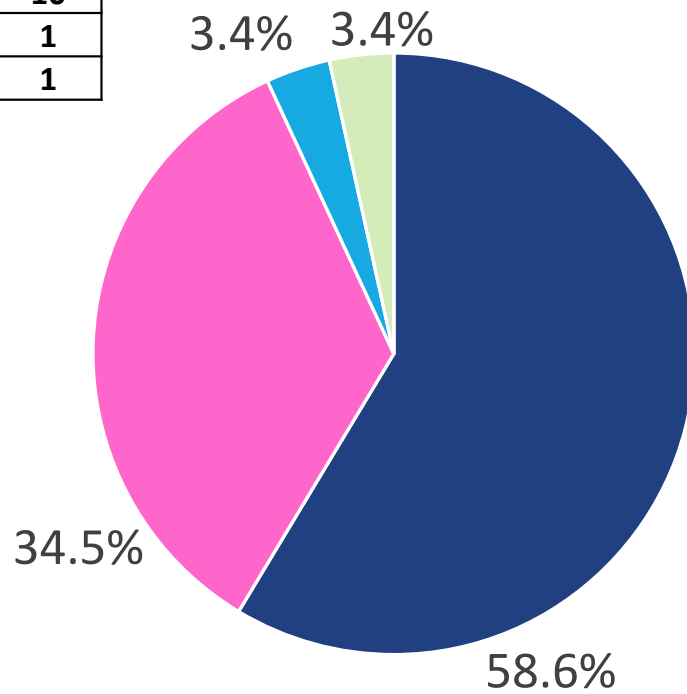

- At first diagnosis of metastatic disease
- After at least one line of chemotherapy and at least one AR pathway inhibitor
- At diagnosis of high-risk localized disease
- I do not routinely recommend tumour genomic testing
- After all standard treatment options are exhausted

Question 55: If you recommend tumour genomic testing, which tests do you consider relevant in patients with metastatic prostate cancer outside of a clinical trial?

| Opt | Votes |
|-----|-------|
| ■   | 8     |
| ■   | 21    |

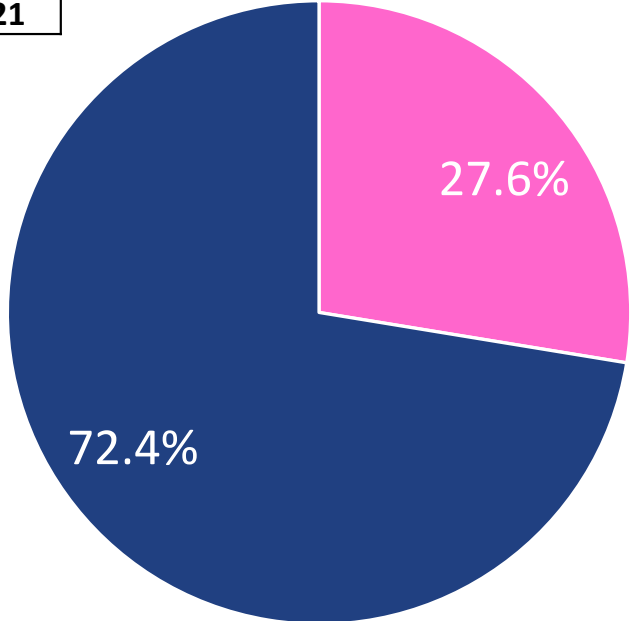

- DNA repair defects, including mismatch repair evaluation (MSI high)
- Prostate cancer-specific larger panel testing, including for example homologous recombination deficiency (BRCA1, BRCA2, PALB2, RAD51), PTEN, PI3K, SPOP, CDK12, ATM, mismatch repair evaluation (MSI high), tumour mutation burden

Question 55a: Do you have access to genomic testing outside of clinical trials?

| Opt | Votes |
|-----|-------|
| Yes | 3     |
| No  | 26    |

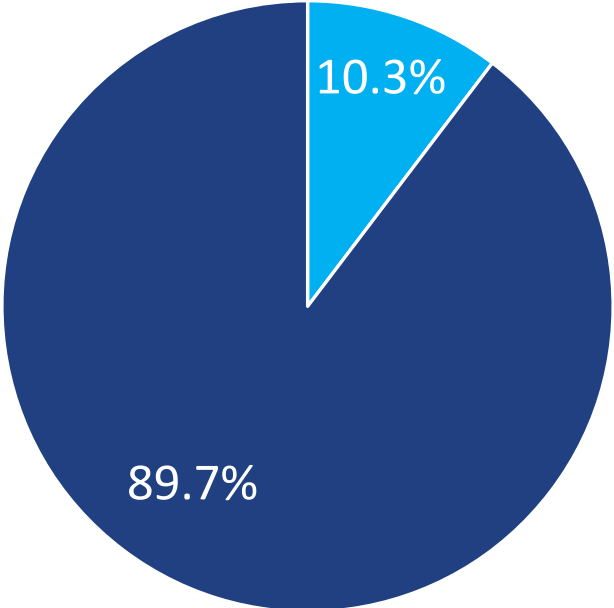

■ Yes  
■ No

Question 56: Does the presence of a tumour BRCA1/2 germline aberration in patients with low-risk localized prostate cancer influence your treatment decision?

| Opt | Votes |
|-----|-------|
| ■   | 5     |
| ■   | 24    |

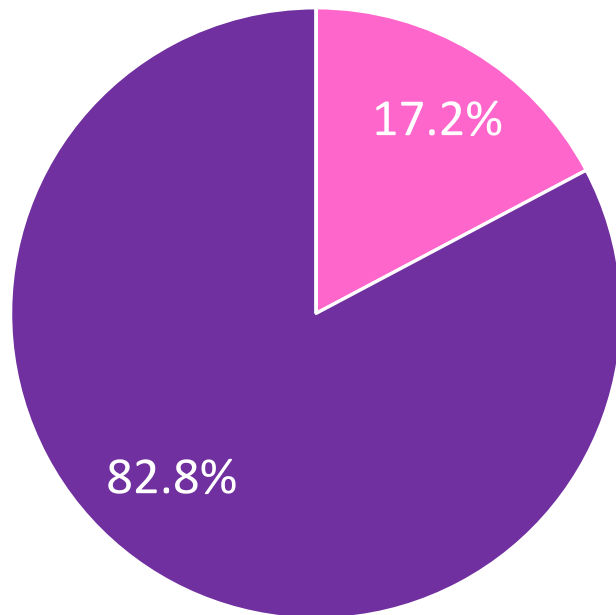

- No, patients continue with active surveillance but more intense monitoring
- Yes, I recommend radical therapy (either surgery or radiation) instead of surveillance
- Yes, I recommend radical prostatectomy over radiation therapy
- Yes, I recommend radiation therapy over radical prostatectomy



Question 57: Does the presence of a tumour BRCA1/2 germline aberration in patients with intermediate or high-risk localized prostate cancer influence your treatment decision?

| Opt | Votes |
|-----|-------|
|     | 2     |
|     | 11    |
|     | 12    |

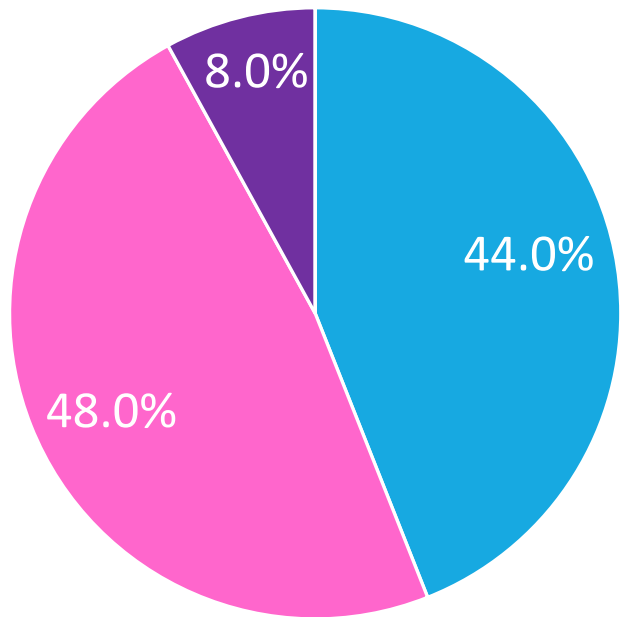

- Yes, I recommend radical prostatectomy over radiation therapy
- No, I make the standard treatment recommendation but more intense monitoring
- No, I make the standard treatment recommendation
- Yes, I recommend radiation therapy over radical prostatectomy

Question 58: Do you recommend that the majority of metastatic prostate cancer patients get their tumours tested for BRCA1/2 aberrations?

| Opt                                                    | Votes |
|--------------------------------------------------------|-------|
| Yes                                                    | 24    |
| Yes, but only metastatic castration-resistant patients | 3     |
| No                                                     | 2     |

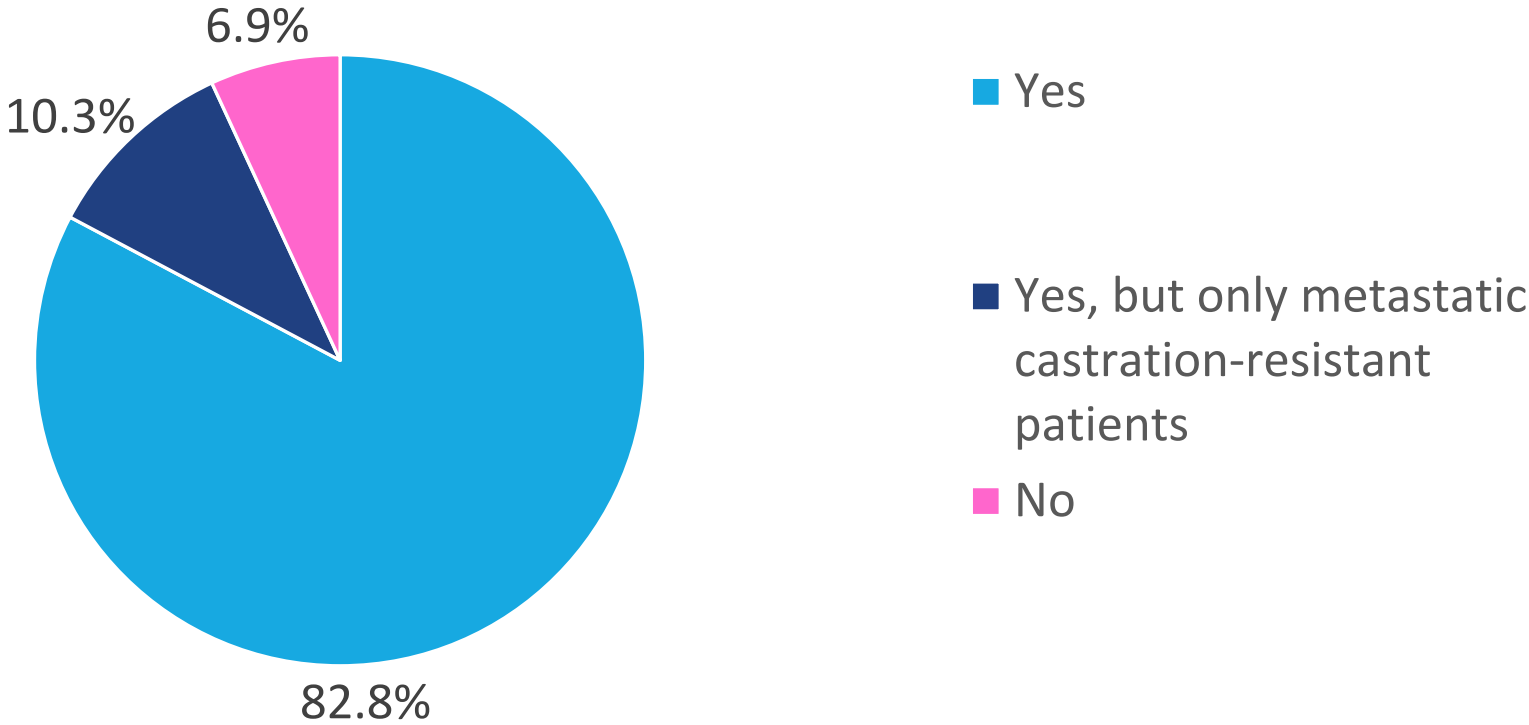

Question 59a: Who and when should patients be tested for BRCA 1/2 mutation? (somatic)

| Opt | Votes |
|-----|-------|
| ■   | 17    |
| ■   | 5     |
| ■   | 4     |
| ■   | 3     |

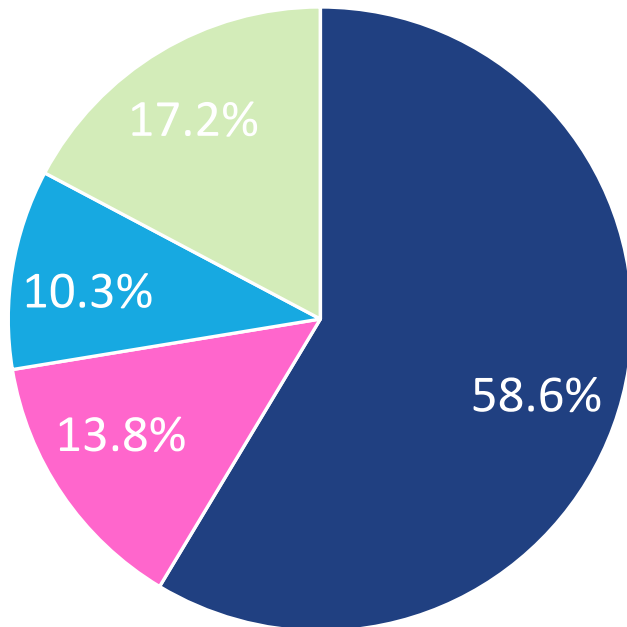

- PCa patients with mCNPC/mCSPC
- Any PCa patients with a strong family history of BRCA-associated concerns and undocumented somatic and germline aberration
- PCa patients with high/very high-risk localized disease
- PCa patients with mCRPC
- I don't think a positive BRCA1/2 test result will change my treatment decision making

Question 59b: Who and when should patients be tested for BRCA 1/2 mutation? (germline)

| Opt | Votes |
|-----|-------|
| ■   | 3     |
| ■   | 3     |
| ■   | 21    |
| ■   | 2     |

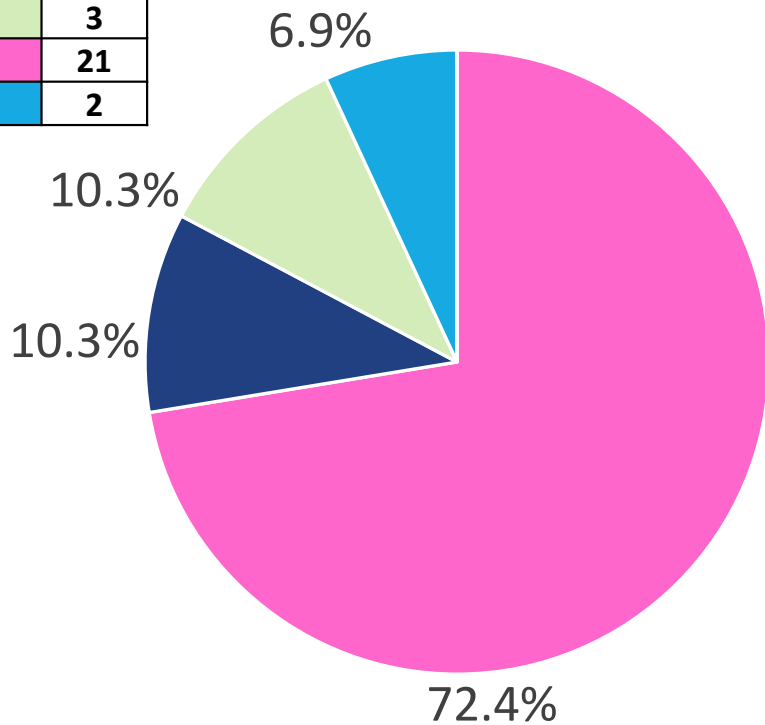

- Any PCa patients with a strong family history of BRCA-associated concerns and undocumented somatic and germline aberration
- PCa patients with mCRPC
- PCa patients with mCNPC/mCSPC
- PCa patients with high/very high-risk localized disease
- I don't think a positive BRCA1/2 test result will change my treatment decision making

Question 60: Do you recommend that the majority of metastatic prostate cancer patients with a deleterious germline BRCA1/2 mutation receive a PARP inhibitor during their disease course outside of a clinical trial if none is available?

| Opt                       | Votes |
|---------------------------|-------|
| Yes                       | 28    |
| Yes, in selected patients | 1     |

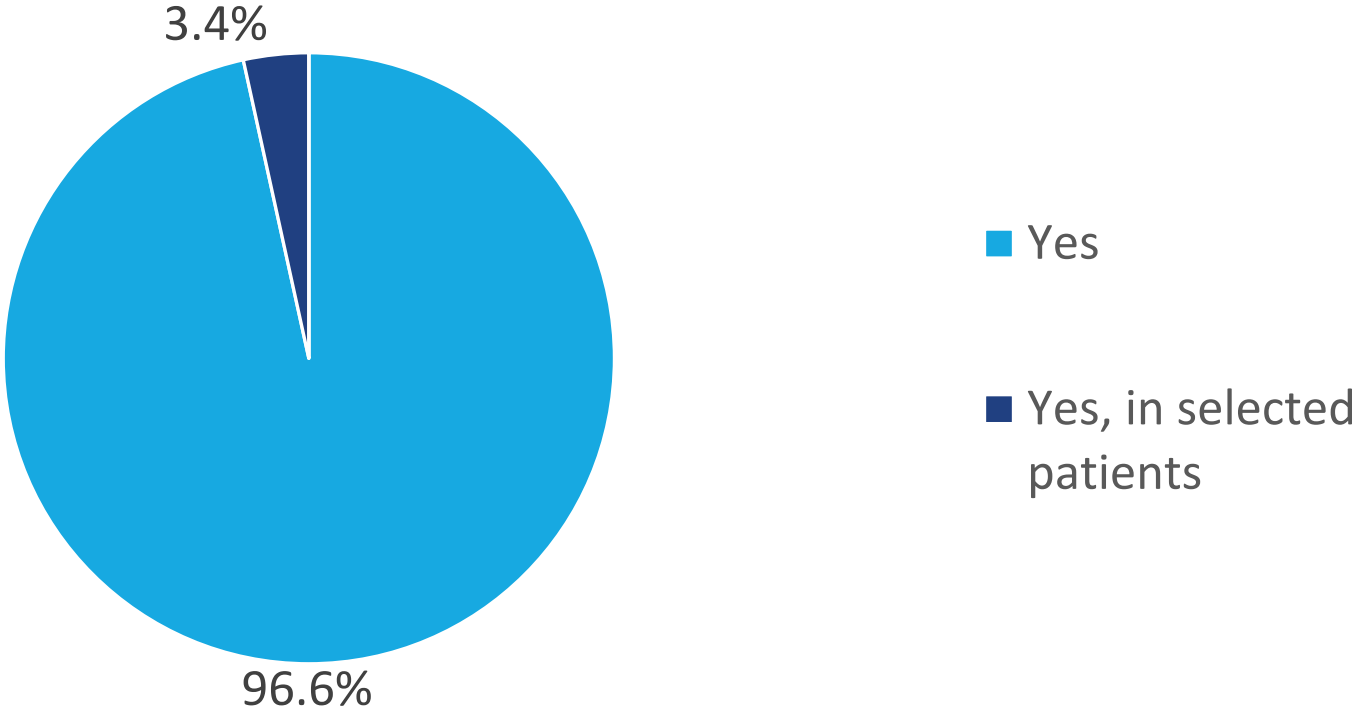

Question 61: Do you recommend that the majority of metastatic prostate cancer patients with a deleterious germline BRCA1/2 mutation receive platinum therapy during their disease course outside of a clinical trial if no trials are available?

| Opt                       | Votes |
|---------------------------|-------|
| Yes                       | 13    |
| Yes, in selected patients | 16    |

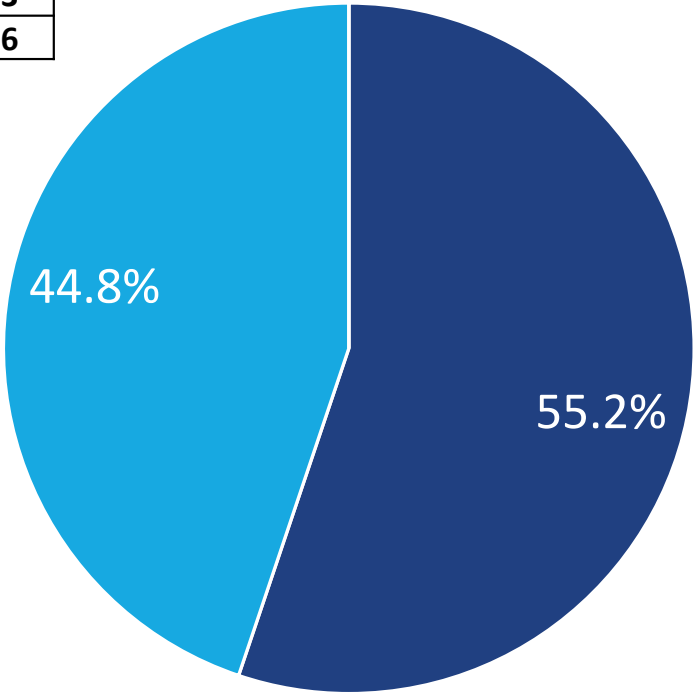

- Yes, in selected patients
- Yes
- No

Question 62: What do you believe is the best way to test for BRCA 1/2 mutations in prostate cancer patients?

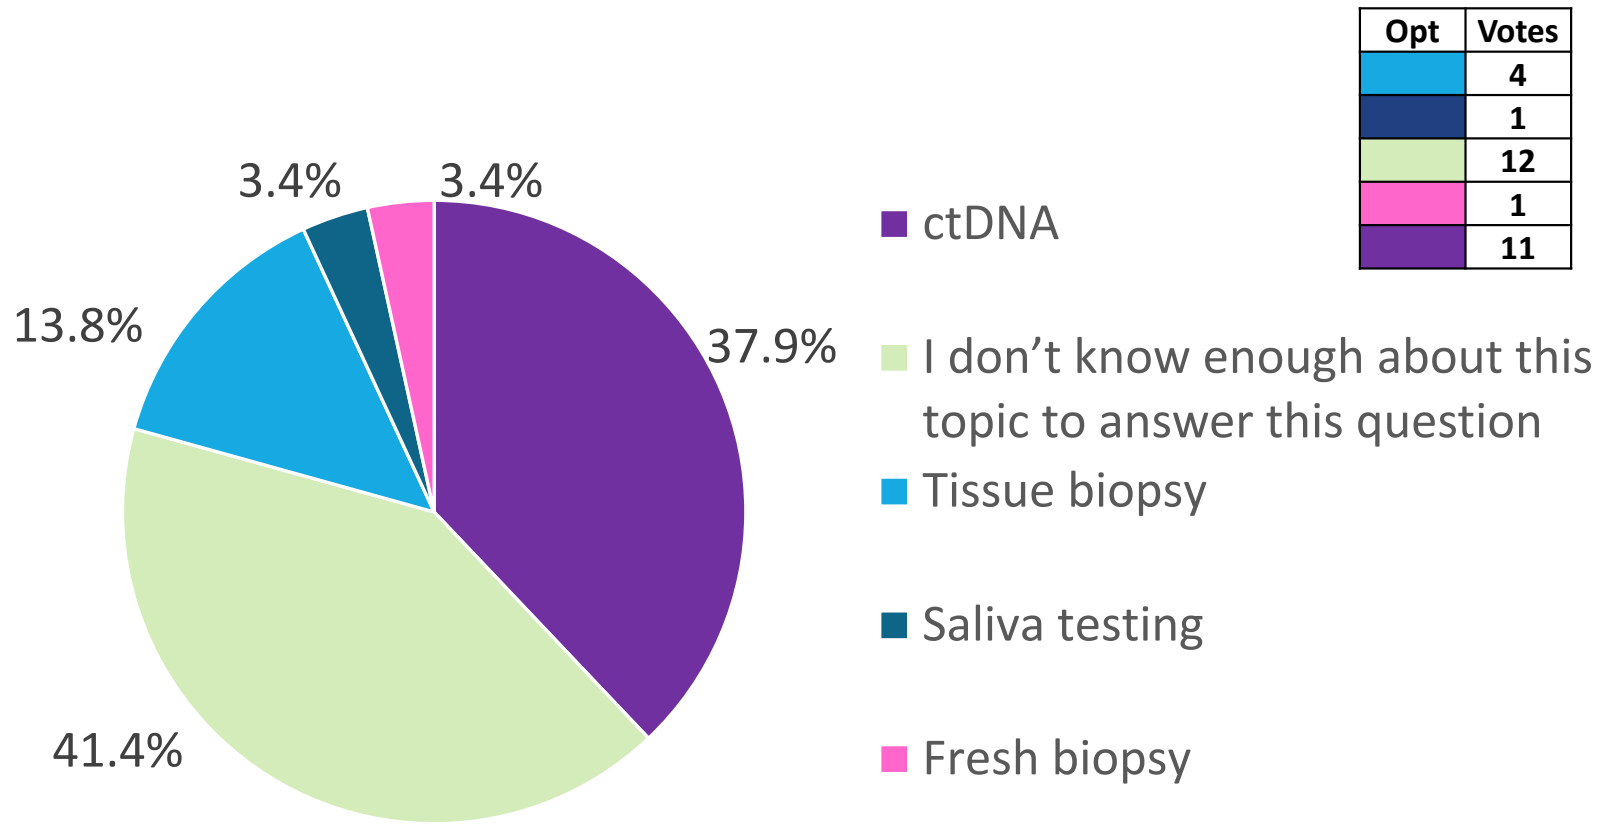

Question 63: Which specialty do you recommend ordering the BRCA 1/2 genetic testing and leading the treatment planning for patients with positive result?

| Opt | Votes |
|-----|-------|
| ■   | 25    |
| ■   | 4     |

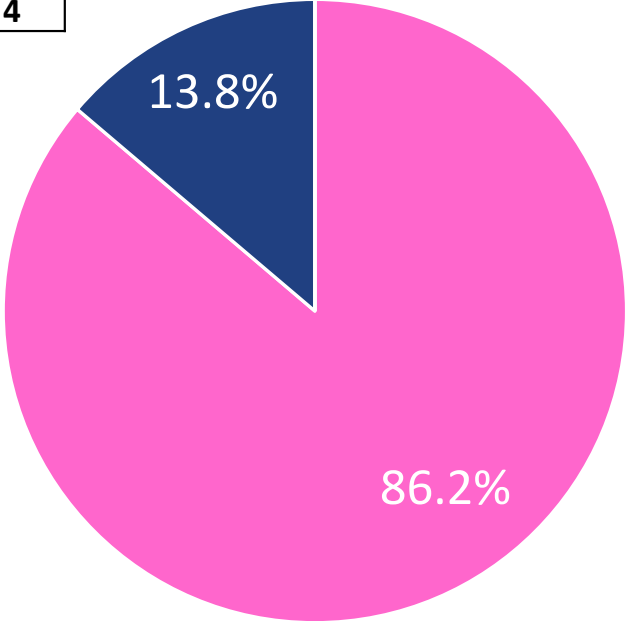

- All specialists with experience in screening and treating should be able to order and plan optimum treatment for patients with a positive result
- Medical oncologist
- Urologist
- Urologist and positive result to be sent to medical oncology for treatment planning



Question 64: What is your treatment recommendation for metastatic prostate cancer with a pathogenic BRCA 1/2 aberration (somatic and/or germline)?

| Opt | Votes |
|-----|-------|
| ■   | 2     |
| ■   | 2     |
| ■   | 25    |

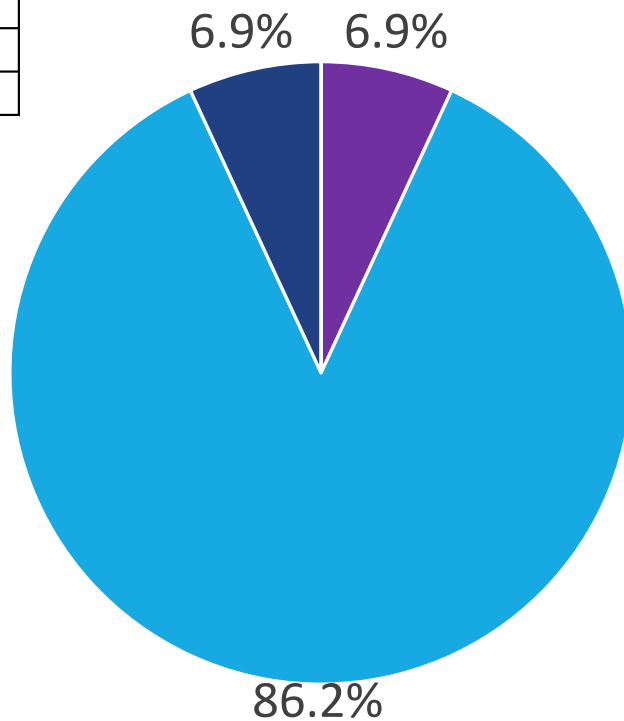

- PARP inhibitor or platinum therapy + AR pathway inhibitor therapy
- PARP inhibitor or platinum therapy during their disease course when available
- PARP inhibitor + AR pathway inhibitor therapy
- I don't believe in the PARPi data for Pca patients yet

Question 65: Do you recommend genetic counselling and/or germline DNA testing for patients with newly diagnosed metastatic (M1) castration-sensitive/naïve prostate cancer (CSPC/CNPC)?

| Opt | Votes |
|-----|-------|
| ■   | 19    |
| ■   | 10    |

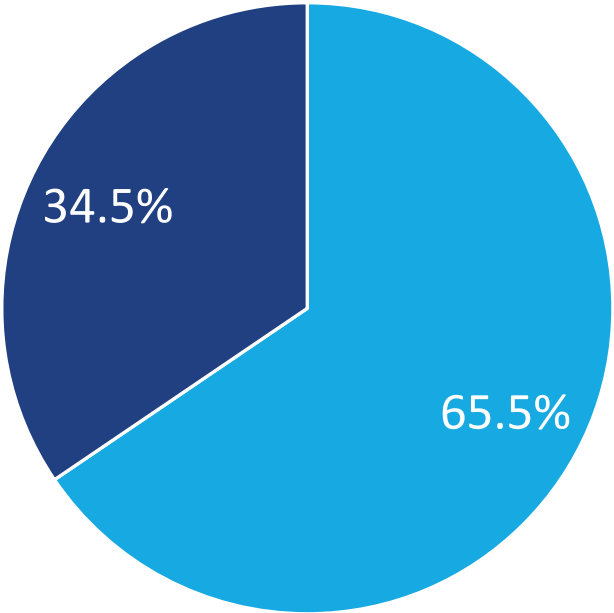

- Yes, in the majority of patients
- Yes, in a minority of patients
- No

S1: For patients with cN1, cM0 prostate cancer who are receiving radiation therapy as radical loco-regional treatment, do you recommend approximately 24 months duration of ADT for the majority of your patients?

| Opt                                   | Votes |
|---------------------------------------|-------|
| Yes                                   | 13    |
| Abstain, I don't treat these patients | 16    |

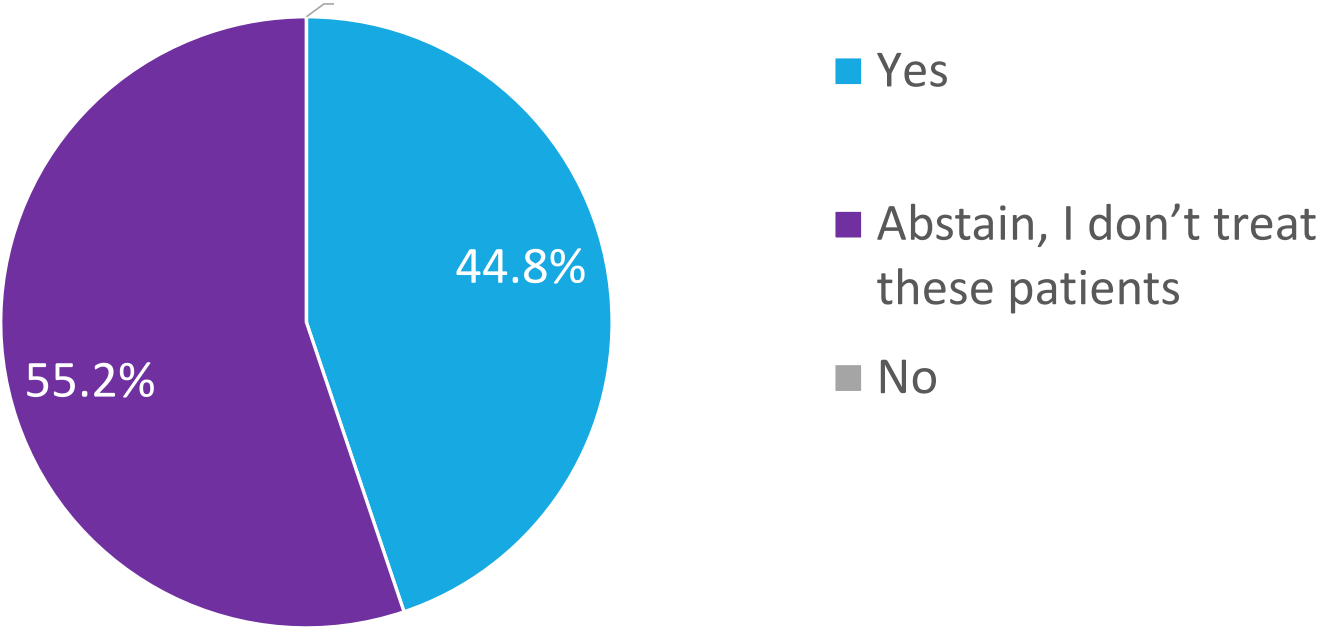

S2: For patients with pN1 disease receiving adjuvant radiation therapy, do you recommend approximately 24 months duration of ADT for the majority of your patients?

| Opt | Votes |
|-----|-------|
| ■   | 2     |
| ■   | 16    |
| ■   | 11    |

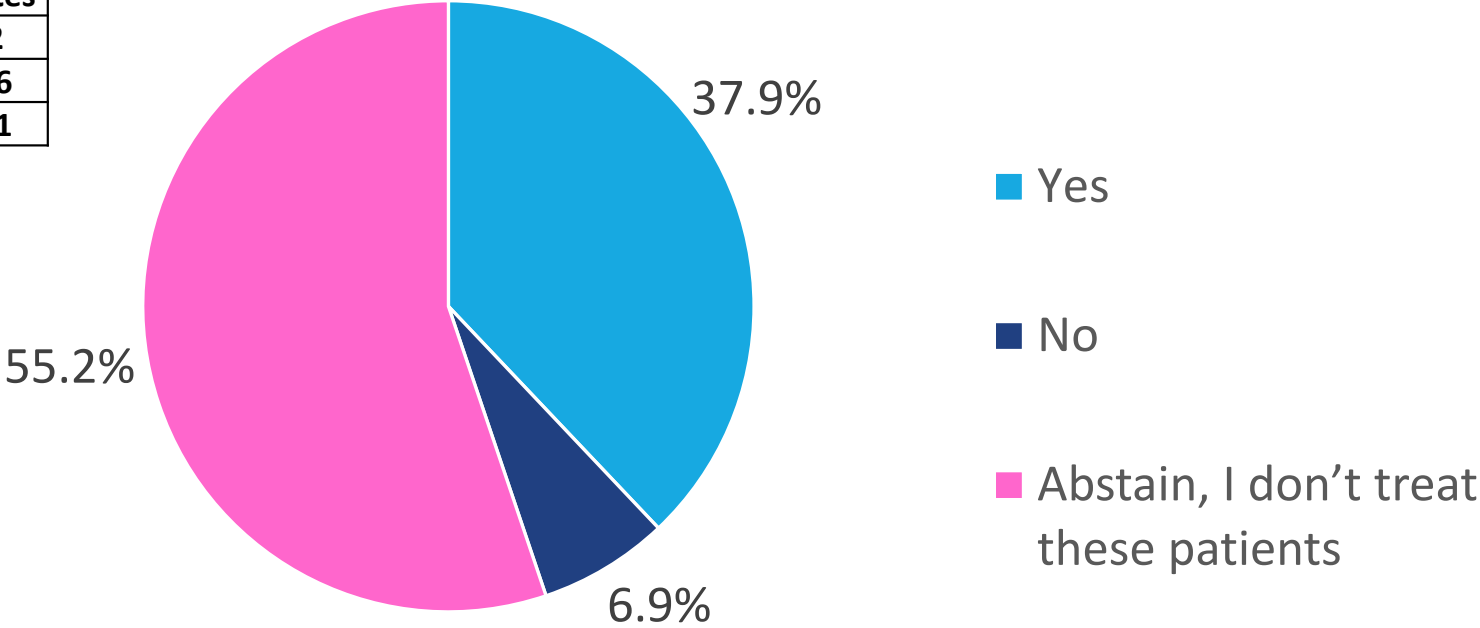

S3: For patients receiving salvage radiation therapy following surgery, do you recommend approximately 12 months duration of ADT for the majority of your patients?

| Opt | Votes |
|-----|-------|
| ■   | 9     |
| ■   | 14    |
| ■   | 6     |

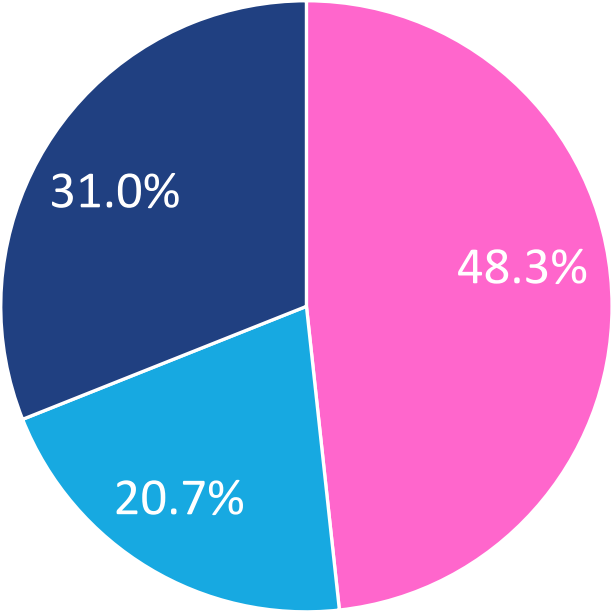

- Abstain, I don't treat these patients
- Yes
- No

S4: For the majority of your patients, at what PSA level would you recommend salvage radiation?

| Opt | Votes |
|-----|-------|
| ■   | 8     |
| ■   | 9     |
| ■   | 11    |
| ■   | 1     |

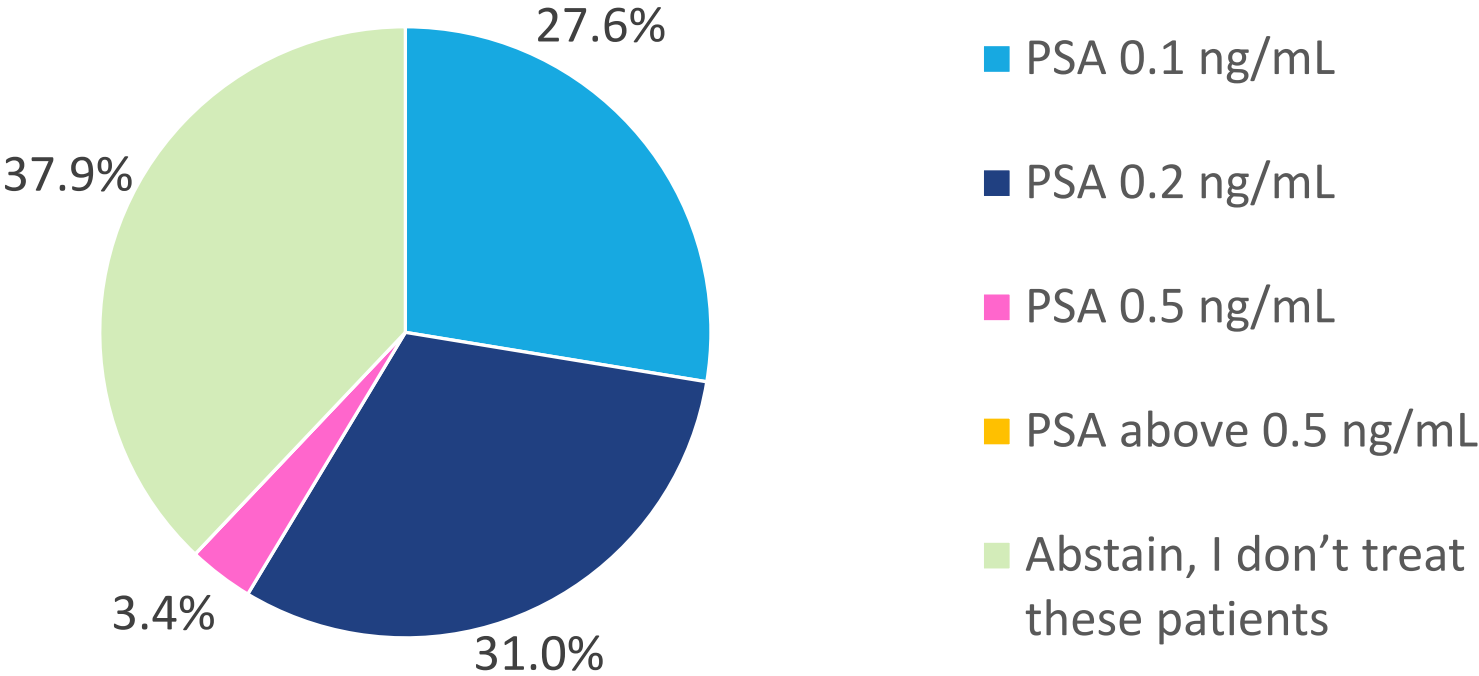

S5: For patients receiving salvage radiation following surgery, do you recommend ADT in the majority of your patients?

| Opt | Votes |
|-----|-------|
| ■   | 5     |
| ■   | 12    |
| ■   | 12    |

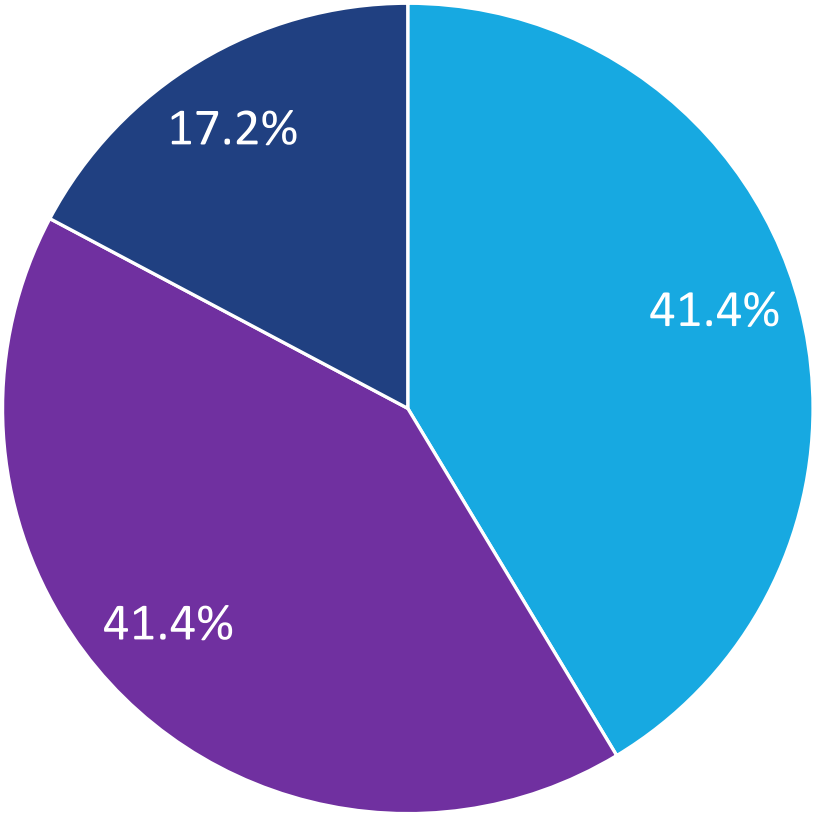

- Abstain, I don't treat these patients
- Yes
- No

S6: For patients with undetectable postoperative PSA who have recovered urinary continence, do you recommend adjuvant radiation therapy (whole pelvis and prostate bed) in cases of: pN1 disease of  $\leq 2$  lymph nodes?

| Opt | Votes |
|-----|-------|
| ■   | 6     |
| ■   | 4     |
| ■   | 11    |
| ■   | 8     |

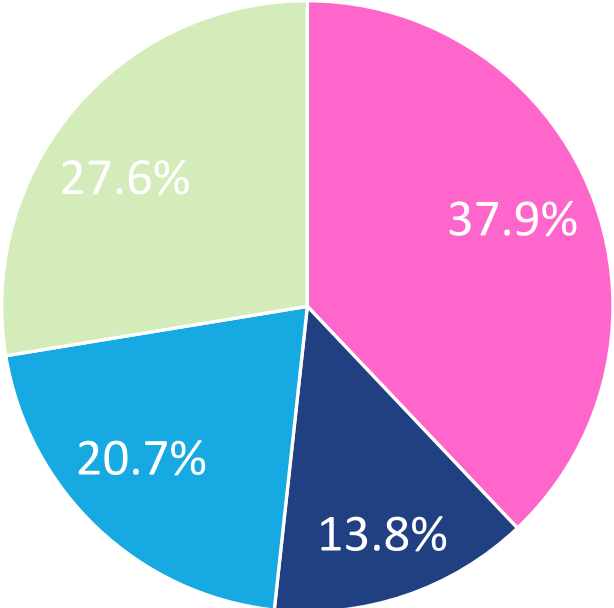

- Abstain, I don't treat these patients
- Yes, in a minority of patients
- Yes, in the majority of patients
- No



# Supplemental Online Questionnaire

A1. Please indicate your area of specialty

| Opt | Votes |
|-----|-------|
| ■   | 2     |
| ■   | 11    |
| ■   | 11    |
| ■   | 5     |

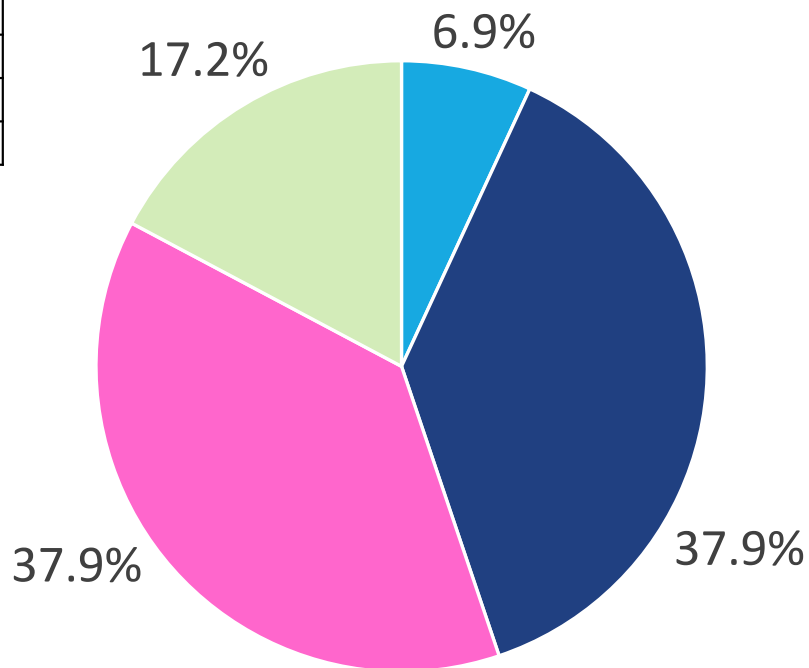

- Urologist
- Uro-Oncologist
- Medical Oncologist
- Radiation Oncologist

A2. Please indicate your region of practice

| Opt | Votes |
|-----|-------|
| ■   | 6     |
| ■   | 15    |
| ■   | 7     |

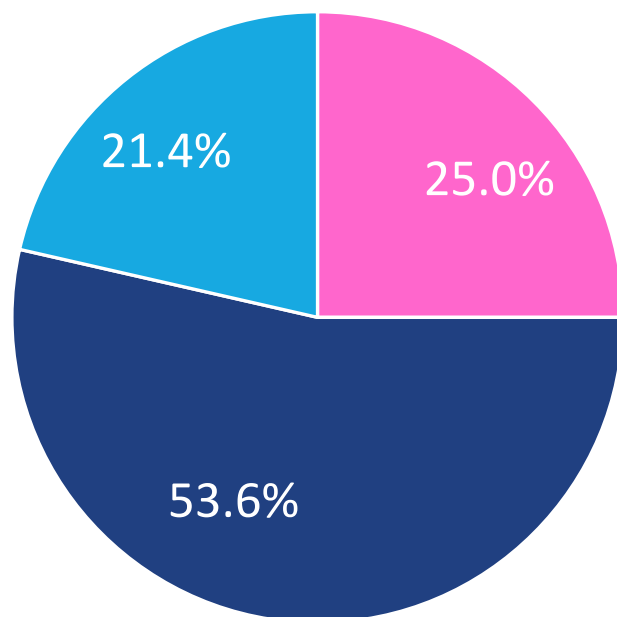

■ Western Canada (BC, AB)

■ Ontario

■ Quebec and Atlantic  
Canada

A3. Please indicate the number of years you have been in practice

| Opt | Votes |
|-----|-------|
| ■   | 13    |
| ■   | 15    |

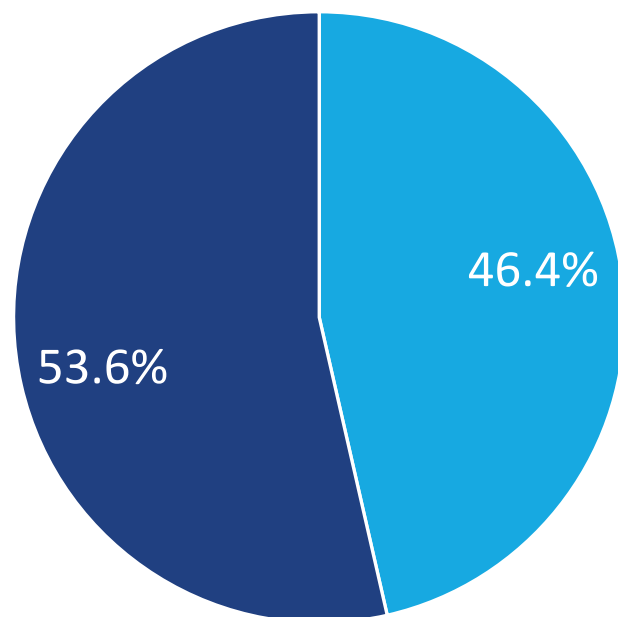

- Less than 10 years
- 10 years or greater

B1. Please indicate the extent to which you currently use PSMA-PET in the following patient clinical states

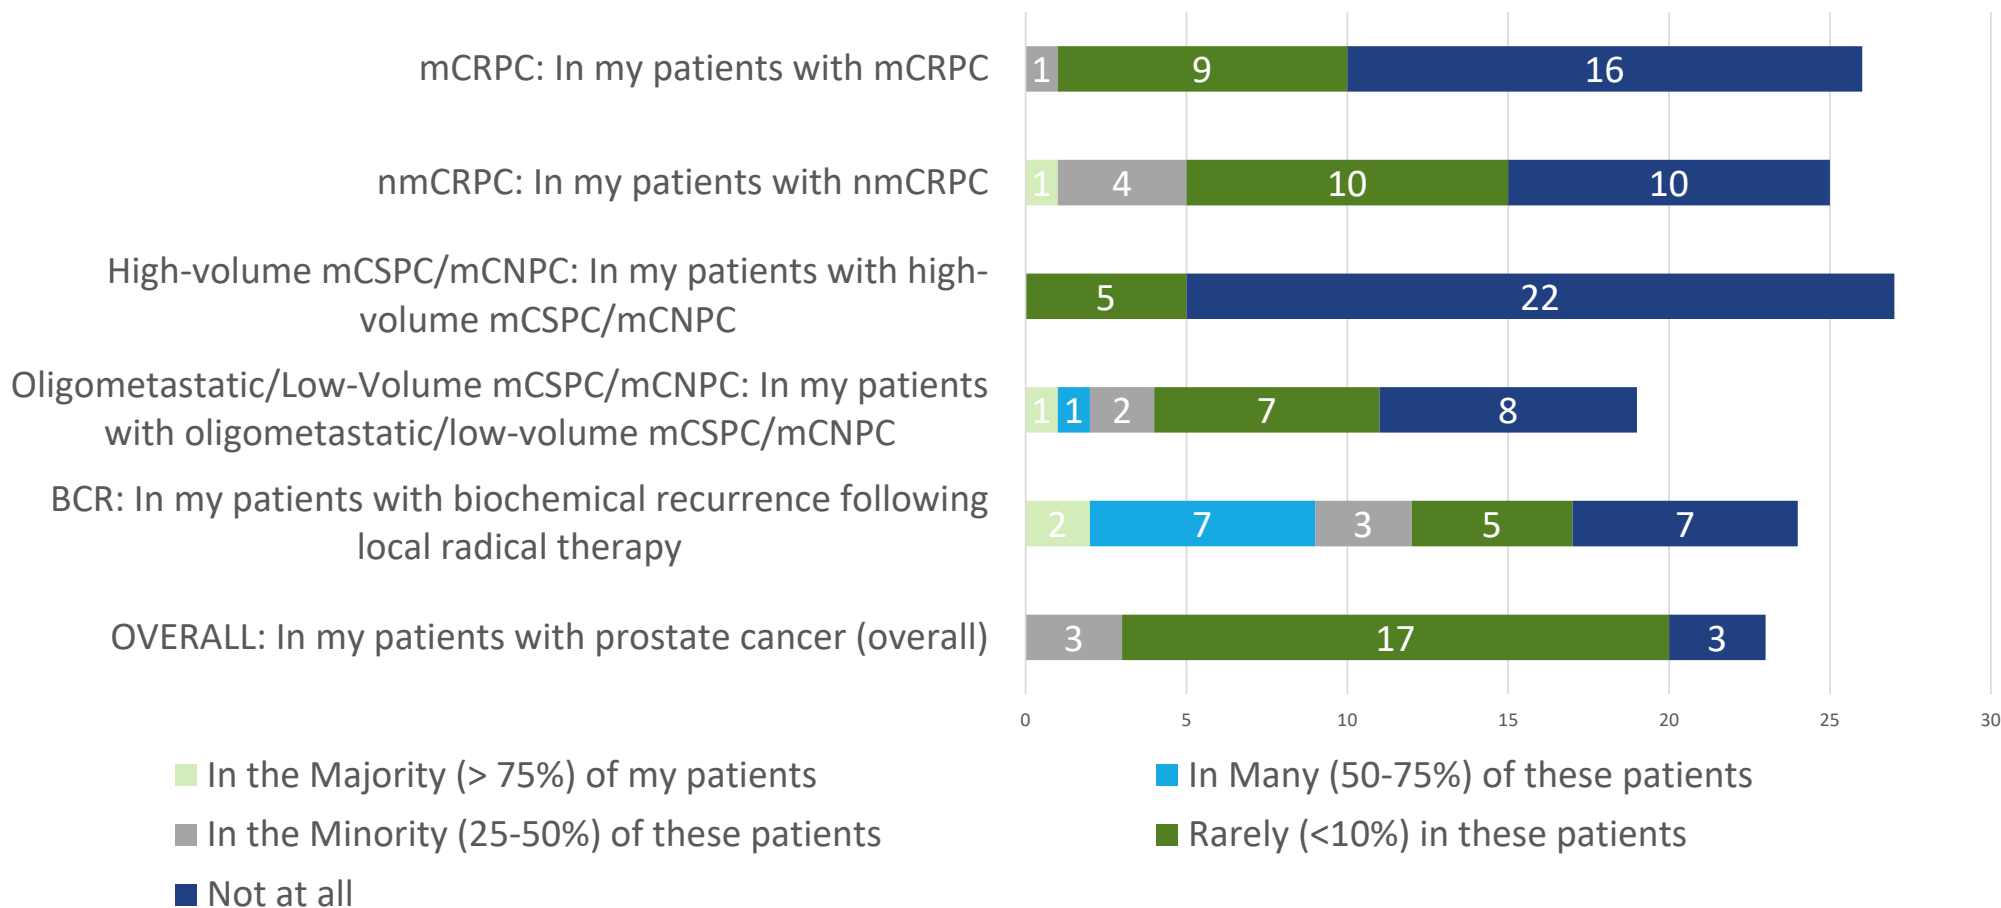

1. What is your preferred treatment recommendation for the majority of patients with newly diagnosed cN1 (pelvic lymph nodes), M0 prostate cancer?

| Opt | Votes |
|-----|-------|
| ■   | 3     |
| ■   | 23    |
| ■   | 2     |

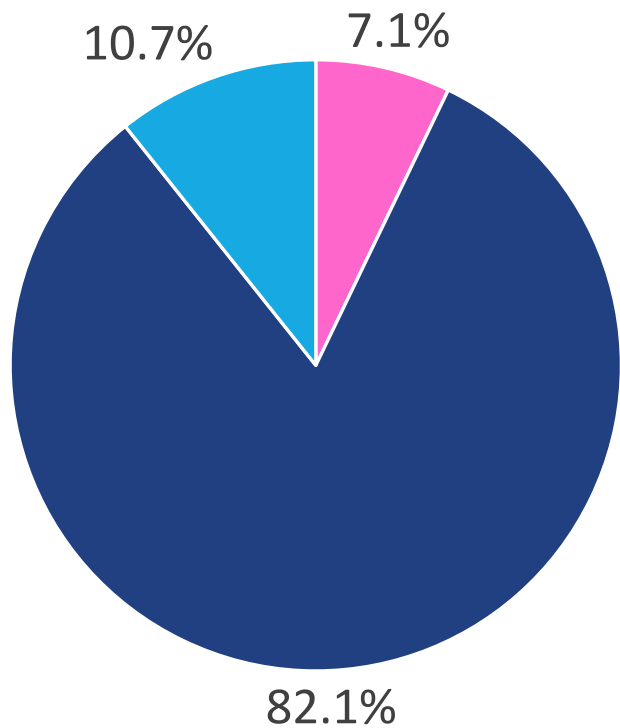

- Systemic therapy alone without loco-regional therapy
- Radical loco-regional treatment with systemic therapy
- Radical loco-regional alone without systemic therapy

2. What is your preferred primary loco-regional treatment in cN1 (pelvic lymph nodes), M0 prostate cancer?

| Opt | Votes |
|-----|-------|
|     | 21    |
|     | 7     |

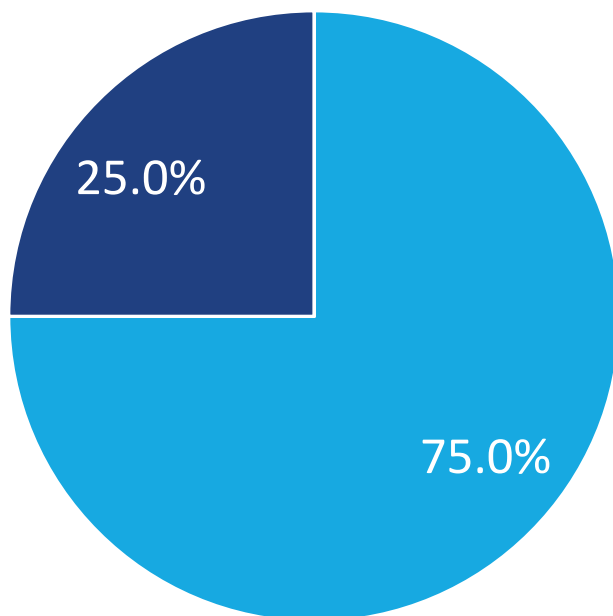

- Radiation therapy
- Surgery
- Either radiation therapy or surgery
- I don't recommend radical loco-regional treatment

3. For patients with M0 prostate cancer with cN1 disease who are receiving radical loco-regional radiation therapy, which systemic therapy do you most often recommend?

| Opt | Votes |
|-----|-------|
|     | 18    |
|     | 7     |
|     | 3     |

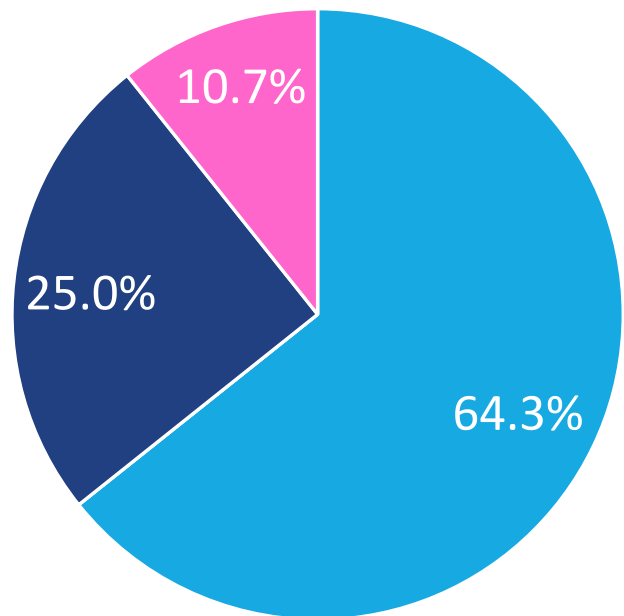

- ADT alone
- ADT plus docetaxel
- ADT plus abiraterone
- ADT plus apalutamide or enzalutamide
- I do not recommend systemic treatment



4. For patients with cN1, cM0 prostate cancer who are receiving radiation therapy as radical loco-regional treatment, which duration of ADT do you most often recommend?

| Opt | Votes |
|-----|-------|
| 1   | 1     |
| 6   | 6     |
| 19  | 19    |
| 2   | 2     |

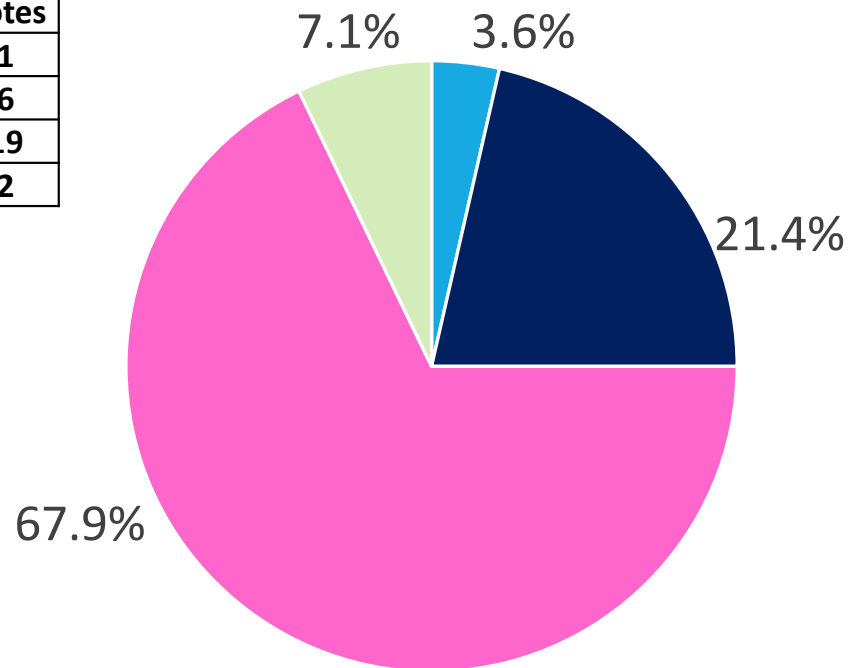

■ ADT short-term (6-12 months)

■ ADT mid-term (12-24 months)

■ ADT long term (24-36 months)

■ ADT lifelong

■ I do not recommend ADT treatment

5. For patients with undetectable postoperative PSA who have recovered urinary continence, do you recommend adjuvant radiation therapy (whole pelvis and prostate bed) in cases of: pN1 disease of  $\leq 2$  lymph nodes?

| Opt                              | Votes |
|----------------------------------|-------|
| Yes, in the majority of patients | 3     |
| Yes, in the minority of patients | 14    |
| No                               | 11    |

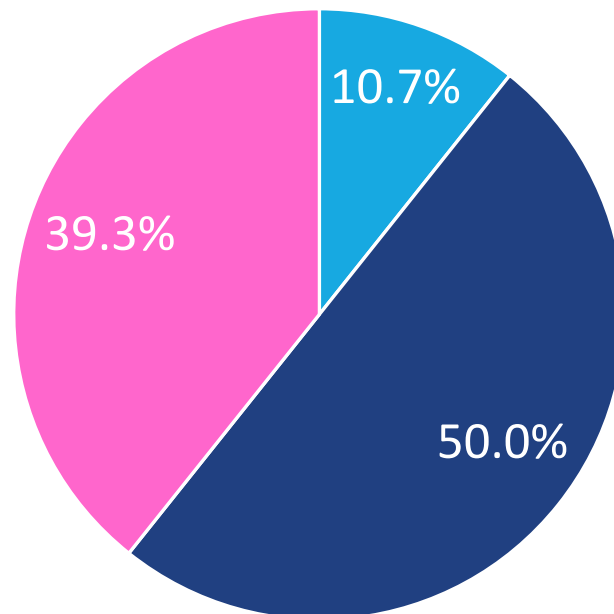

- Yes, in the majority of patients
- Yes, in the minority of patients
- No

6. For patients with undetectable postoperative PSA who have recovered urinary continence, do you recommend adjuvant radiation therapy (whole pelvis and prostate bed) in cases of: pN1 disease of 3 or more lymph nodes?

| Opt | Votes |
|-----|-------|
| ■   | 6     |
| ■   | 9     |
| ■   | 13    |

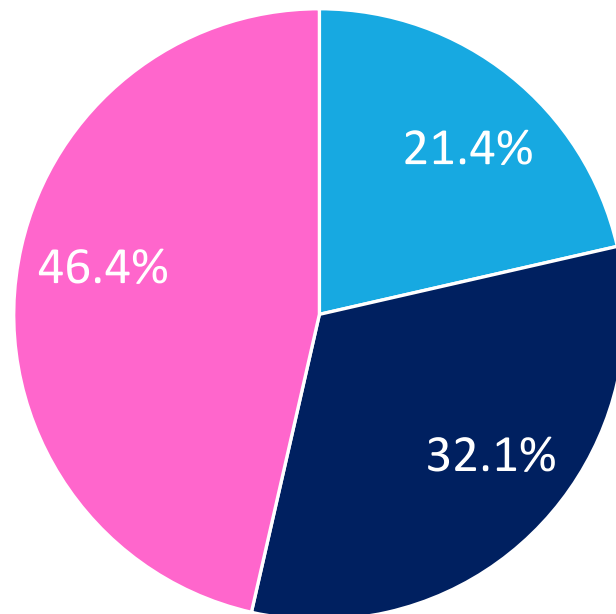

- Yes, in the majority of patients
- Yes, in the minority of patients
- No

7. Which systemic therapy do you most often recommend with adjuvant radiation therapy in patients with pN1 disease?

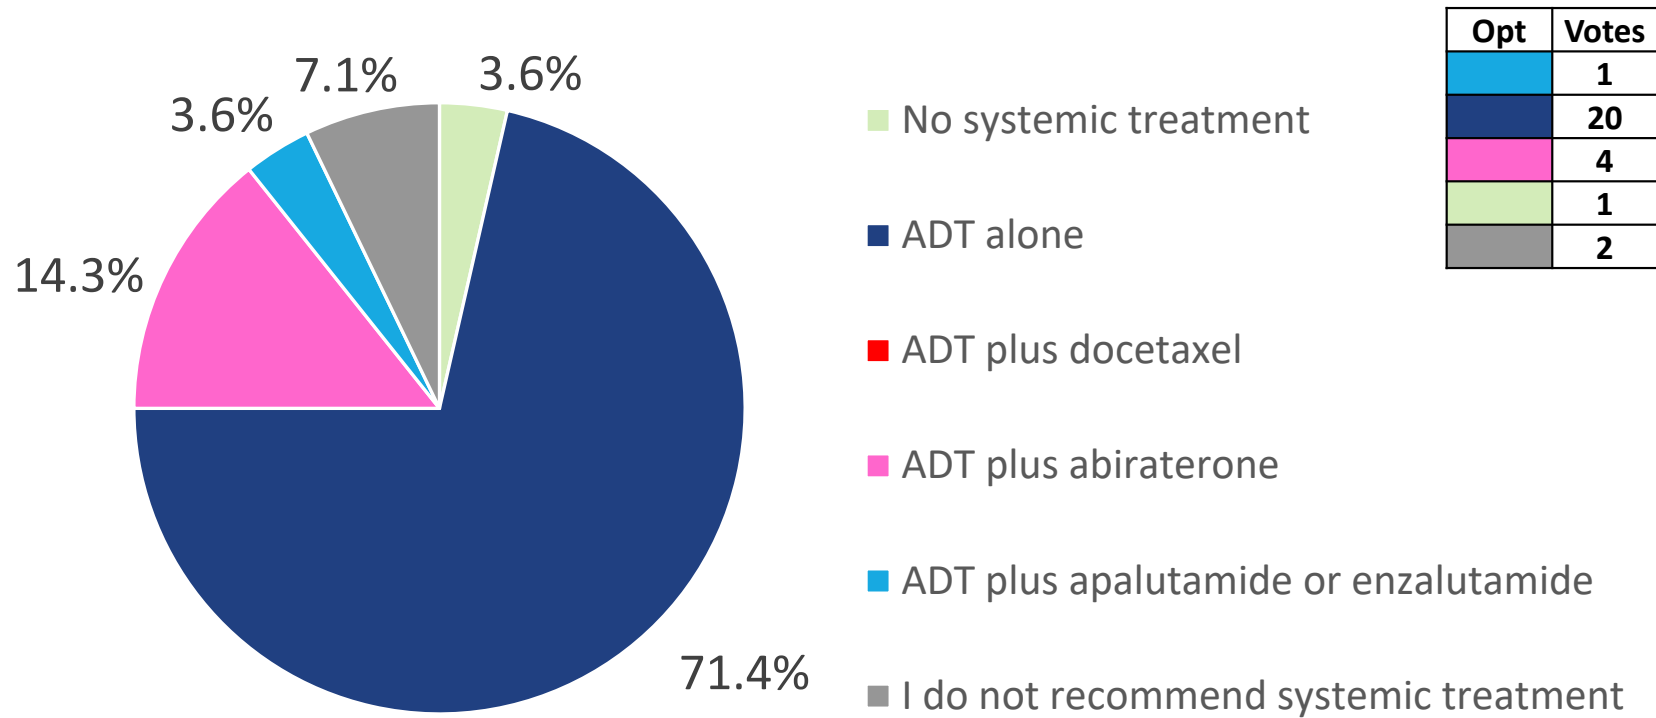

8. Which duration of ADT do you most often recommend with adjuvant radiation therapy in the majority of patients with pN1 disease?

| Opt | Votes |
|-----|-------|
| ■   | 2     |
| ■   | 12    |
| ■   | 12    |
| ■   | 2     |

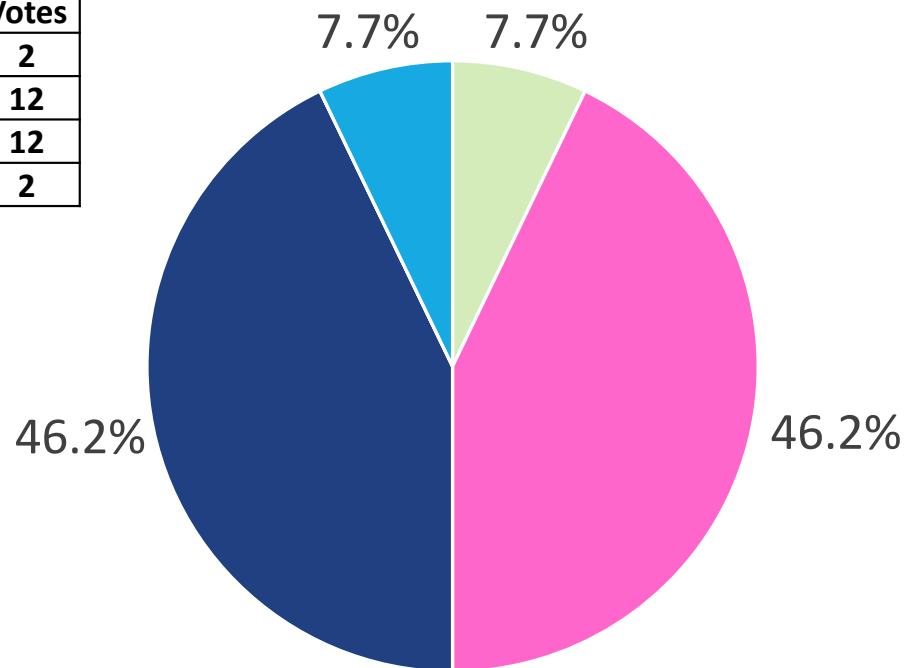

- ADT short-term (6-12 months)
- ADT mid-term (12-24 months)
- ADT long term (24-36 months)
- ADT lifelong
- I do not recommend ADT treatment

9. Which imaging modality(ies) do you most often use for patients with rising PSA after radical radiation therapy of the prostate?

| Opt | Votes |
|-----|-------|
|     | 4     |
|     | 24    |

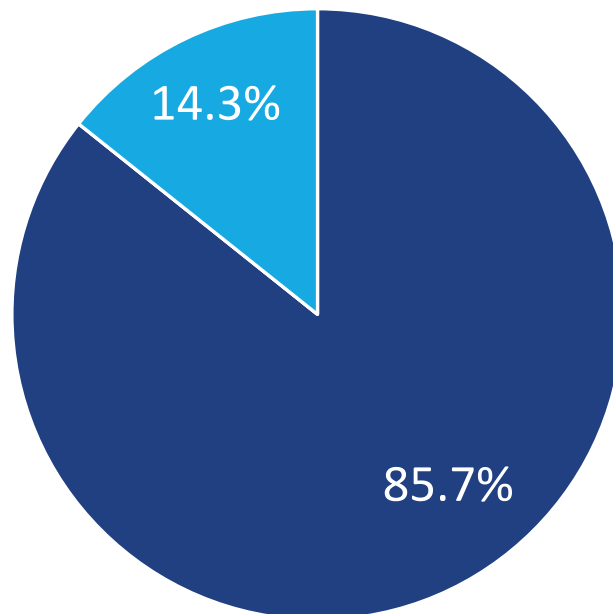

- CT and bone scintigraphy (plus/minus pelvic MRI)
- Whole-body MRI alone (plus/minus pelvic MRI)
- PSMA PET CT/MRI (plus/minus pelvic MRI)

10. For the majority of post-prostatectomy patients with isolated rising PSA only, if salvage RT is planned, at what confirmed upper PSA level do you recommend starting salvage radiation therapy?

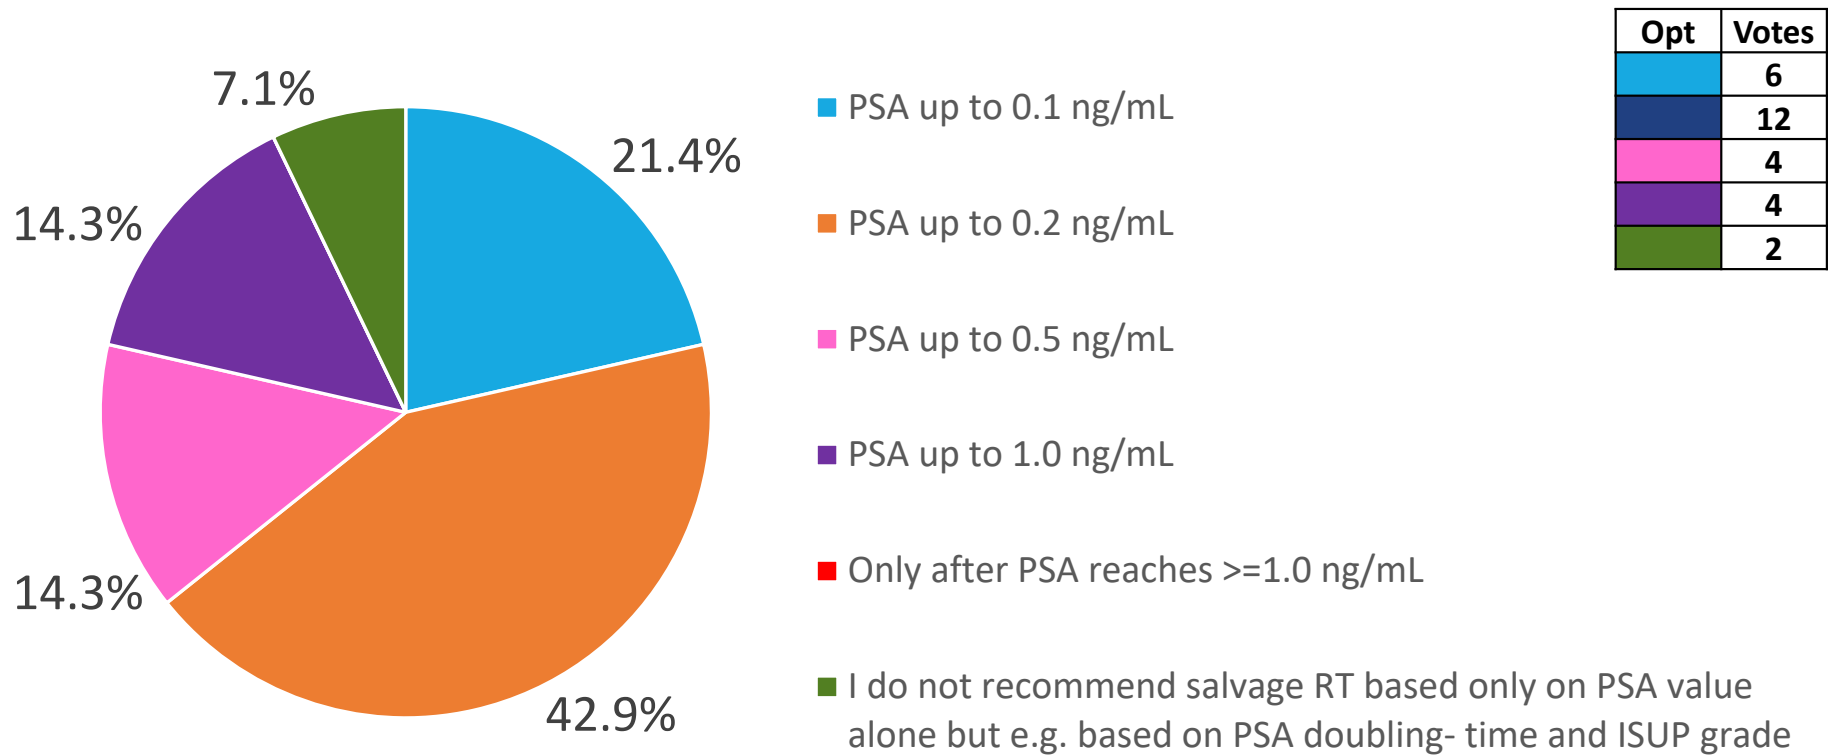

11. Do you recommend systemic (ADT) hormonal treatment in combination with salvage radiation therapy for patients with PSA recurrence after radical prostatectomy?

| Opt | Votes |
|-----|-------|
| ■   | 13    |
| ■   | 12    |
| ■   | 3     |

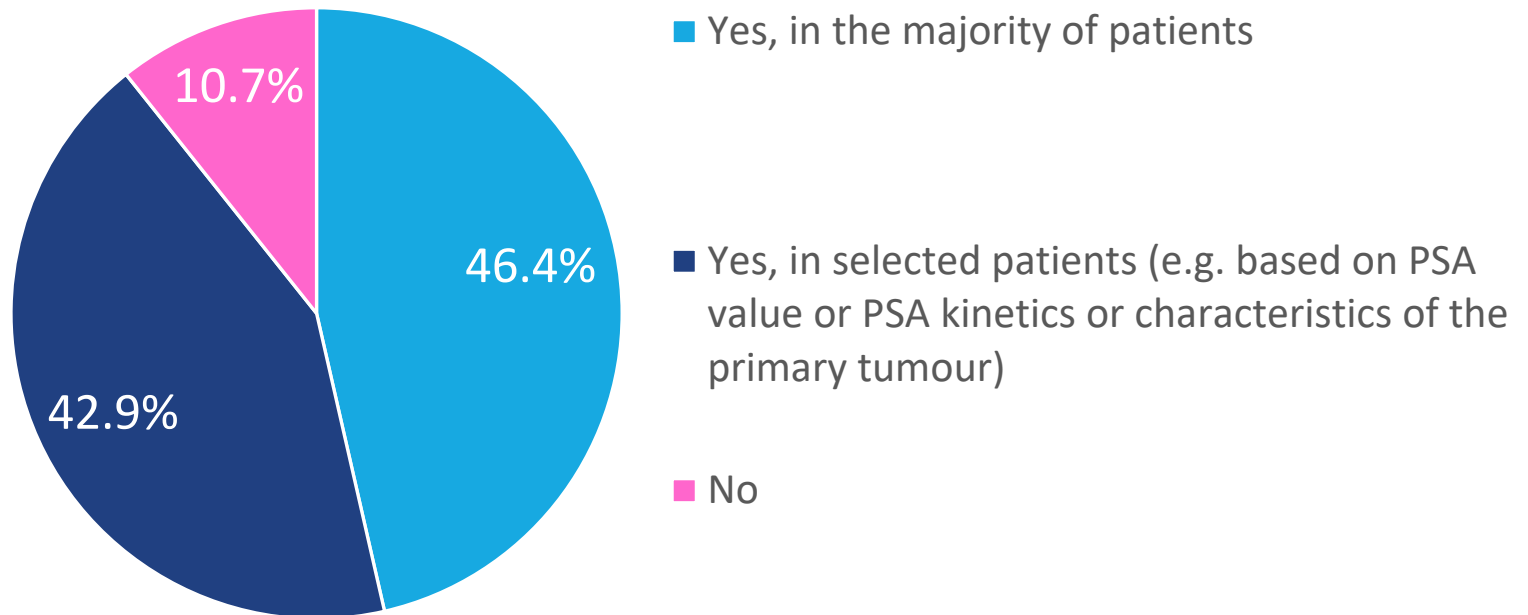



12. What systemic (ADT) hormonal therapy do you most often recommend in combination with salvage radiation therapy?

| Opt | Votes |
|-----|-------|
|     | 3     |
|     | 25    |

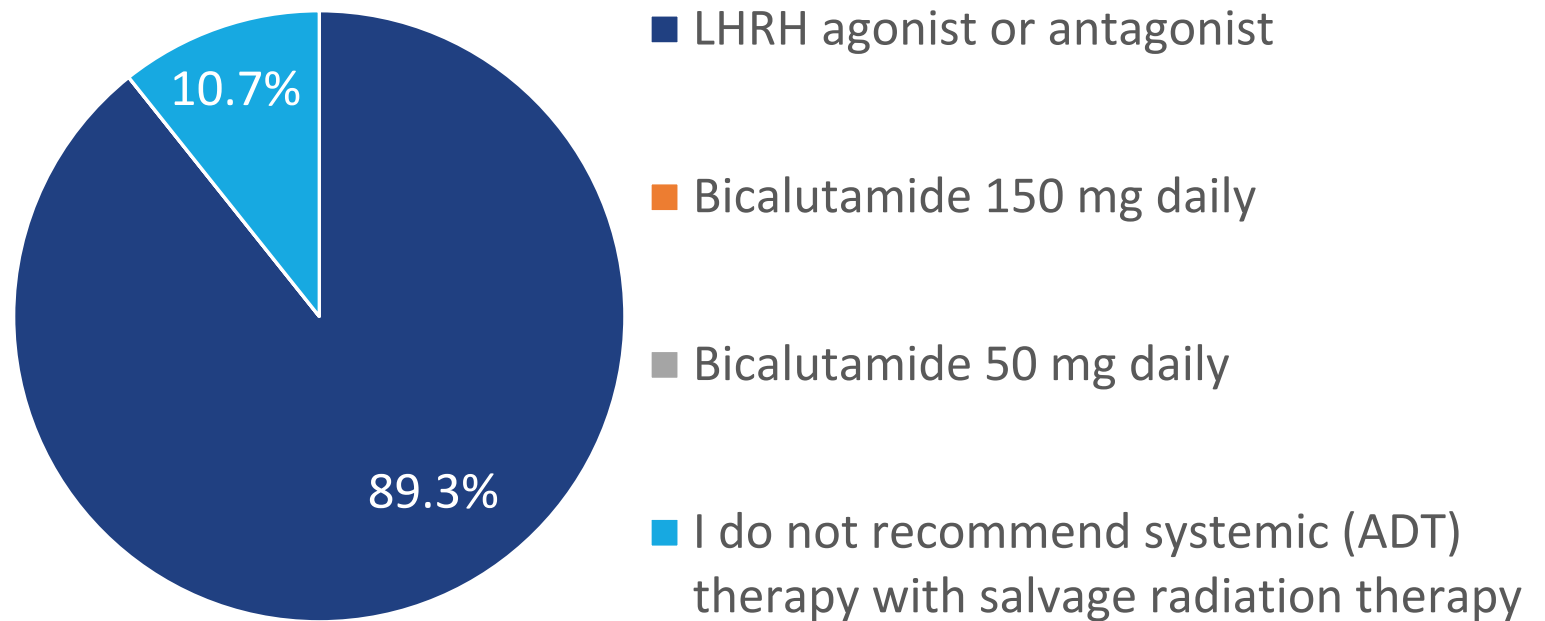

13. What duration of systemic (ADT) hormonal treatment do you most often recommend in combination with salvage radiation therapy?

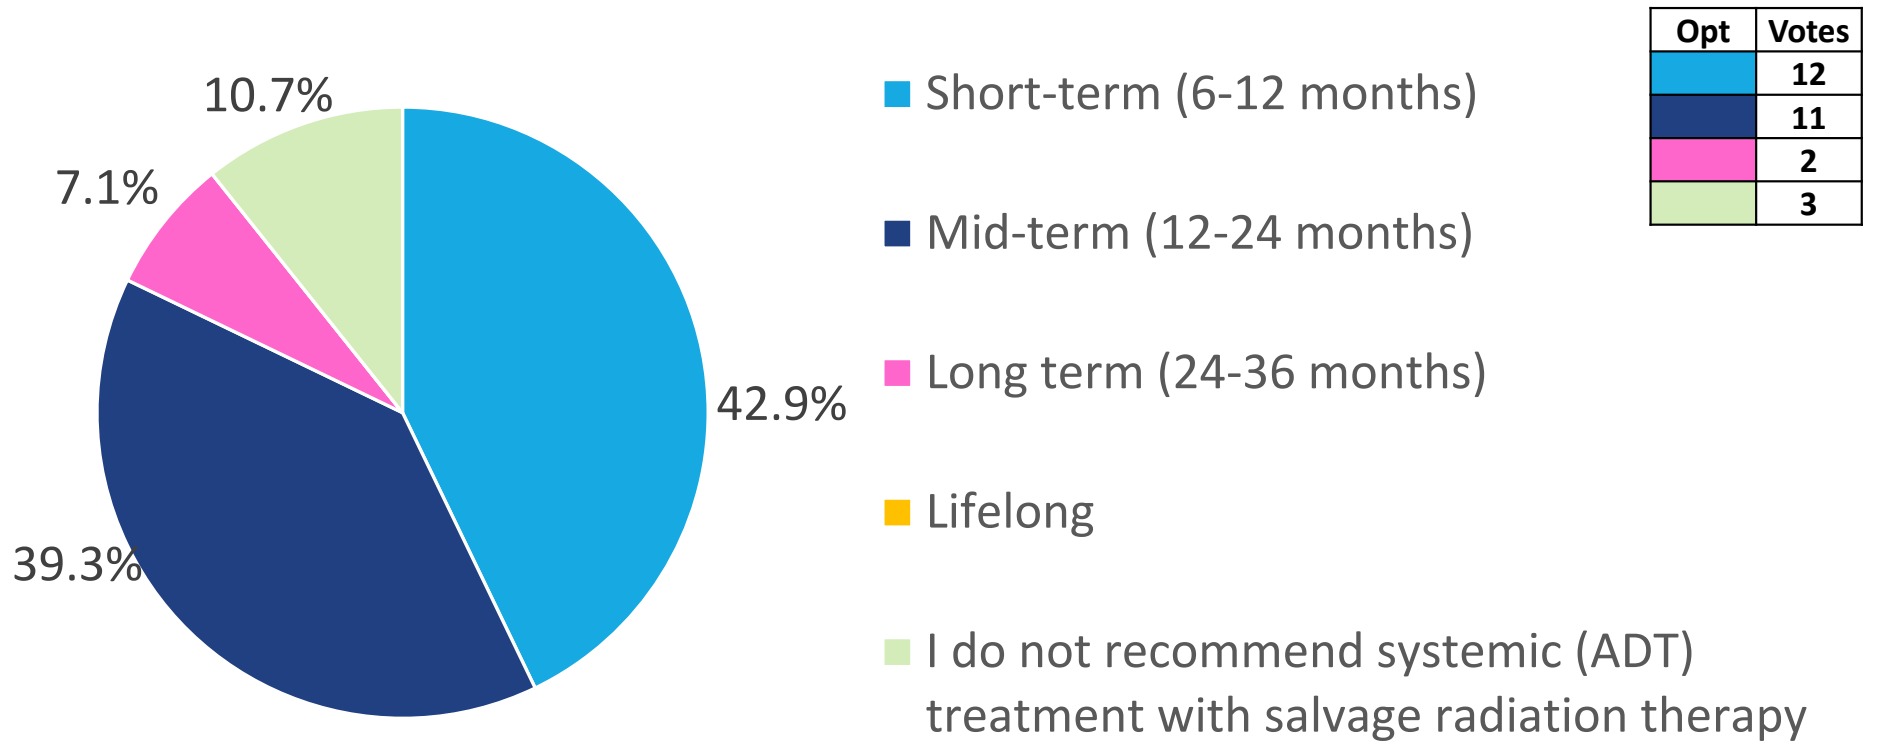

14. When repeat imaging is conducted four to eight weeks after radical prostatectomy and shows no evidence of macroscopic disease, which treatment do you most often recommend for an asymptomatic pN0 patient with PSA persistence ( $\leq 0.1$  ng/mL and confirmed not to be falling)?

| Opt | Votes |
|-----|-------|
| ■   | 5     |
| ■   | 10    |
| ■   | 10    |
| ■   | 3     |

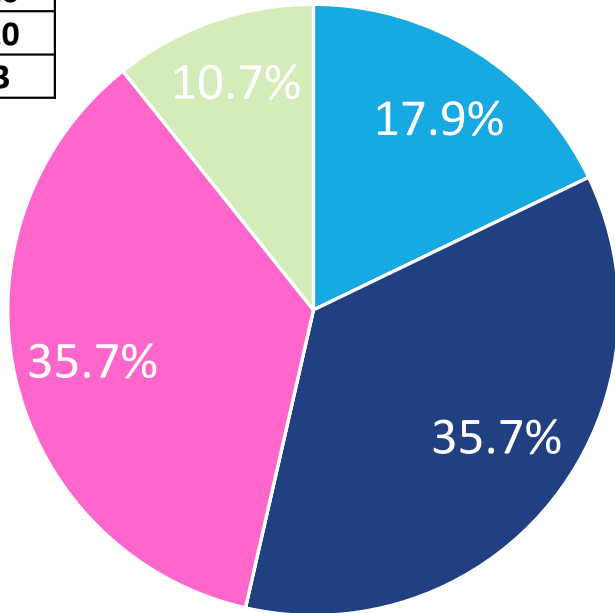

- Salvage radiation therapy without systemic hormonal treatment
- Salvage radiation therapy with systemic hormonal treatment
- Systemic hormonal treatment alone
- No immediate active treatment, PSA surveillance
- I do not recommend repeat imaging

15. In men with non-metastatic disease on conventional imaging and confirmed rising PSA following salvage radiation therapy (or ineligible for salvage radiation therapy), what would be your recommended treatment strategy?

| Opt | Votes |
|-----|-------|
| ■   | 7     |
| ■   | 21    |

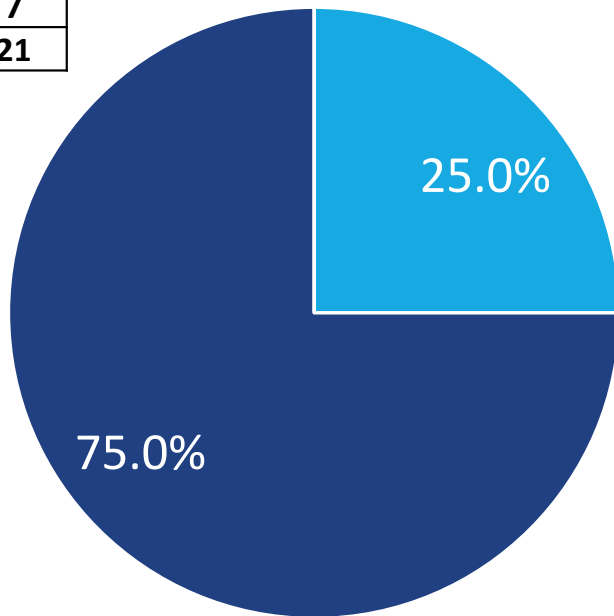

- Long-term ADT (continuous or intermittent), in the majority of patients
- Long-term ADT (continuous or intermittent), in selected patients e.g. PSA >10ng/ml post RT, or PSA > 5 ng/mL post RP, or PSADT < 10 months
- No long-term ADT, I only recommend ADT after detection of metastatic disease

16. Based on the current literature, do you think that local treatment of the primary tumour has an overall survival benefit in:

| Opt | Votes |
|-----|-------|
| ■   | 1     |
| ■   | 26    |
| ■   | 1     |

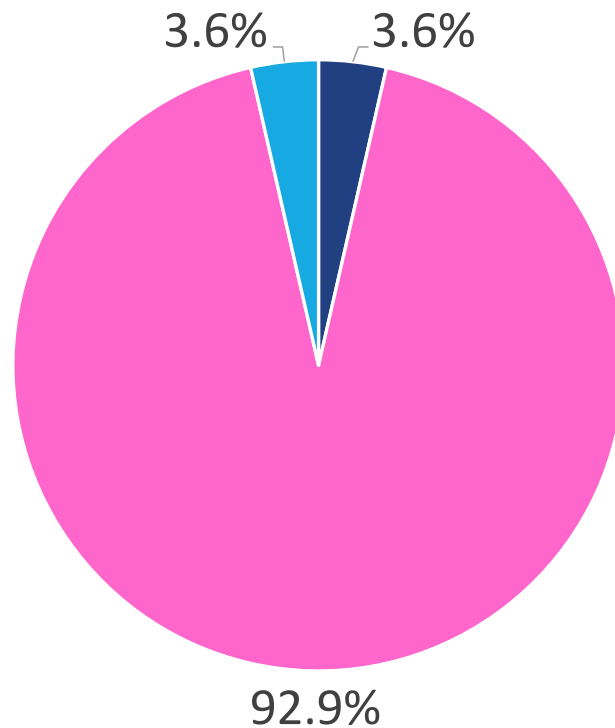

- Majority of patients with newly diagnosed metastatic (M1) castration-sensitive/naïve prostate cancer (CSPC/CNPC) regardless of metastatic volume
- Only patients with low-volume/burden newly diagnosed metastatic (M1) castration-sensitive/naïve prostate cancer (CSPC/CNPC)
- No clear benefit in any patients

17. What is your preferred local treatment of the prostate in the majority of patients with newly diagnosed low-volume/burden metastatic (M1) castration-sensitive/naïve prostate cancer (CSPC/CNPC)?

| Opt | Votes |
|-----|-------|
|     | 2     |
|     | 26    |

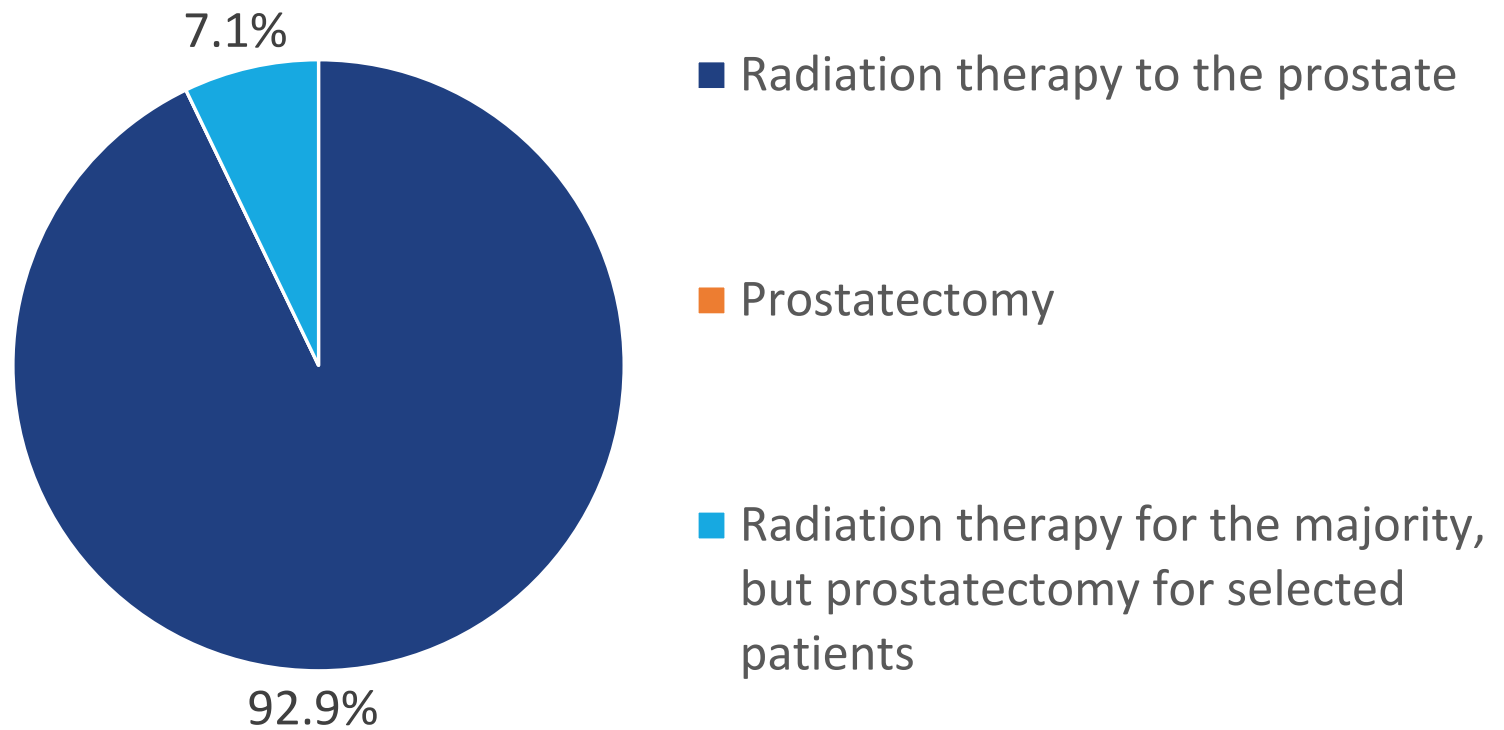

18. For patients with newly diagnosed metastatic (M1) castration-sensitive/naïve prostate cancer (CSPC/CNPC), is it appropriate to extrapolate data from STAMPEDE (radiation therapy of the prostate) to radical surgery of the prostate?

| Opt | Votes |
|-----|-------|
| Yes | 8     |
| No  | 20    |

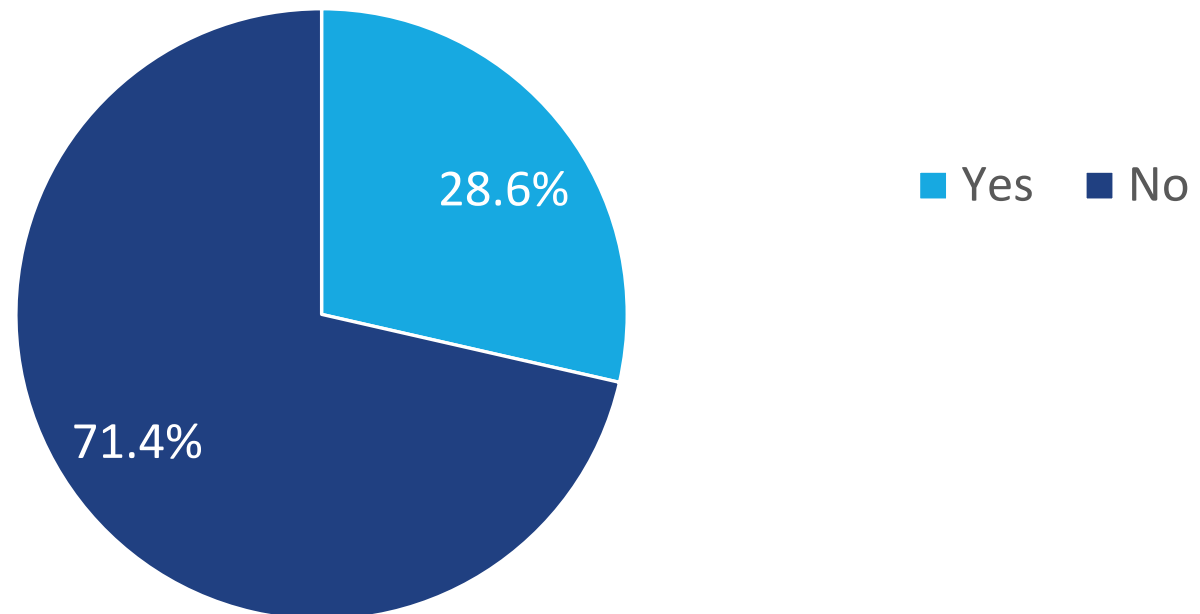

19. Do you recommend that the radiation treatment volume encompass the pelvic lymph nodes with radiation therapy of the primary tumour in patients with newly diagnosed low-volume/burden metastatic (M1) castration-sensitive/ naïve prostate cancer (CNPC) who also have clinical pelvic N1 disease?

| Opt | Votes |
|-----|-------|
| ■   | 13    |
| ■   | 15    |

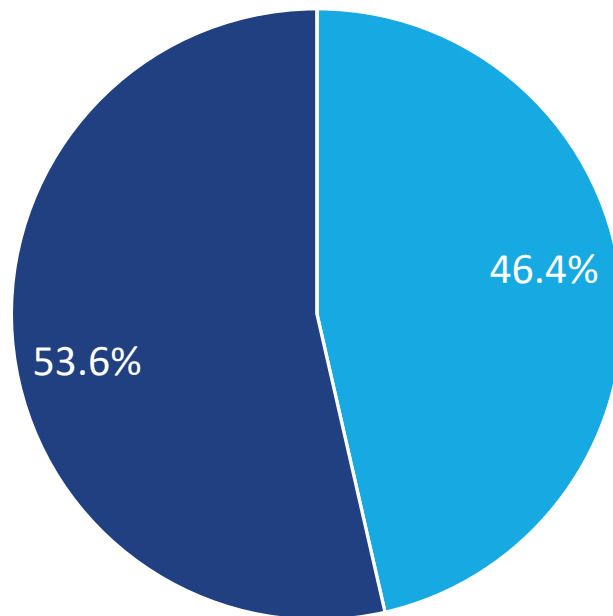

- Yes (radiation therapy of the primary and pelvic lymph nodes)
- No (radiation therapy only of the primary)
- I don't recommend radiation treatment of the primary tumour



20. In your opinion, which terminology best describes metastatic prostate cancer in patients who are about to start ADT?

| Opt | Votes |
|-----|-------|
| ■   | 5     |
| ■   | 11    |
| ■   | 1     |
| ■   | 9     |
| ■   | 2     |

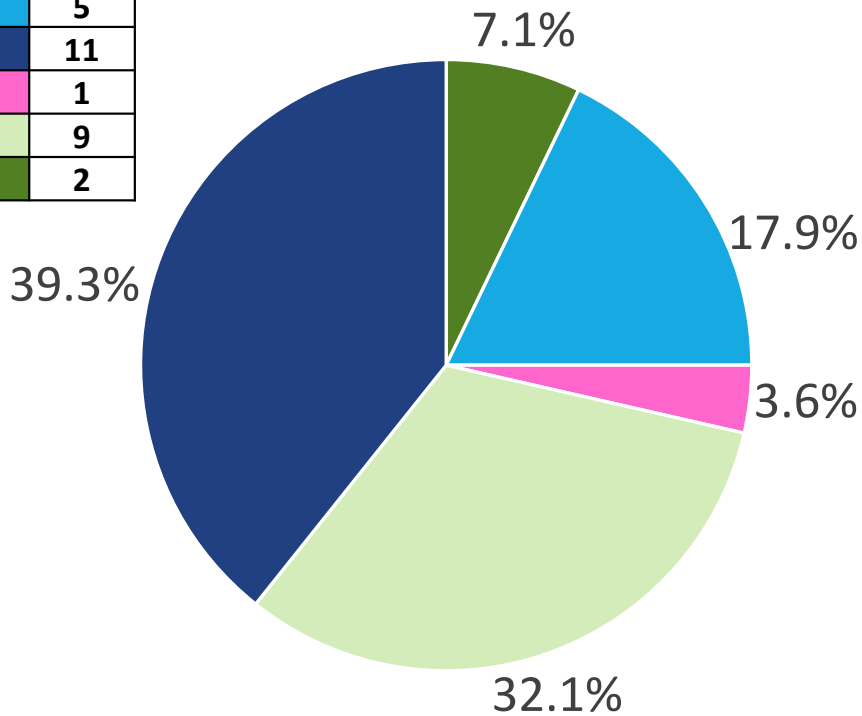

- Hormone-naïve metastatic prostate cancer
- Hormone-sensitive metastatic prostate cancer
- Metastatic prostate cancer receiving first-line systemic therapy
- Castration-naïve metastatic prostate cancer
- Castration-sensitive metastatic prostate cancer

21. In your opinion, which terminology best describes patients with metastatic prostate cancer who are progressing (testosterone level <50ng/mL)

| Opt | Votes |
|-----|-------|
| ■   | 26    |
| ■   | 2     |

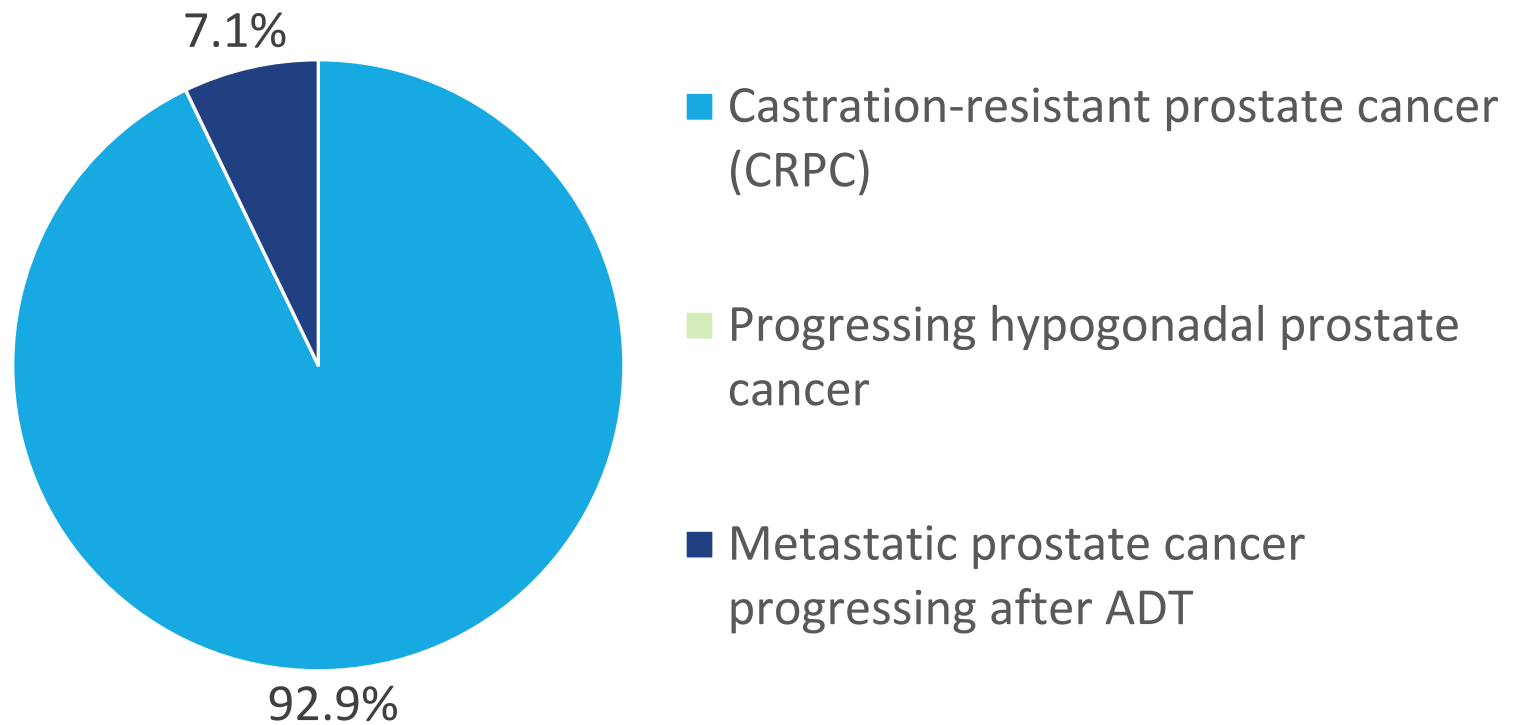

22. Do you recommend measuring total testosterone level before starting first-line treatment with ADT?

| Opt | Votes |
|-----|-------|
| ■   | 16    |
| ■   | 3     |
| ■   | 9     |

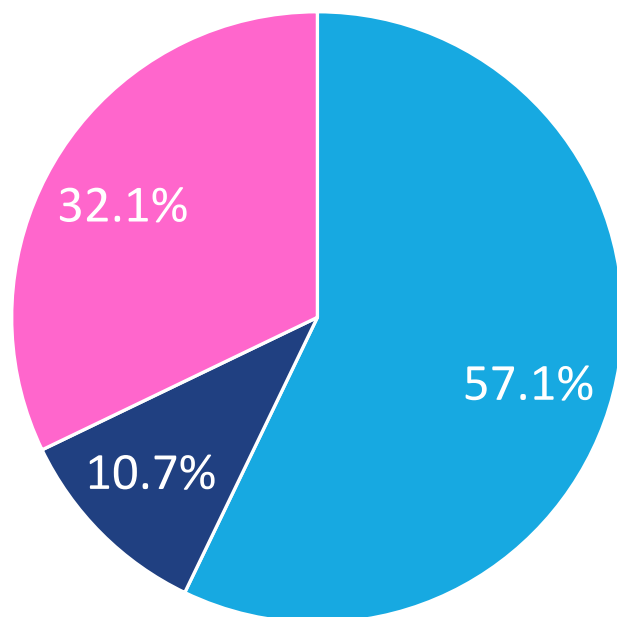

■ Yes, in the majority of patients

■ Yes, in the minority of patients

■ No

23. In patients with high suspicion of metastatic prostate cancer (based on PSA, imaging) do you recommend histopathological confirmation of prostate cancer (either before or after initiation of ADT)?

| Opt                              | Votes |
|----------------------------------|-------|
| Yes, in the majority of patients | 24    |
| Yes, in the minority of patients | 2     |
| No                               | 2     |

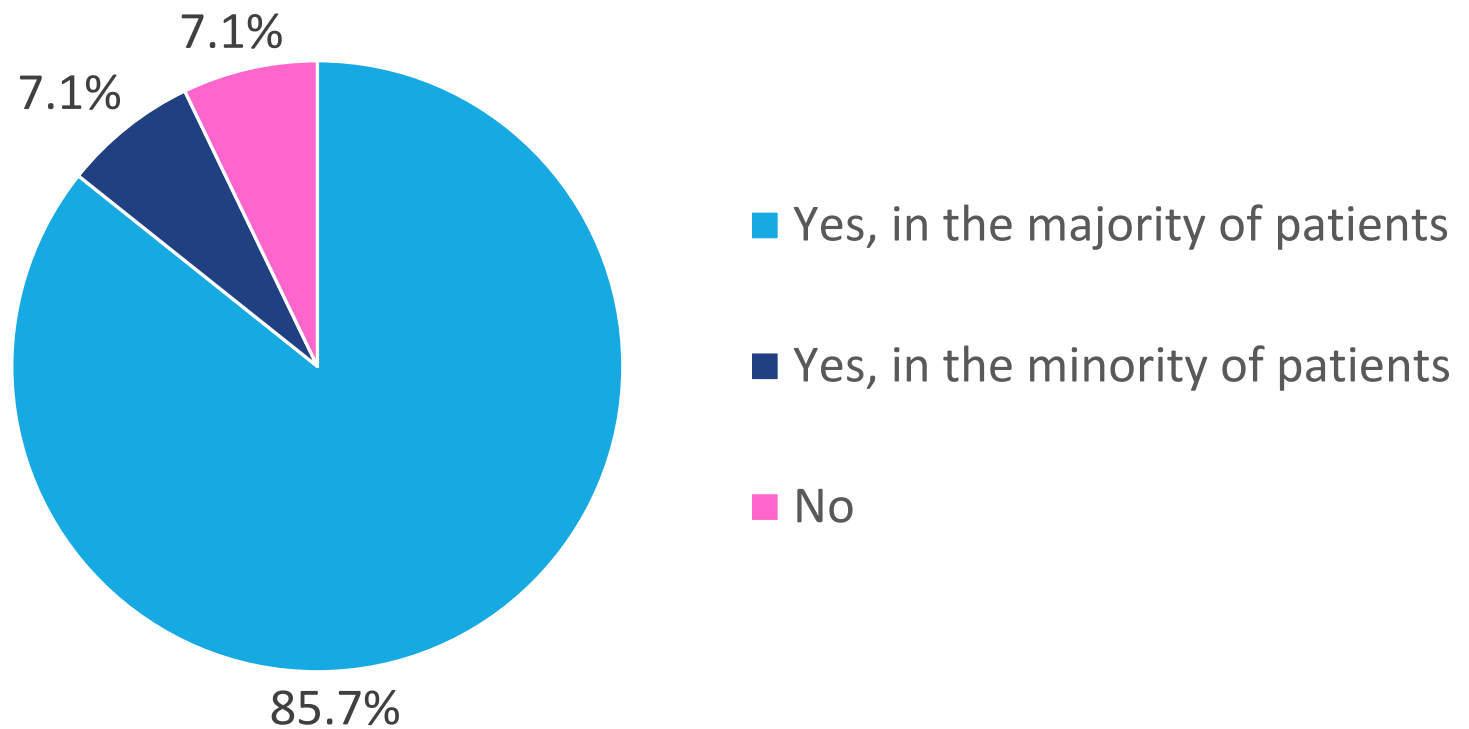

24. In symptomatic patients with high suspicion of metastatic prostate cancer (PSA, imaging) do you initiate ADT before histopathological confirmation of prostate cancer?

| Opt                                         | Votes |
|---------------------------------------------|-------|
| Yes, in the majority of syptomatic patients | 28    |
| Yes, in the minority of patients            | 9     |
| No                                          | 1     |

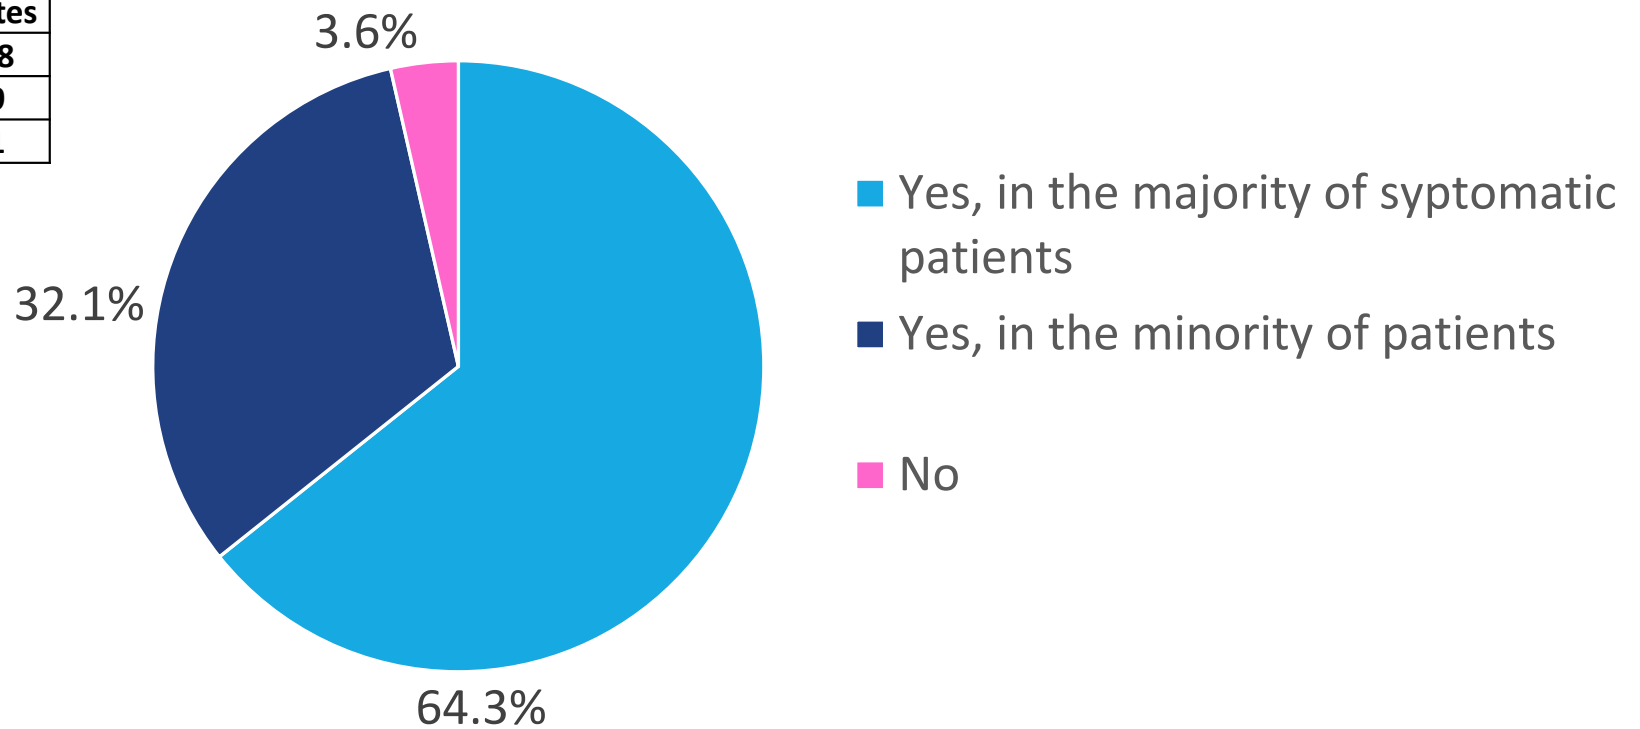

25. Do you recommend a short course of a first-generation non-steroidal AR antagonist (NSAA) as flare protection when you initiate GnRH agonist therapy and AR targeted therapy in patients with newly diagnosed metastatic (M1) castration-sensitive/naïve prostate cancer (CSPC/CNPC)?

| Opt | Votes |
|-----|-------|
| ■   | 22    |
| ■   | 6     |

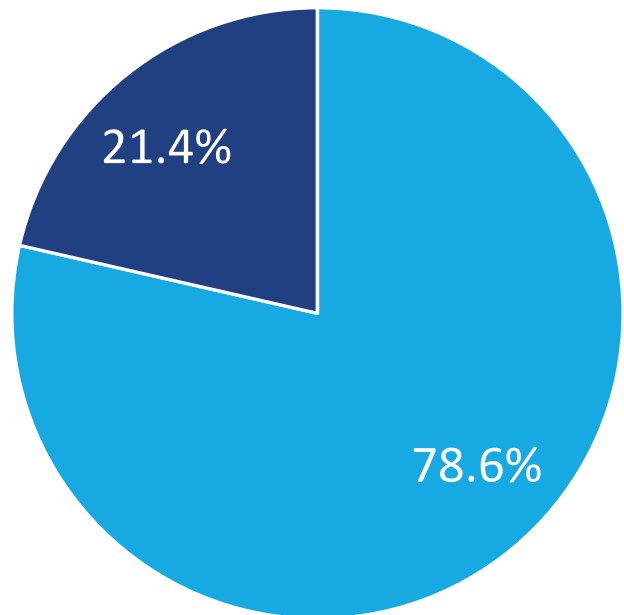

- Yes, in the majority of patients
- Yes, but only if AR targeted therapy is not started at the same time
- No

26. In patients who received docetaxel in castration-sensitive, castration-naïve setting, what is your treatment approach for the majority of patients for whom you like to treat with a second chemotherapy course in the mCRPC setting?

| Opt | Votes |
|-----|-------|
| ■   | 15    |
| ■   | 13    |

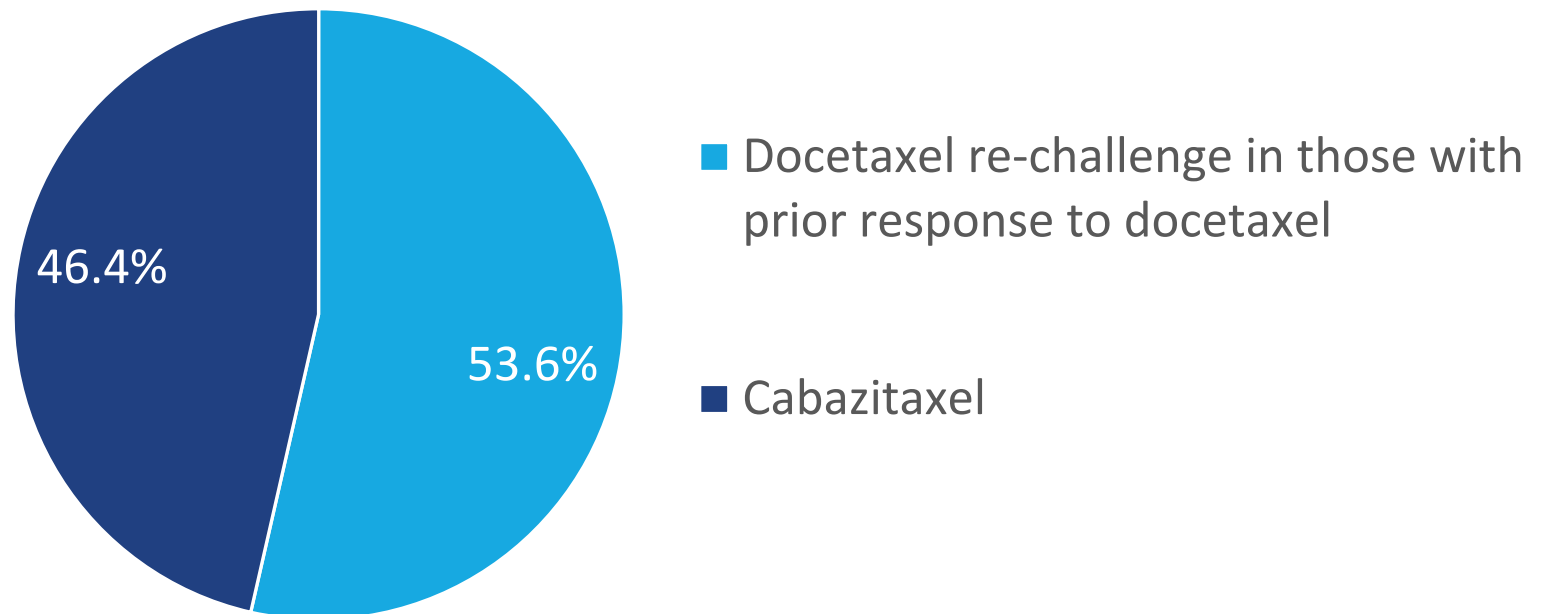

27. For the majority of patients with newly diagnosed metastatic (M1) castration-sensitive/naïve prostate cancer (CSPC/CNPC) based on conventional imaging, what additional imaging modalities do you use to guide selection of systemic treatment?

| Opt | Votes |
|-----|-------|
| ■   | 1     |
| ■   | 27    |

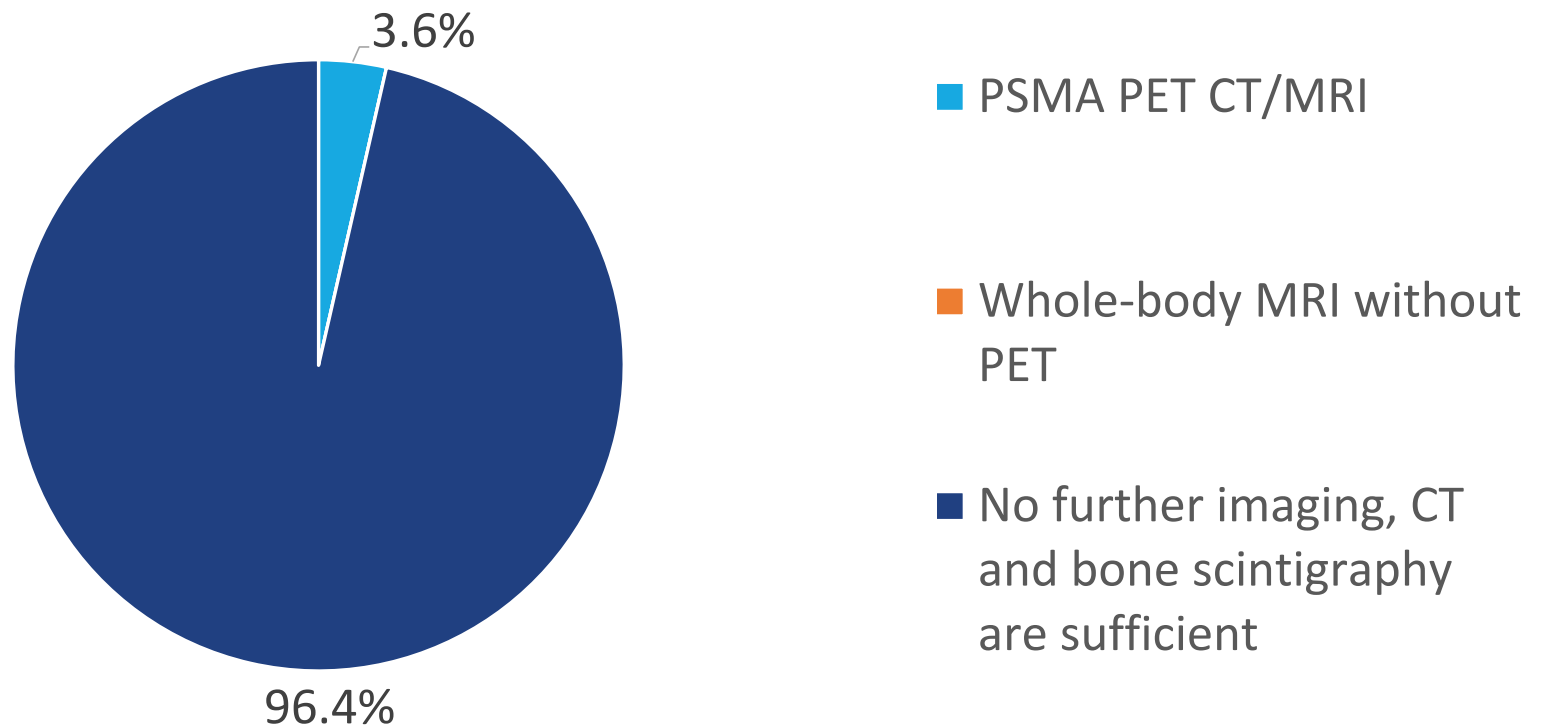



28. Is there a subset of patients with mCSPC for whom you would consider drug-holidays, intermittent, or fixed duration treatment approach?

| Opt | Votes |
|-----|-------|
| ■   | 14    |
| ■   | 9     |
| ■   | 5     |

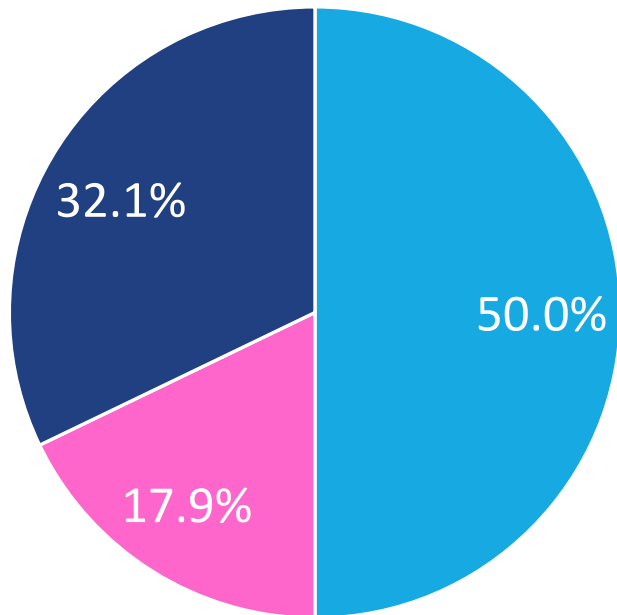

- In a majority of patients with mCSPC or mCNPC
- In selected patients (ie patients with oligometastatic disease who has received treatment to primary, metastases directed treatment of all lesions, and 2 years of intensification to ADT)
- In selected patients (ie patients with only node positive disease who have received 2 years of intensification to ADT)
- I would not recommend in patients until more evidence becomes available

29. Do you recommend adding a first-generation non-steroidal AR antagonist (NSAA) to ADT for patients with nmCRPC (M0 CRPC)?

| Opt | Votes |
|-----|-------|
| ■   | 14    |
| ■   | 9     |
| ■   | 5     |

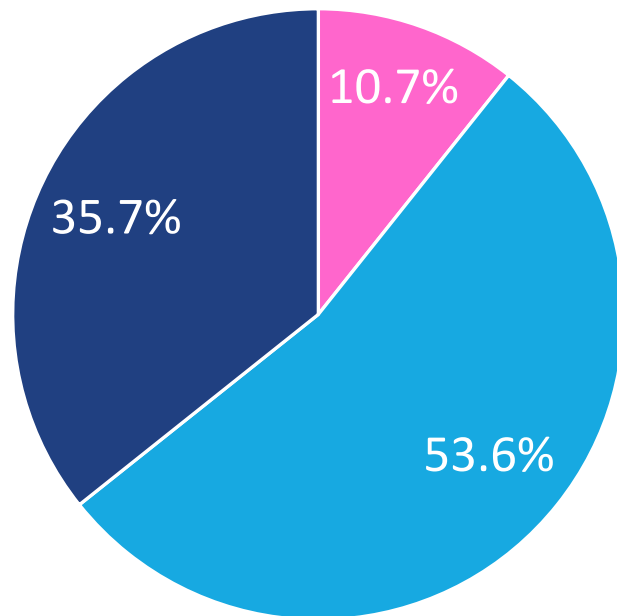

- Yes, in the majority of patients
- Yes, in patients with PSADT >10 months
- No

30. For patients with nmCRPC (M0 CRPC), with an untreated primary, showing PSA progression only during treatment with AR pathway inhibitor do you recommend radiation to the primary as an approach to stretch the time to next subsequent treatment?

| Opt | Votes |
|-----|-------|
| ■   | 5     |
| ■   | 16    |
| ■   | 7     |

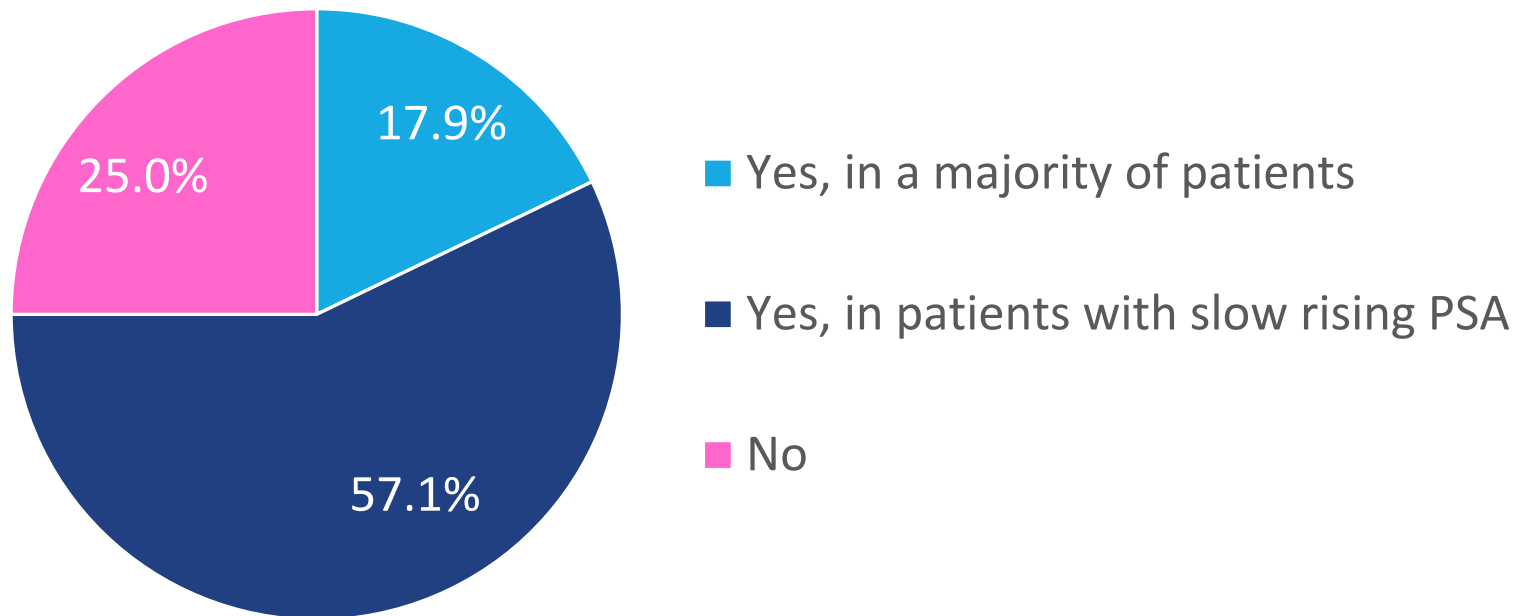

31. For patients with nmCRPC (M0 CRPC) and no evidence of disease outside the prostate bed who have received previous radical prostatectomy but no prior local radiation therapy, do you recommend salvage radiation therapy to delay intensifying systemic therapy if recurrence in the prostate bed is confirmed?

| Opt | Votes |
|-----|-------|
| ■   | 11    |
| ■   | 9     |
| ■   | 8     |

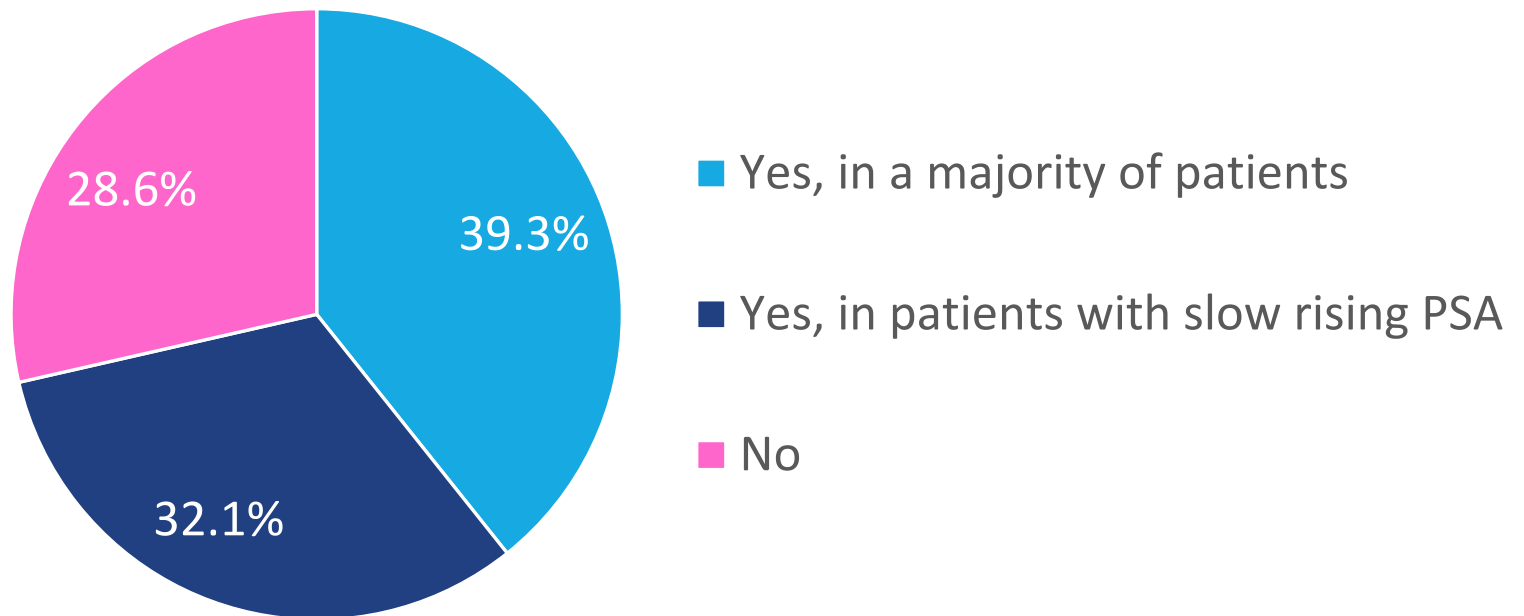

32. At the time of PSA progression (alone) for asymptomatic mCRPC pts treated with abiraterone plus prednisone, do you switch the steroid from prednisone to dexamethasone?

| Opt | Votes |
|-----|-------|
| Yes | 24    |
| No  | 2     |

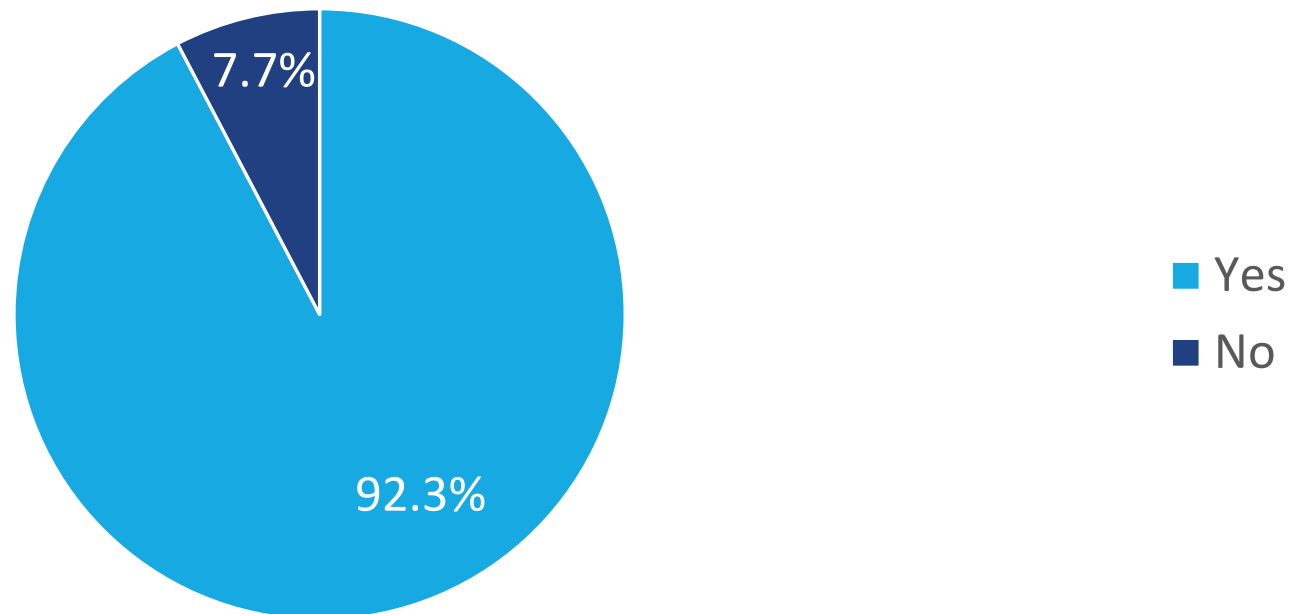

33. Is there a role for biomarker testing (ie AR-V7 or other, assume access is available) as an approach to select candidates who may potentially respond to a second AR pathway inhibitor at some point later in the treatment continuum?

| Opt                         | Votes |
|-----------------------------|-------|
| Yes, in a majority of cases | 2     |
| Yes, in selected of cases   | 12    |
| No                          | 14    |

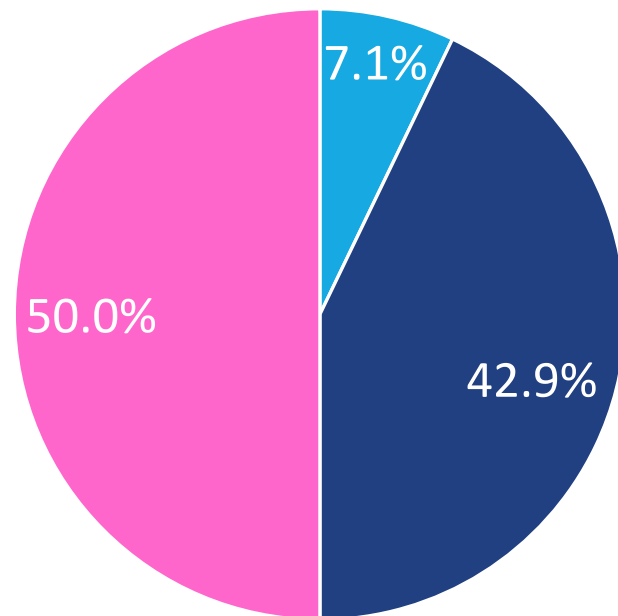

- Yes, in a majority of cases
- Yes, in selected of cases
- No

34. Do you recommend bicalutamide as sole additional therapy to ADT in patients with mCRPC?

| Opt | Votes |
|-----|-------|
| ■   | 25    |
| ■   | 3     |

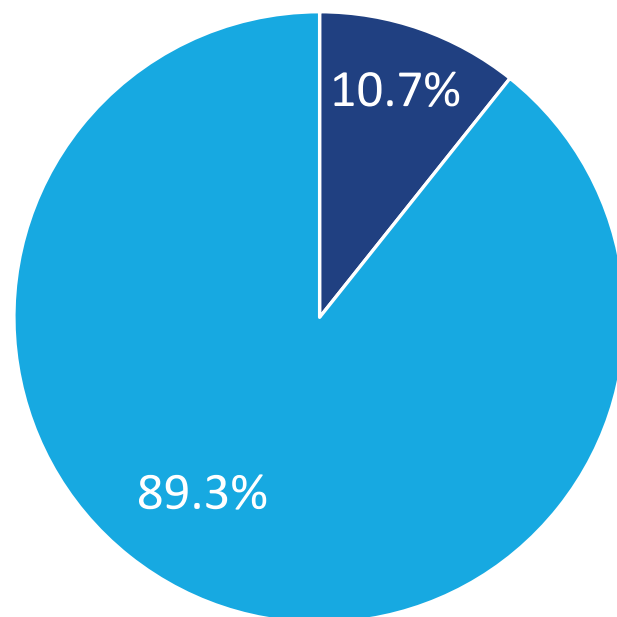

- Yes, in a majority of patients
- Yes, in a minority of patients
- No

35. Which treatment would you recommend for patients with mCRPC who have failed docetaxel and prior AR pathway inhibitors? Assume there are no regulatory or access limitations.

| Opt | Votes |
|-----|-------|
|     | 3     |
|     | 7     |
|     | 3     |
|     | 15    |

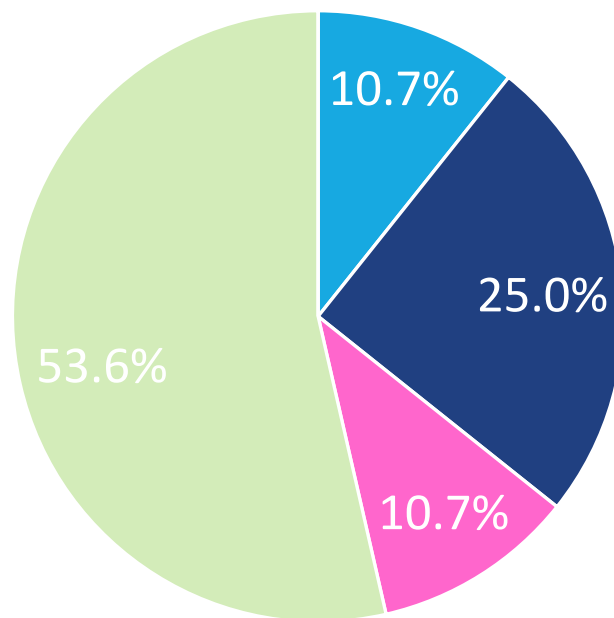

- Lutetium-PSMA, in the majority of patients
- Cabazitaxel, in the majority of patients
- Radium-223, in the majority of patients if eligible
- Either of the options
- None of the options



36. Do you routinely screen for osteoporosis risk factors (e.g. current/history of smoking, corticosteroids, family history of hip fracture, personal history of fractures, rheumatoid arthritis, >3 alcohol units/day, BMI) in patients with prostate cancer starting on long-term ADT?

| Opt | Votes |
|-----|-------|
| ■   | 16    |
| ■   | 6     |
| ■   | 6     |

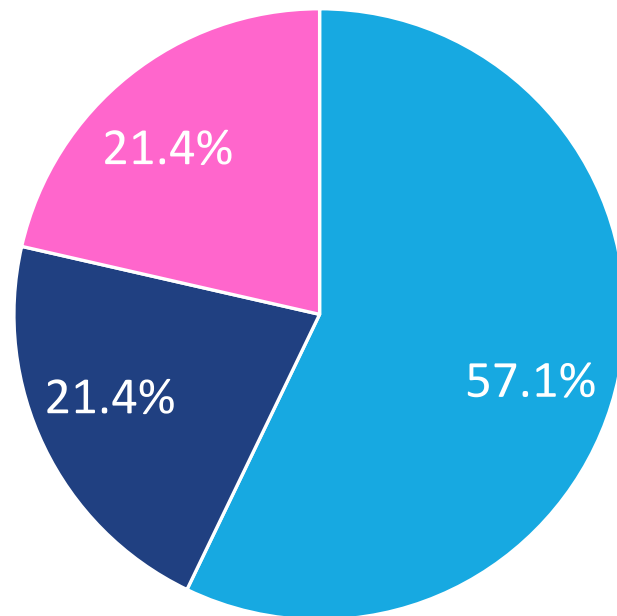

- Yes, in a majority of patients
- Yes, in a minority of patients
- No

37. Do you routinely recommend measurement of bone mineral density in patients with prostate cancer starting on long-term ADT?

| Opt                                | Votes |
|------------------------------------|-------|
| Yes, in a majority of patients     | 16    |
| Only in patients with risk factors | 6     |
| No                                 | 6     |

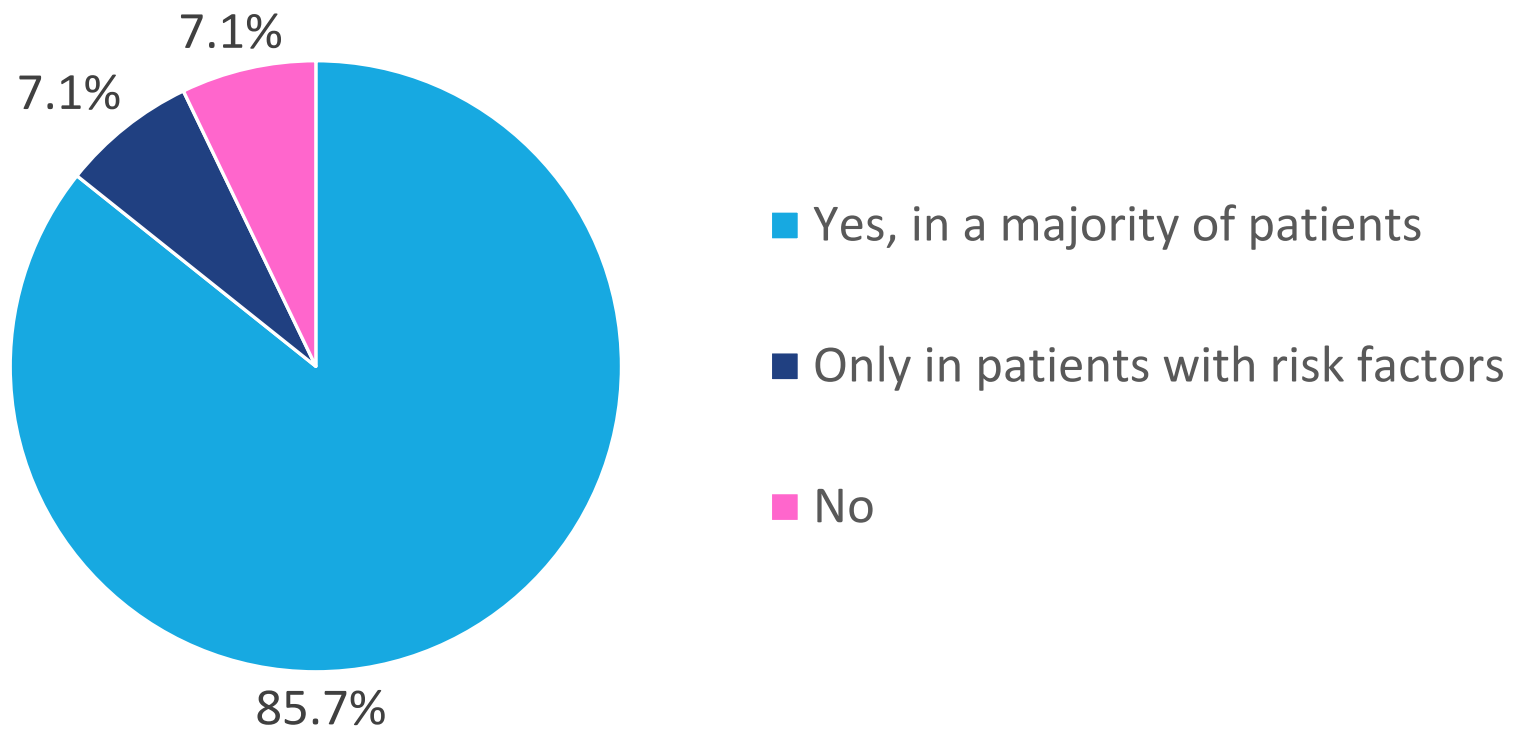

38. Is it appropriate to start an osteoclast-targeted therapy at the dose and schedule used for osteoporosis in order to prevent cancer treatment-induced bone loss (CTIBL)/fractures in patients with prostate cancer starting on long-term ADT without a bone mineral density measurement?

| Opt | Votes |
|-----|-------|
| ■   | 16    |
| ■   | 6     |
| ■   | 6     |

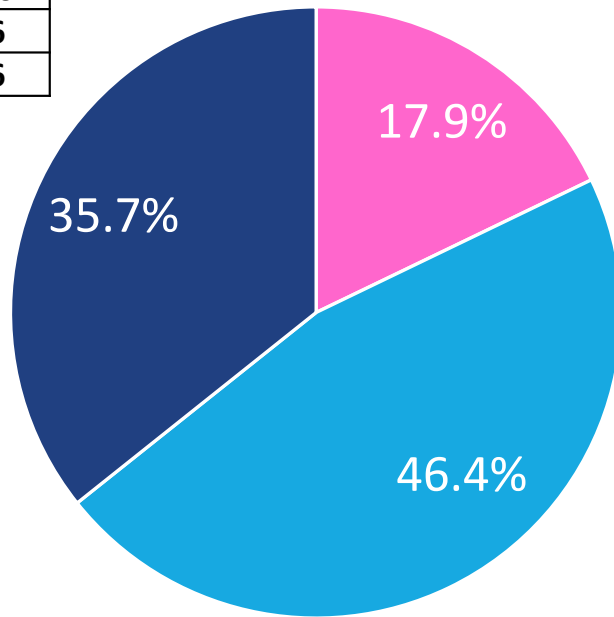

- Yes, in the majority of patients
- Only in patients with an increased risk of fractures (e.g. 10-year FRAX risk of  $\geq 3\%$  for hip fractures and/or  $\geq 20\%$  for all major fractures)
- No

39. For prostate cancer patients starting on long-term ADT who have NO documented osteoporosis on bone mineral density measurement, do you routinely recommend initiating denosumab or a bisphosphonate at the dose and schedule used for osteoporosis, in order to prevent cancer treatment-induced bone loss (CTIBL)/ fractures?

| Opt | Votes |
|-----|-------|
| ■   | 1     |
| ■   | 14    |
| ■   | 13    |

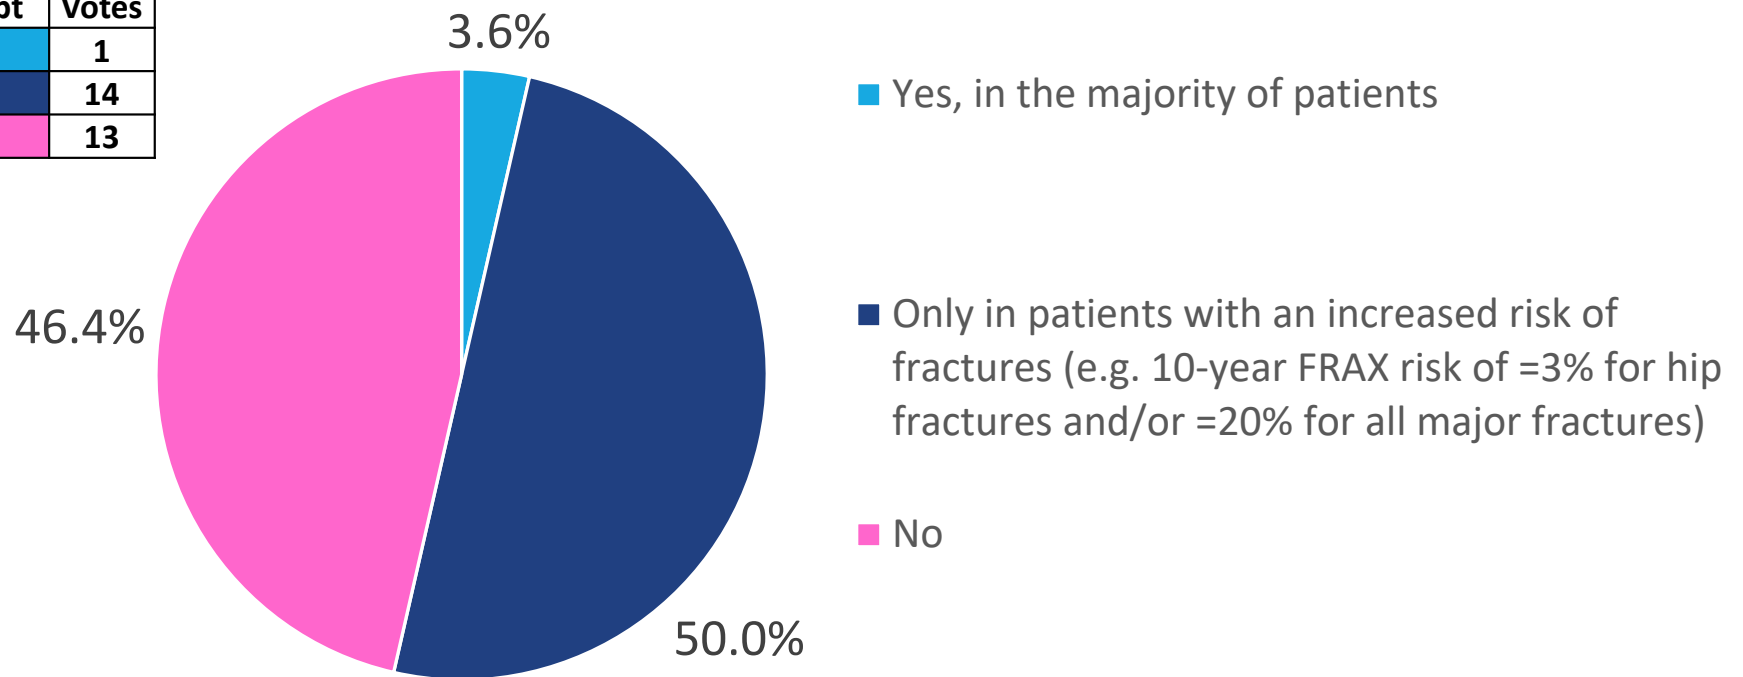

40. For patients starting on long-term ADT plus abiraterone/prednisone who have NO documented osteoporosis, do you routinely recommend initiating denosumab or a bisphosphonate at the dose and schedule used for osteoporosis, in order to prevent cancer treatment-induced bone loss (CTIBL)/ fractures?

| Opt | Votes |
|-----|-------|
| ■   | 2     |
| ■   | 14    |
| ■   | 12    |

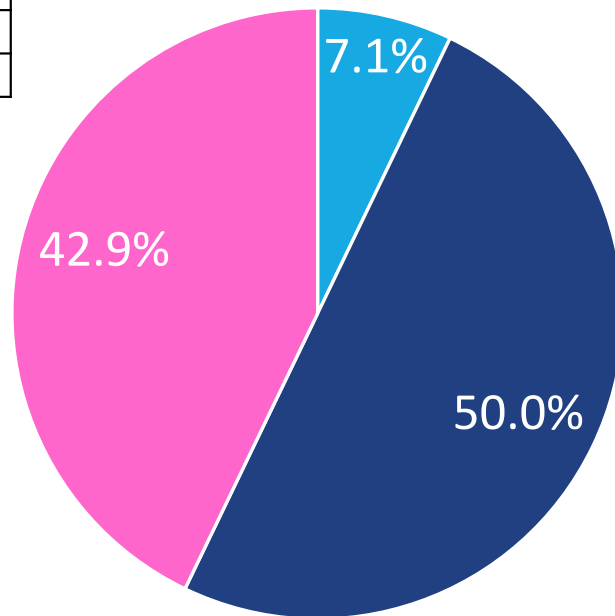

- Yes, in the majority of patients
- Only in patients with an increased risk of fractures (e.g. 10-year FRAX risk of ≥3% for hip fractures and/or ≥20% for all major fractures)
- No

41. In patients with CRPC and bone metastasis or mCRPC patients treated with radium-223, do you recommend osteoclast-targeted therapy (zoledronic acid or denosumab) at the higher dose and more frequent schedule used for reducing the risk of SRE (skeletal-related events) in patients with CRPC and bone metastases?

| Opt | Votes |
|-----|-------|
| ■   | 23    |
| ■   | 2     |
| ■   | 2     |
| ■   | 1     |

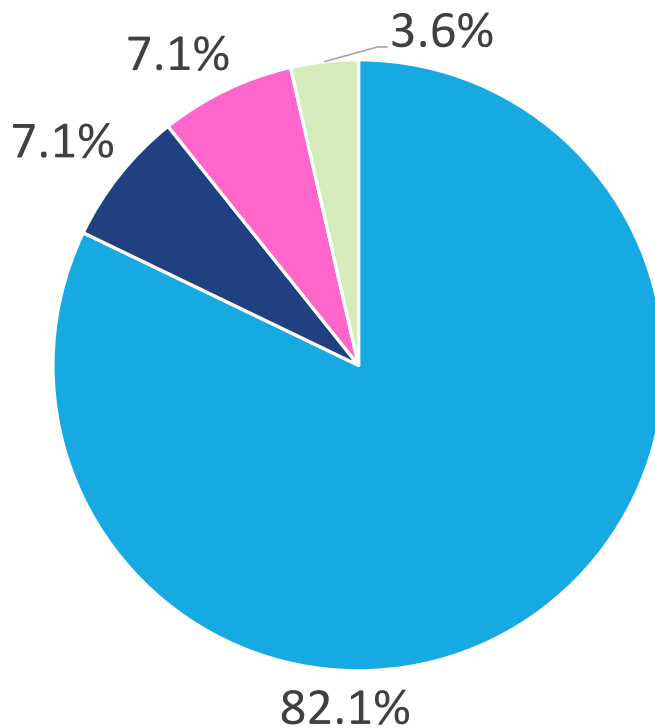

■ Yes, in the majority of patients

■ Yes, in a minority of patients

■ No, dose and schedule for osteoporosis are sufficient

■ No, I do not recommend osteoclast-targeted therapy in these patients

42. What treatment duration and frequency do you recommend when you use osteoclast-targeted therapy for reducing the risk of SRE in patients with mCRPC and bone metastases?

| Opt | Votes |
|-----|-------|
| ■   | 4     |
| ■   | 19    |
| ■   | 4     |
| ■   | 1     |

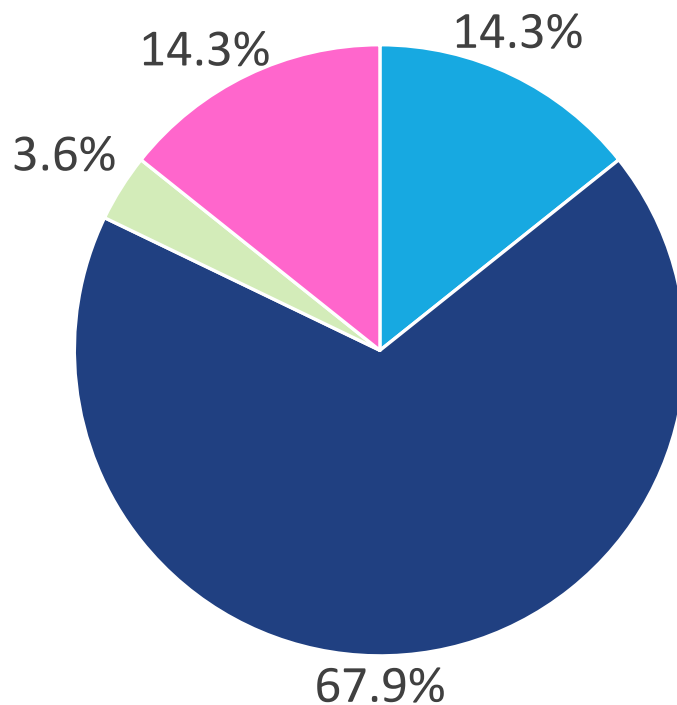

- Approximately 1 year and then stop or increase intervals of treatment
- Approximately 2 years and then stop or increase intervals of treatment
- Approximately 5 years and then stop or increase intervals of treatment
- Indefinitely

43. Do you recommend collecting a detailed family history of cancer for all patients with newly diagnosed metastatic (M1) castration-sensitive/naïve prostate cancer (CSPC/CNPC)?

| Opt | Votes |
|-----|-------|
| Yes | 25    |
| No  | 3     |

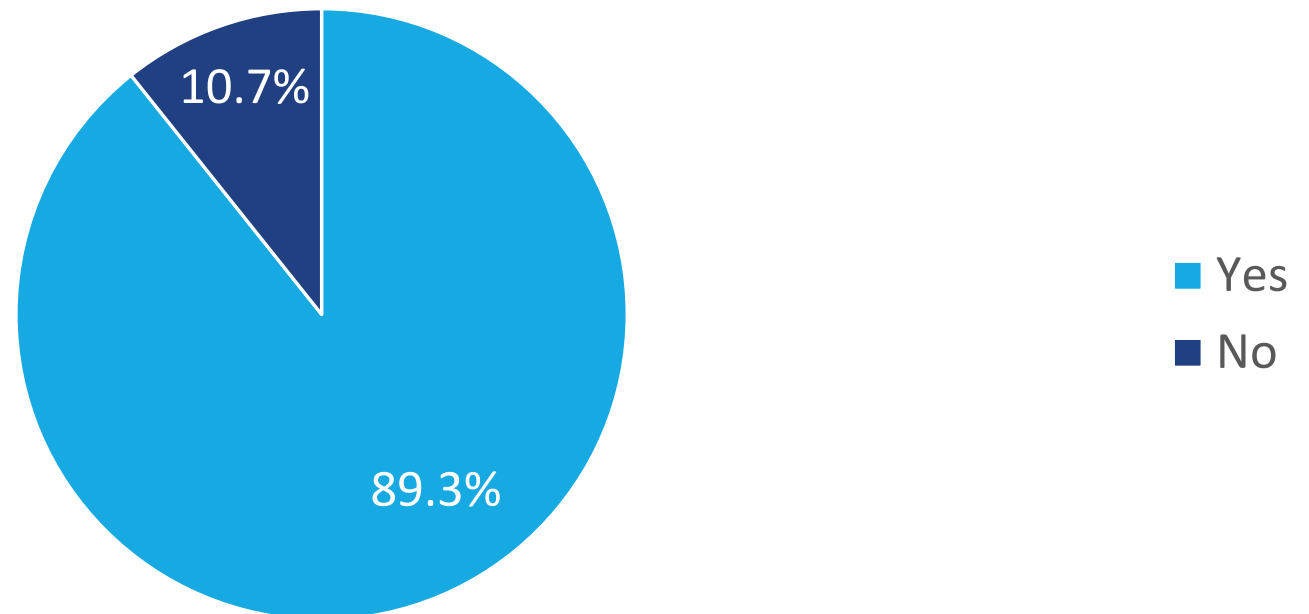



44. What is your preferred strategy for dose calculation of chemotherapy to treat patients who are highly obese?

| Opt | Votes |
|-----|-------|
| ■   | 4     |
| ■   | 16    |
| ■   | 7     |
| ■   | 1     |

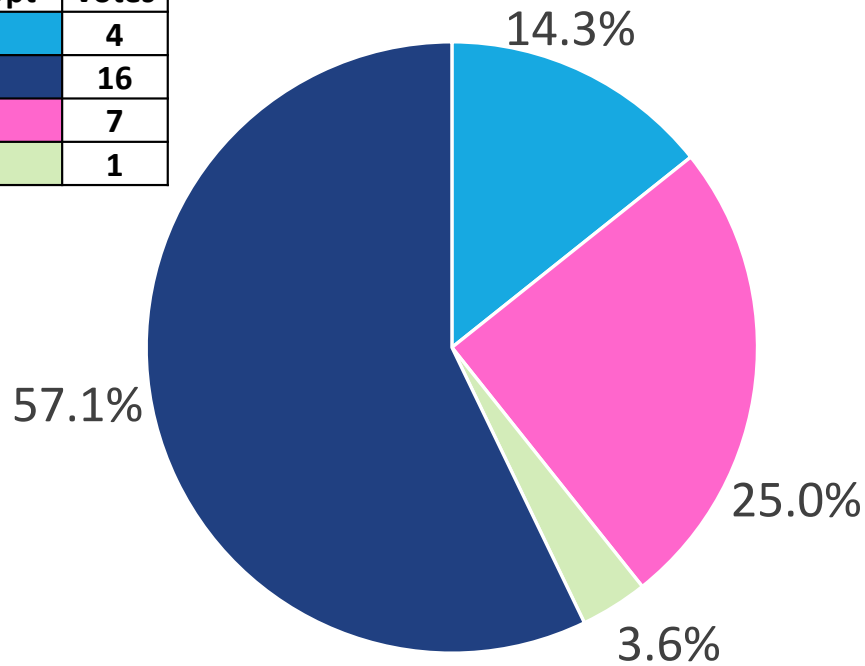

- Treat at full dose according to actual body surface area
- Cap the dose at an arbitrary BSA (e.g. 2.0 m<sup>2</sup>) or cytotoxic dose
- Use actual BSA but reduce the mg/m<sup>2</sup> dose
- I do not prescribe chemotherapy

45. Can we extrapolate mCRPC clinical trial data regarding efficacy to the treatment of patients who are older than the majority of patients enrolled in these trials?

| Opt | Votes |
|-----|-------|
| Yes | 24    |
| No  | 4     |

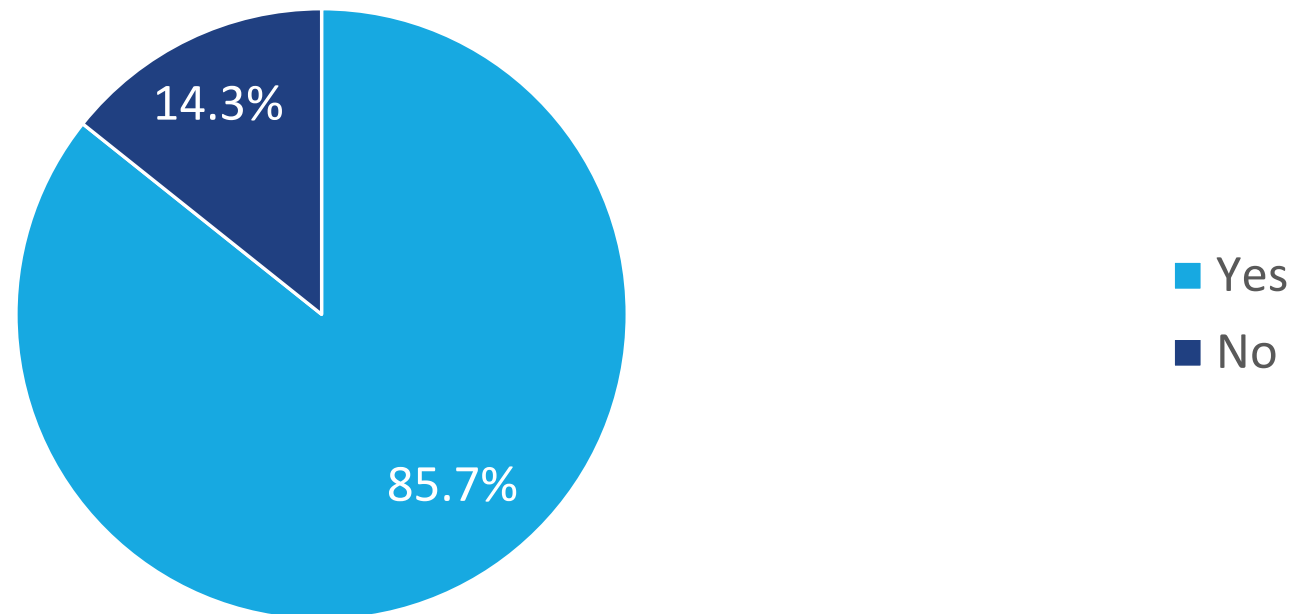

46. Can we extrapolate mCRPC clinical trial data regarding toxicity to the treatment of patients who are older than the majority of patients enrolled in these trials?

| Opt | Votes |
|-----|-------|
| Yes | 13    |
| No  | 15    |

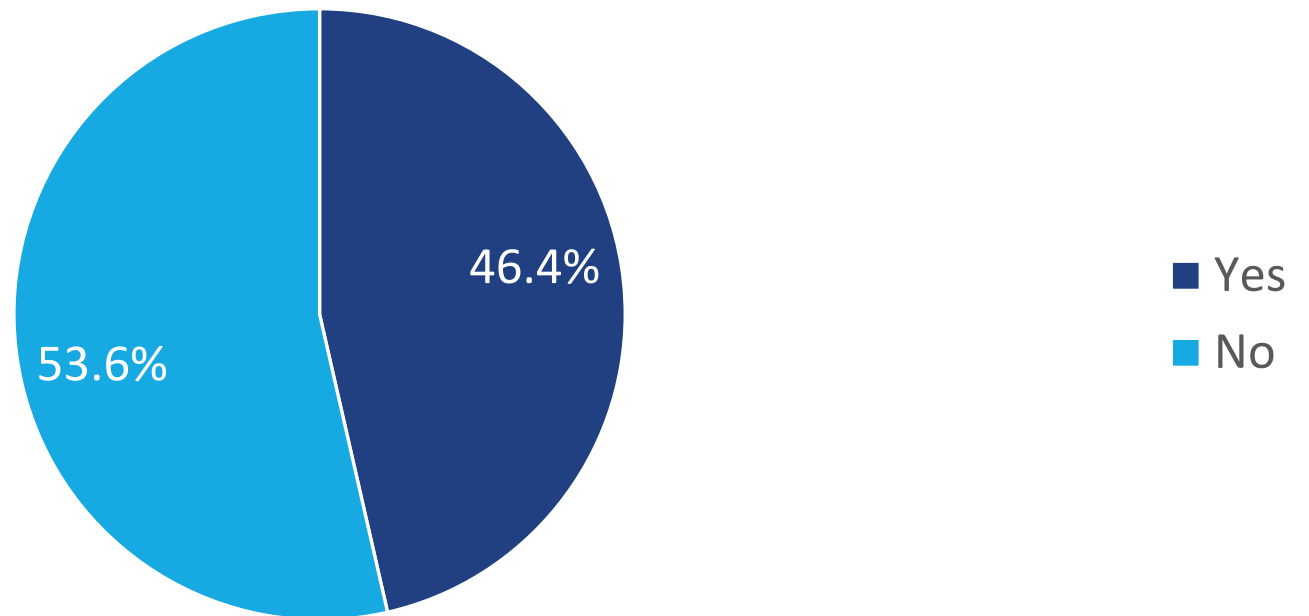

47. Can we extrapolate mCRPC clinical trial data regarding efficacy to the treatment of patients of other ethnicities than the majority of patients enrolled in these trials?

| Opt | Votes |
|-----|-------|
| Yes | 22    |
| No  | 6     |

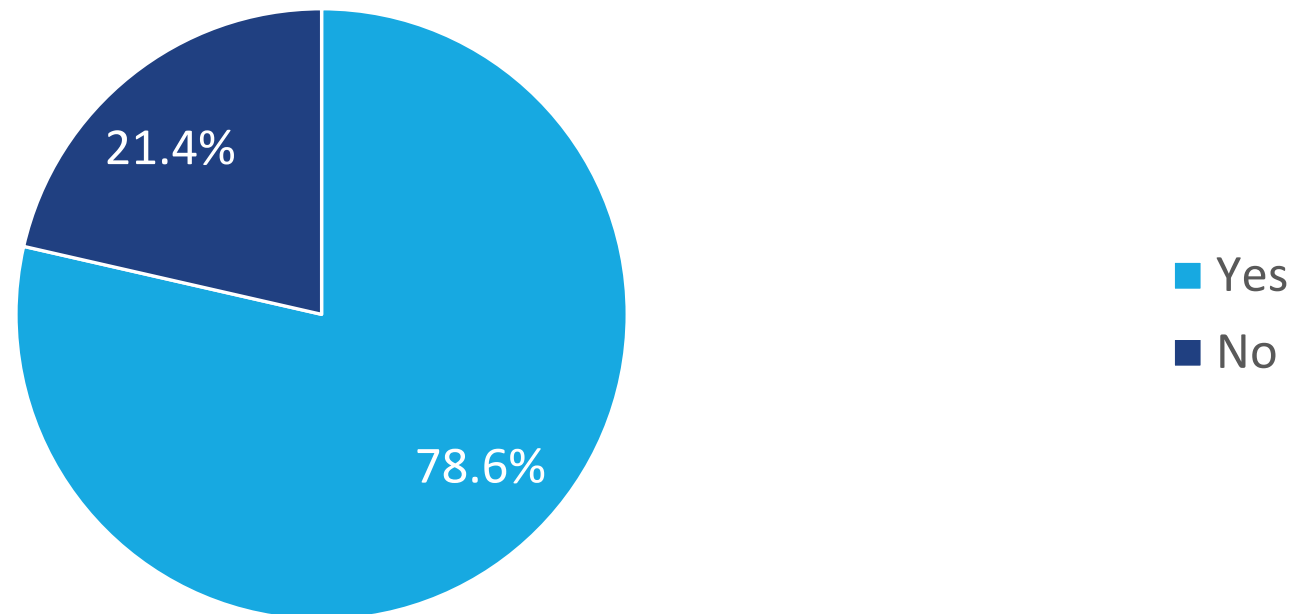

48. Can we extrapolate mCRPC clinical trial data regarding toxicity to the treatment of patients of other ethnicities than the majority of patients enrolled in these trials?

| Opt | Votes |
|-----|-------|
| Yes | 23    |
| No  | 5     |

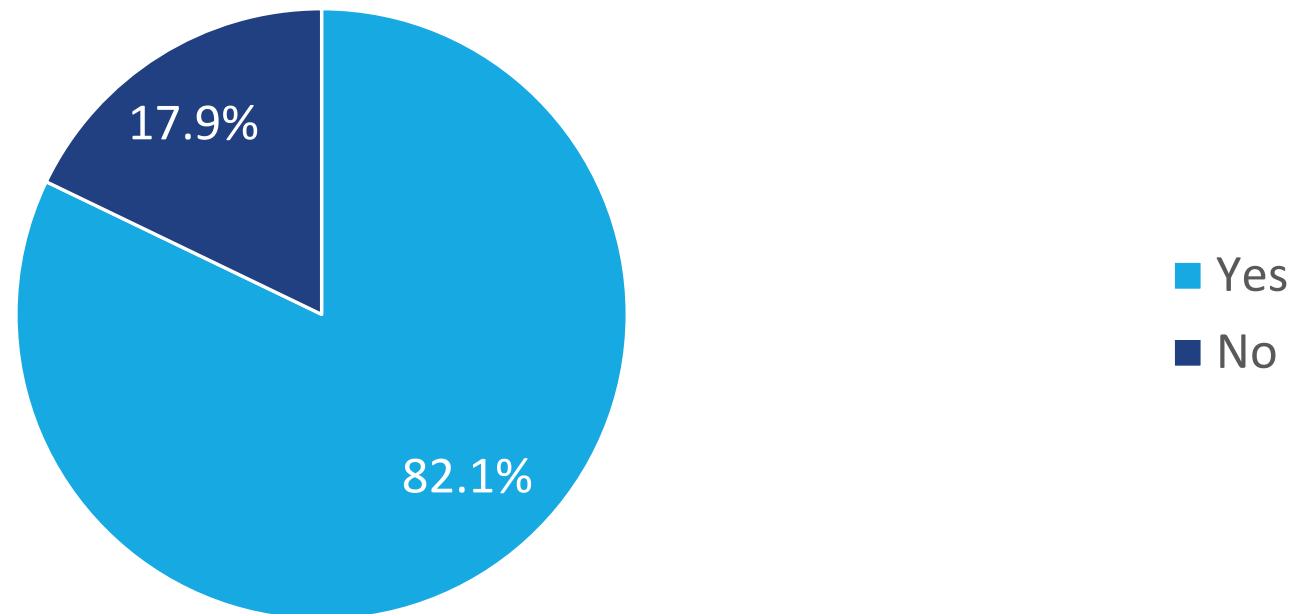

49. Do you recommend a geriatric assessment prior to treatment selection in patients with advanced prostate cancer who are  $\geq$ 70 years old?

| Opt                              | Votes |
|----------------------------------|-------|
| Yes, in the majority of patients | 1     |
| Yes, in a minority of patients   | 15    |
| No                               | 12    |

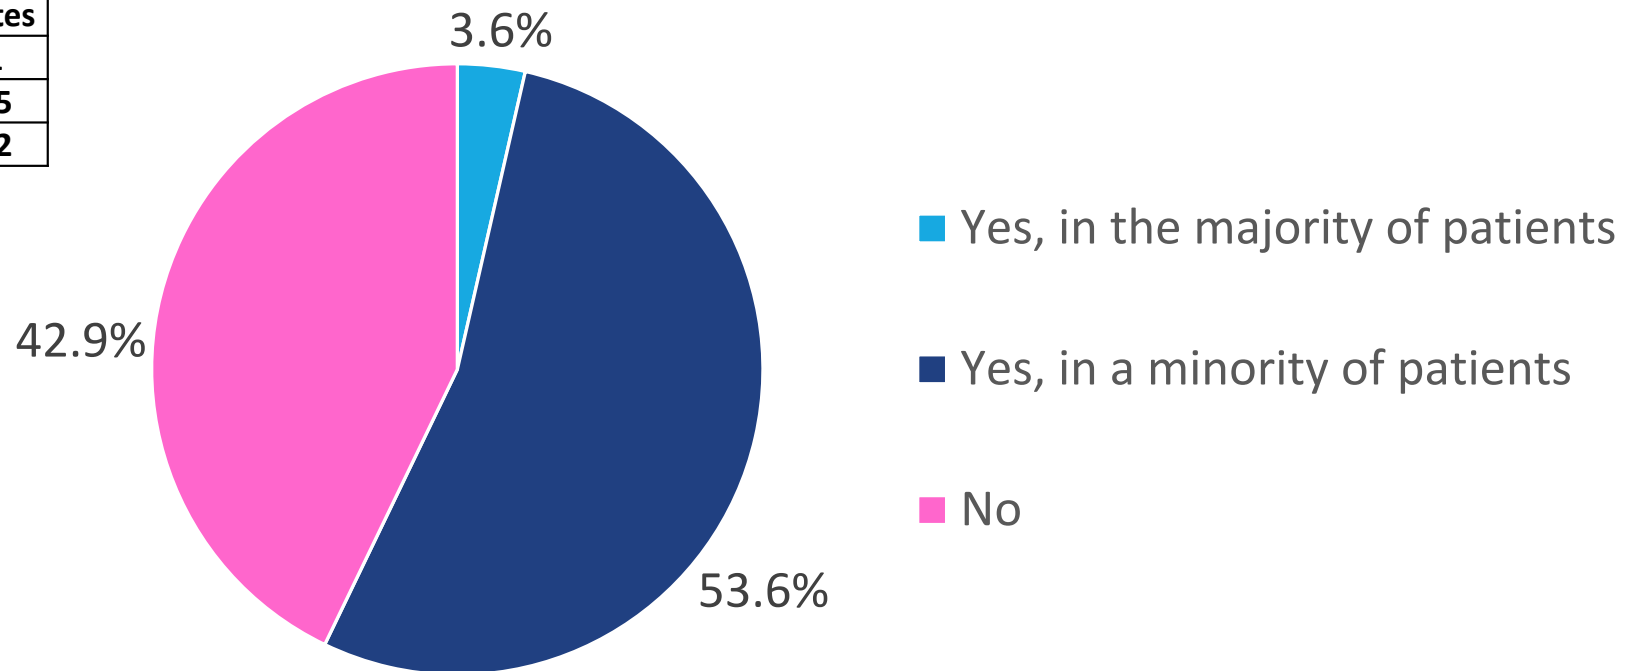

50. What is your preferred first management option to reduce fatigue in patients receiving systemic therapy for prostate cancer (apart from therapy dose reduction if possible)?

| Opt | Votes |
|-----|-------|
| ■   | 27    |
| ■   | 1     |

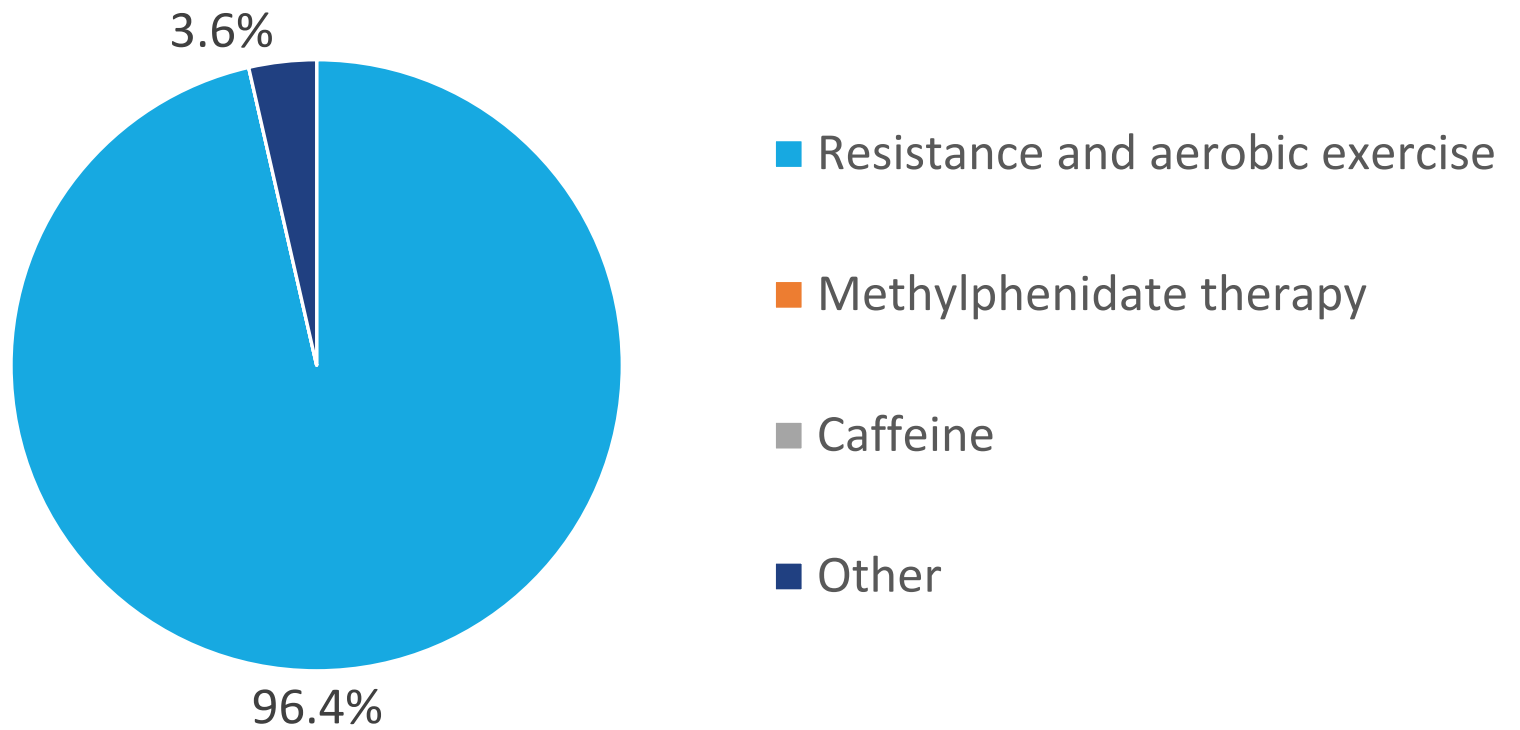

51. What is your preferred first management option for patients who develop clinically significant cognitive impairment on enzalutamide or apalutamide?

| Opt | Votes |
|-----|-------|
|     | 10    |
|     | 18    |

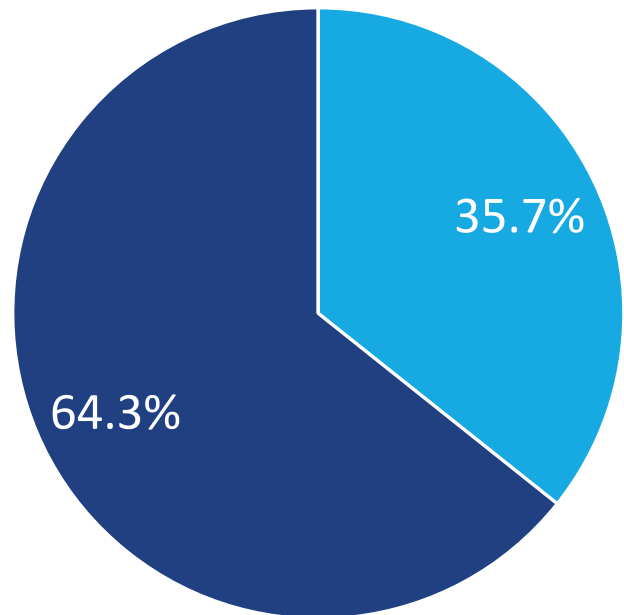

- Switch to abiraterone
- Reduce enzalutamide/apalutamide dose
- Add methylphenidate therapy
